# Supplementary material
Source: PubMed Central journal article supplement (PMC6493972)
Supplement: jm7b01824_si_001.pdf [file jm7b01824_si_001.pdf]

## SUPPORTING INFORMATION

### Synthesis and Biological Evaluation of (*E*)-4-Hydroxy-3-Methylbut-2-enyl Phosphate (HMBP) Aryloxy Triester Phosphoramidate Prodrugs as Activators of V $\gamma$ 9/V $\delta$ 2 T-Cells Immune Response

Martin S. Davey,<sup>a,‡</sup> Roshni Malde,<sup>b,‡</sup> Rory C. Mykura,<sup>b,‡</sup> Alfie T. Baker,<sup>a</sup> Taher E. Taher,<sup>a</sup> Cécile S. Le  
Duff,<sup>b</sup> Benjamin E. Willcox,<sup>\*a</sup> Youcef Mehellou<sup>\*,c</sup>

<sup>a</sup>Cancer Immunology and Immunotherapy Centre, University of Birmingham, Edgbaston, Birmingham  
B15 2TT, UK.

<sup>b</sup>School of Chemistry, University of Birmingham, Edgbaston, Birmingham B15 2TT, UK.

<sup>c</sup>School of Pharmacy and Pharmaceutical Sciences. Redwood Building, Cardiff University, Cardiff,  
CF10 3NB, UK.

#### Table of contents:

|                                                  |                |
|--------------------------------------------------|----------------|
| I. T-cell isolation, culture and activation..... | Page S2.       |
| II. Supporting Figures S1 and S2.....            | Pages S3.      |
| III. NMR spectra.....                            | Pages S4-S36.  |
| ○ Compound <b>2</b> (Page 4)                     |                |
| ○ Compound <b>3</b> (Page 5)                     |                |
| ○ Compound <b>4</b> (Page 6)                     |                |
| ○ Compound <b>9a</b> (Pages 7-8)                 |                |
| ○ Compound <b>9b</b> (Pages 8-9)                 |                |
| ○ Compound <b>9c</b> (Pages 10-11)               |                |
| ○ Compound <b>9d</b> (Pages 11-12)               |                |
| ○ Compound <b>5a</b> (Pages 13-15)               |                |
| ○ Compound <b>5b</b> (Pages 16-18)               |                |
| ○ Compound <b>5c</b> (Pages 19-21)               |                |
| ○ Compound <b>5d</b> (Pages 22-24)               |                |
| ○ Compound <b>6a</b> (Pages 25-27)               |                |
| ○ Compound <b>6b</b> (Pages 28-30)               |                |
| ○ Compound <b>6c</b> (Pages 31-33)               |                |
| ○ Compound <b>6d</b> (Pages 34-36)               |                |
| IV. HPLC spectra of compounds <b>5a-d</b> .....  | Pages S37-S40. |
| ○ Compound <b>5a</b> (Page 37)                   |                |
| ○ Compound <b>5b</b> (Page 38)                   |                |
| ○ Compound <b>5c</b> (Page 39)                   |                |
| ○ Compound <b>5d</b> (Page 40)                   |                |
| V. Mass spec data.....                           | Pages 41-42.   |
| ○ Compound <b>5a</b> (Page 41)                   |                |
| ○ Compound <b>5b</b> (Page 41)                   |                |
| ○ Compound <b>5c</b> (Page 42)                   |                |
| ○ Compound <b>5d</b> (Page 42)                   |                |

## I. T-cell isolation, culture and activation

PBMCs were isolated from heparinised venous blood from consented healthy donors (approved by the NRES Committee West Midlands ethical board; REC reference 14/WM/1254). Blood was layered over lymphoprep<sup>®</sup> (Stem Cell Technologies) and PBMC isolated according to manufacturers instructions. The cell culture medium used throughout was RPMI-1640 media supplemented with 2 mM L-glutamine, 25 mM HEPES, 1% sodium pyruvate, 50 µg/ml penicillin/streptomycin (Invitrogen) and 10% fetal calf serum (Sigma). For activation assays,  $5 \times 10^5$  PBMC were cultured for 20 h in the presence of medium alone or the indicated concentrations of HMB-PP (Sigma), Zoledronate (Sigma), **5a**, **5b**, **5c** and **5d** (as described above). Cultured PBMC were labelled with Zombie<sup>®</sup> aqua viability dye (Biolegend) and cells were stained for surface antigens by antibodies directed against CD3 (UCHT1; 1:100), CD8 (SK1; 1:200), CD25 (2A3; 1:200); all Biolegend, CD69 (TP1.55.3; 1:20) and TCR V $\gamma$ 9 (IMMU360; 1:400); Beckman Coulter, and TCR V $\delta$ 2 (123R3; 1:200); Miltenyi. For killing assays, V $\gamma$ 9/V $\delta$ 2 T cells were expanded from  $2 \times 10^5$ /ml PBMC cultured with 10 µM zoledronate for 14 days and supplemented with 100 U/ml IL-2 into the media every 2-3 days, yielding 83 – 91% V $\gamma$ 9/V $\delta$ 2 T cells. T24 (ATCC HTB4) cell line were labelled with 0.1µM CFSE and incubated for 4 hours with 10 µM zoledronate or 10 nM ProPAgens (**5a - d**), before being washed five-times in medium and co-cultured with expanded V $\gamma$ 9/V $\delta$ 2 T cells for 18 hours. All cells were then labelled with Zombie<sup>®</sup> aqua viability dye and CFSE<sup>+</sup> Zombie<sup>®</sup> aqua<sup>+</sup> cells measured. All data were acquired on an LSR II (Beckton Dickinson) and data analysed with FlowJo V10.1 (TreeStar). Tabulated data were analysed in Graphpad PRISM 7 (Graphpad Software Inc).

**Supporting Figure S1.**

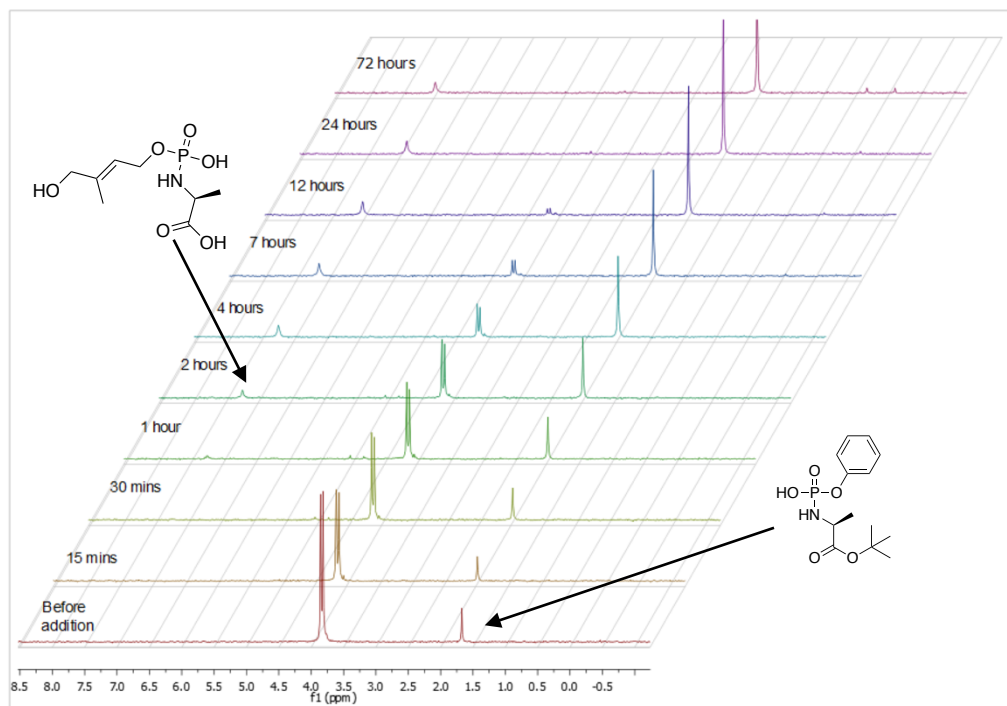

**Figure S1:**  $^{31}\text{P}$  NMR of HMBP ProPAGEN 6d incubated with the carboxypeptidase cathepsin A. The two singlets at 4.02 ppm corresponds to the two diastereoisomers of ProPAGEN 6d. The singlet at 6.87 ppm corresponds to the amino acyl monoester as shown. The singlet at 1.98 ppm corresponds to the degradation product shown in the figure and confirmed by mass spec (see below). The presence of the undesired metabolite that has a  $^{31}\text{P}$  NMR is a reflection of the low stability of these compounds. The experiment was carried out as reported previously by Osgerby et al. 2017, 60 (8), 3518–3524.

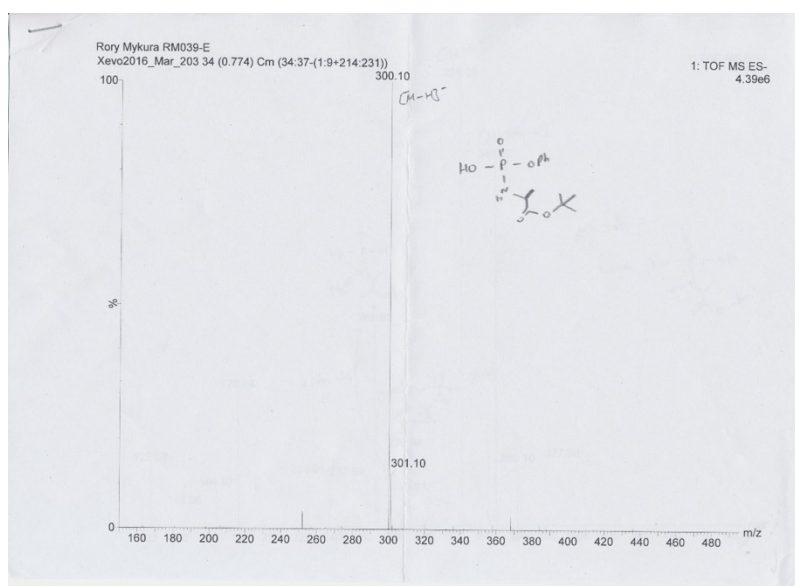

**Figure S2.** Negative ion spectrum for HMBP ProPAGEN 6d following incubation with cathepsin A for 72 hours.

## II. NMR spectra

### 1-((tert-butyldimethylsilyl)oxy)propan-2-one, 2:

#### $^1\text{H}$ NMR

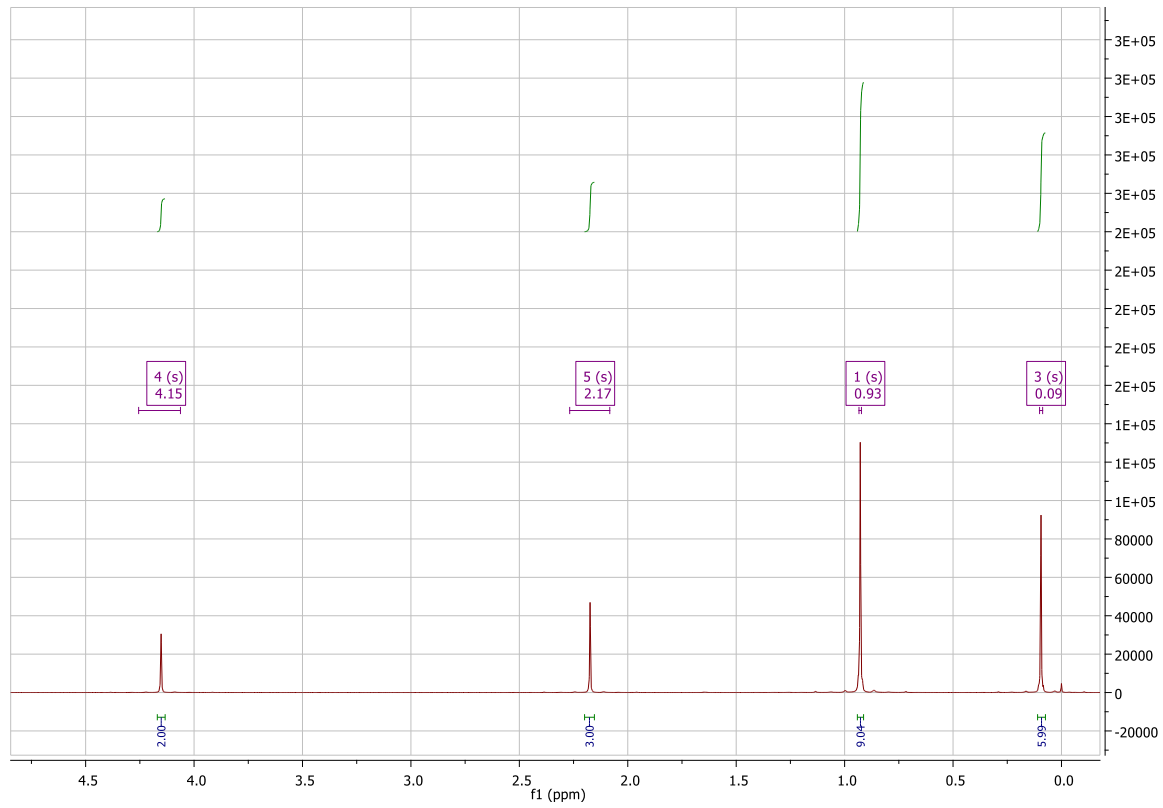

#### $^{13}\text{C}$ NMR

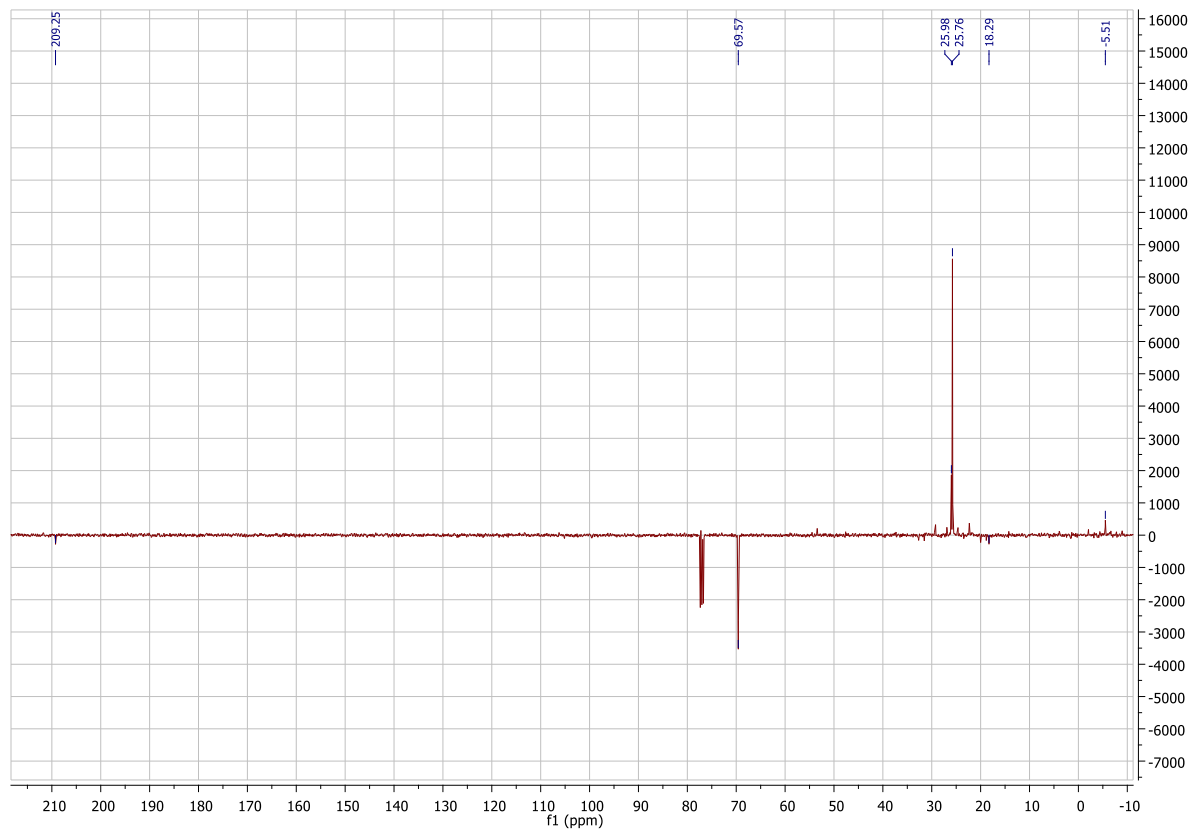

# Ethyl (E)-4-((tert-butyl dimethylsilyl)oxy)-3-methylbut-2-enoate, 3:

## <sup>1</sup>H NMR

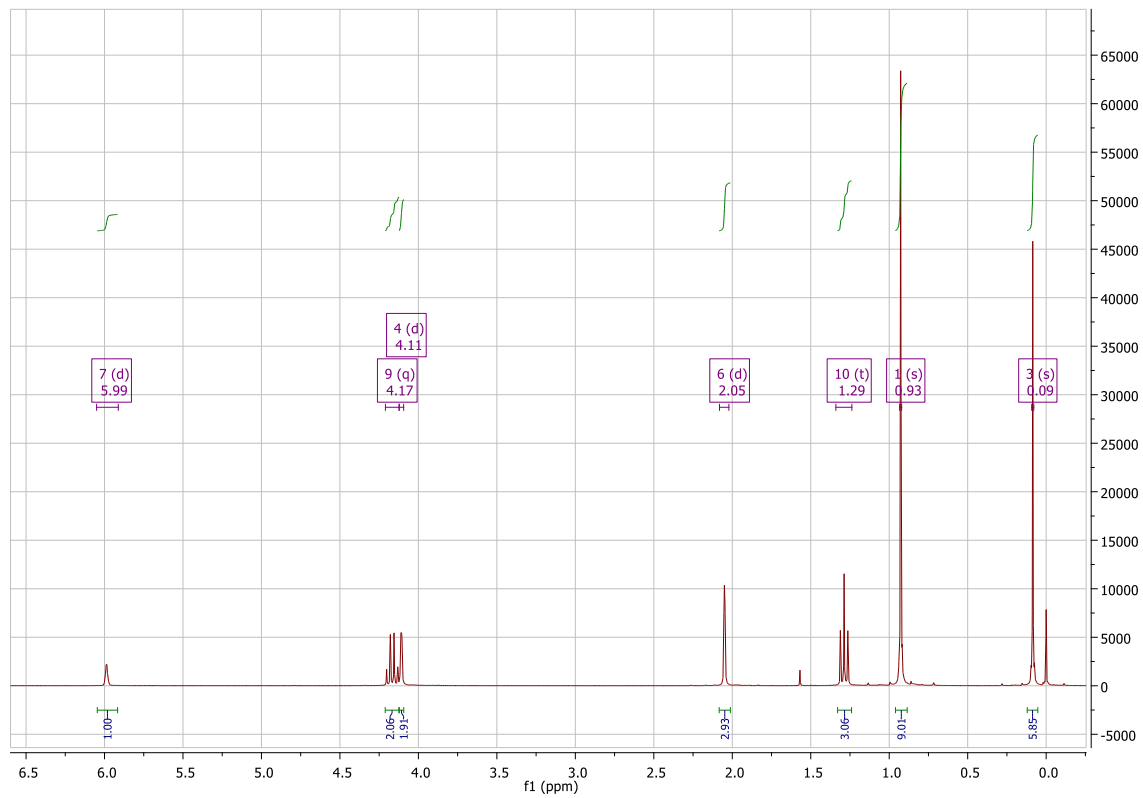

## <sup>13</sup>C NMR

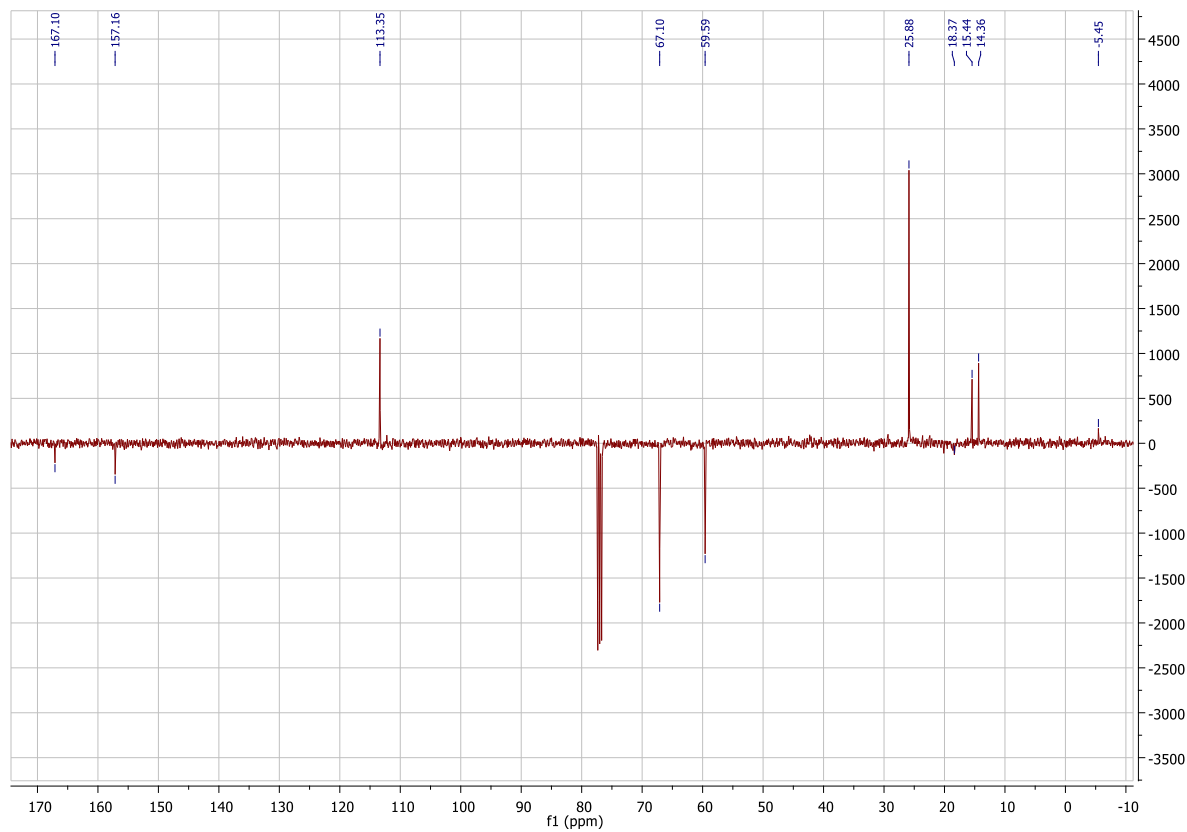

**(E)-4-((tert-butyldimethylsilyl)oxy)-3-methylbut-2-en-1-ol, 4:**

**<sup>1</sup>H NMR**

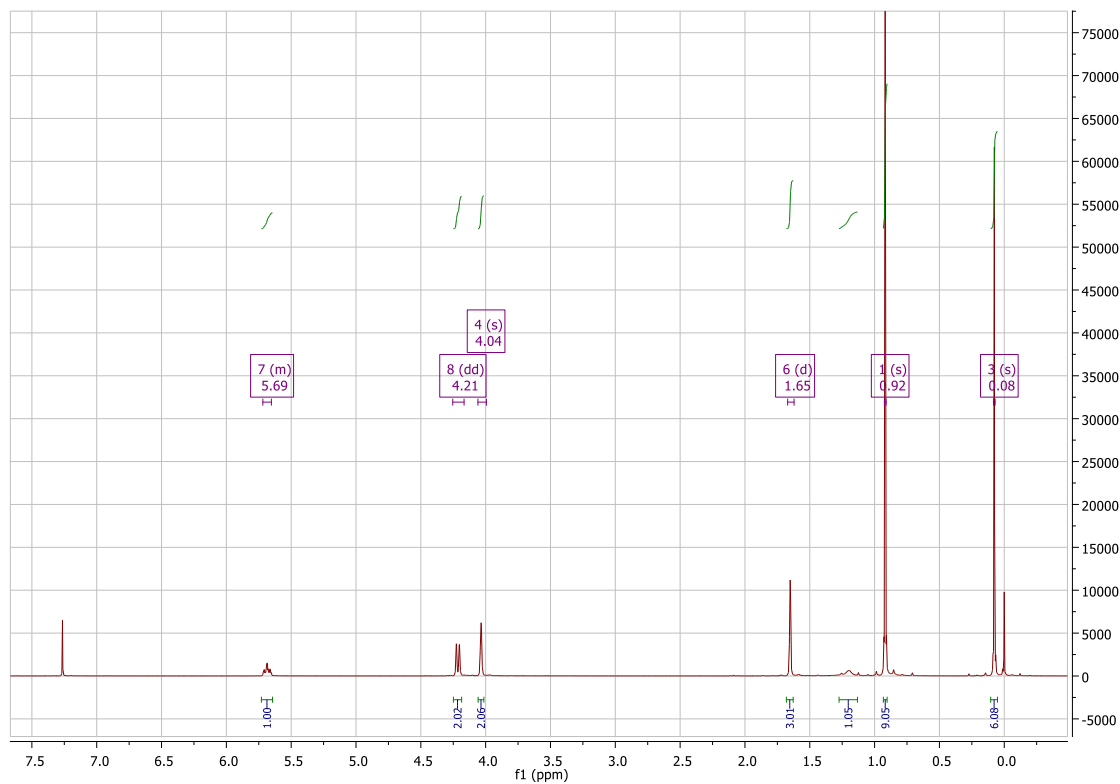

**<sup>13</sup>C NMR**

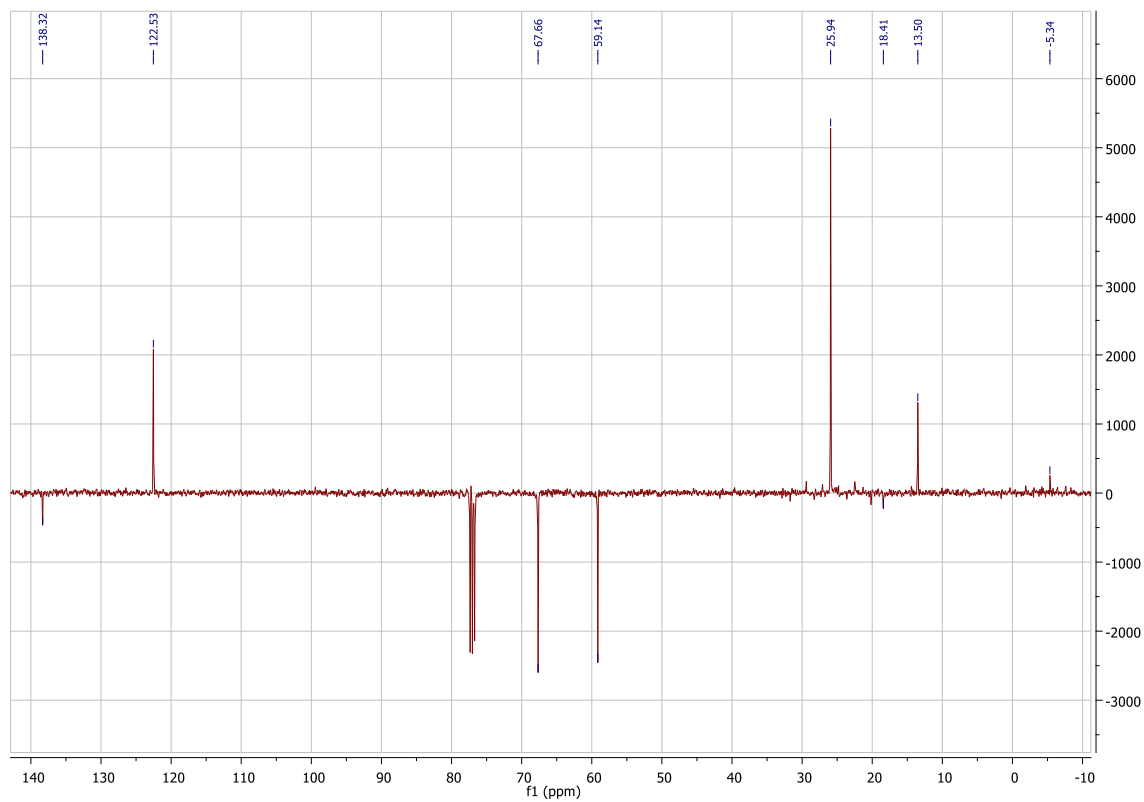

# Methyl (chloro(phenoxy)phosphoryl)-L-alaninate, 9a:

## $^1\text{H}$ NMR

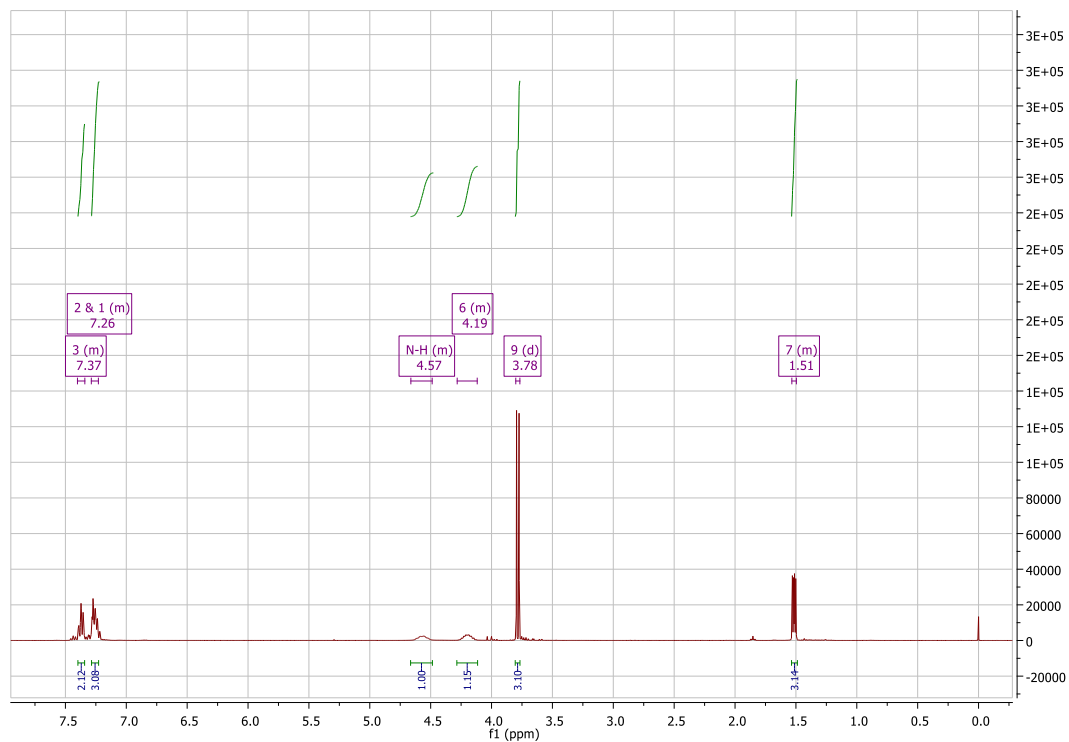

## $^{13}\text{C}$ NMR

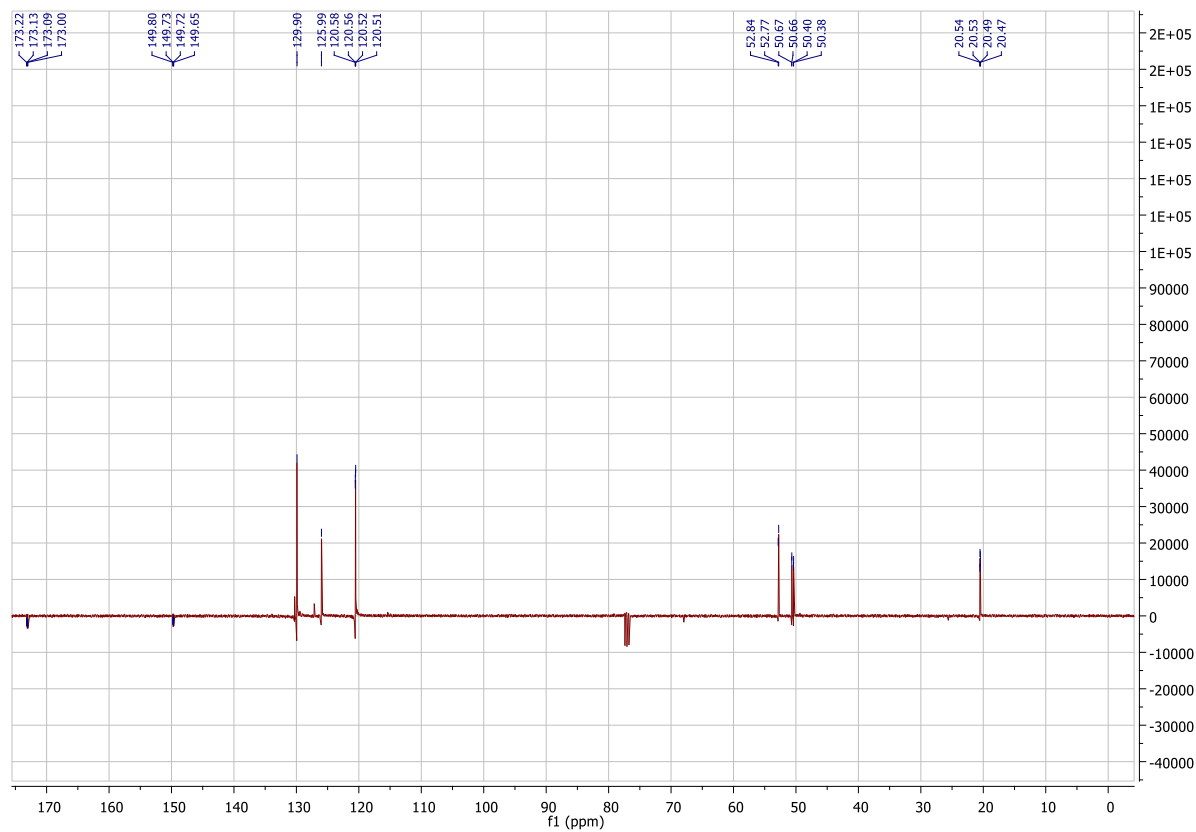

### $^{31}\text{P}$ NMR

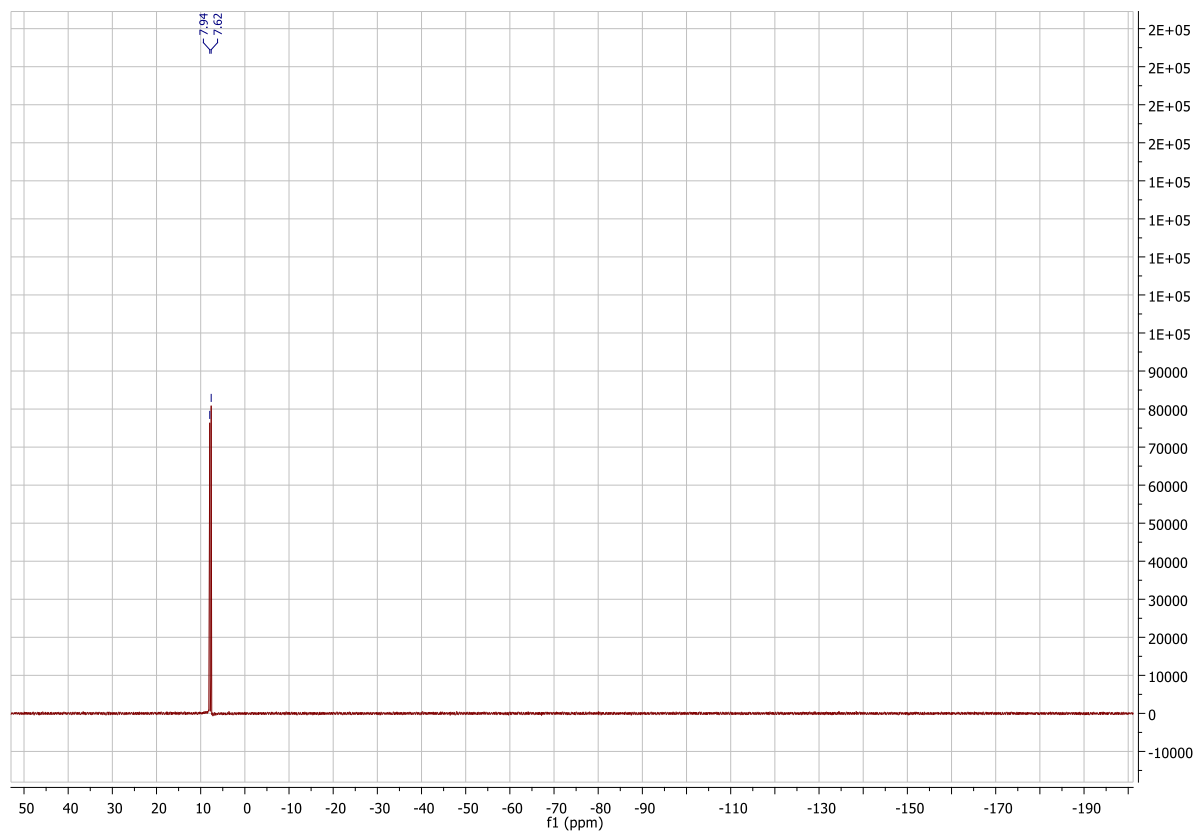

### Benzyl (chloro(phenoxy)phosphoryl)-L-alaninate, 9b:

#### $^1\text{H}$ NMR

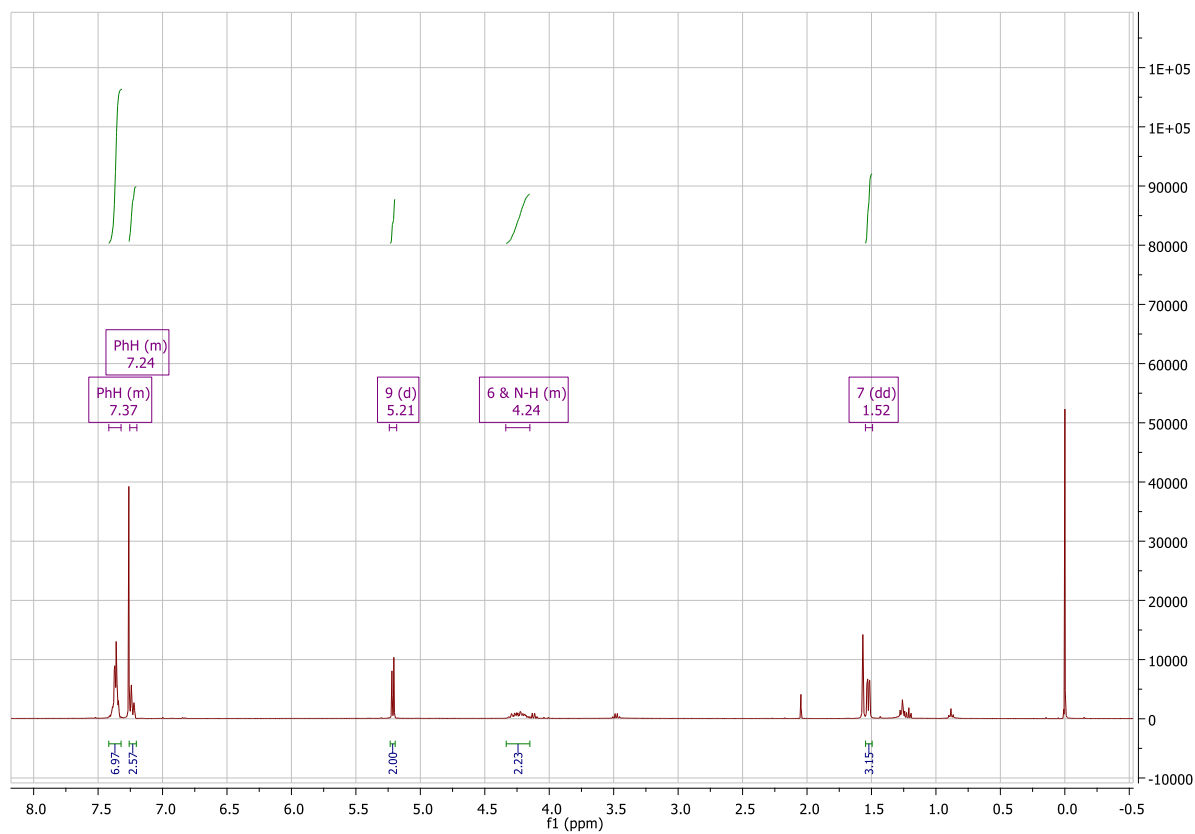



# <sup>13</sup>C NMR

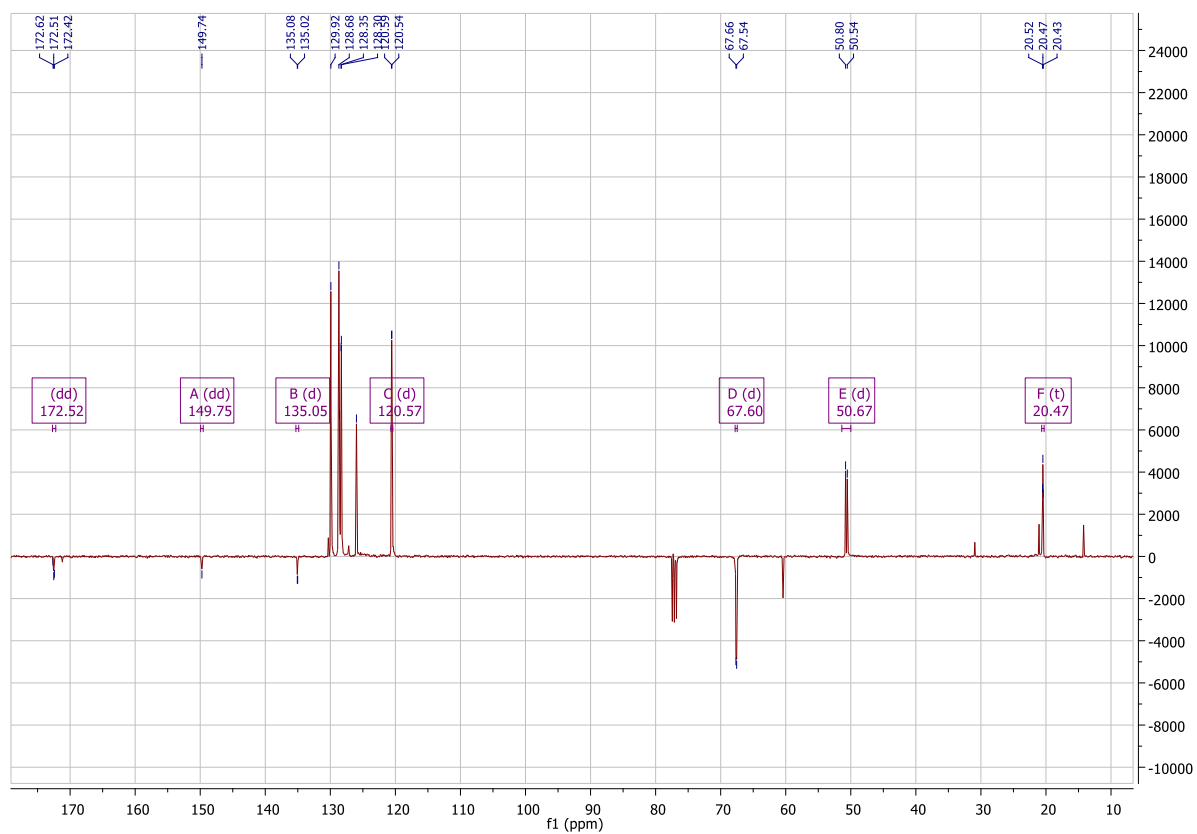

# <sup>31</sup>P NMR

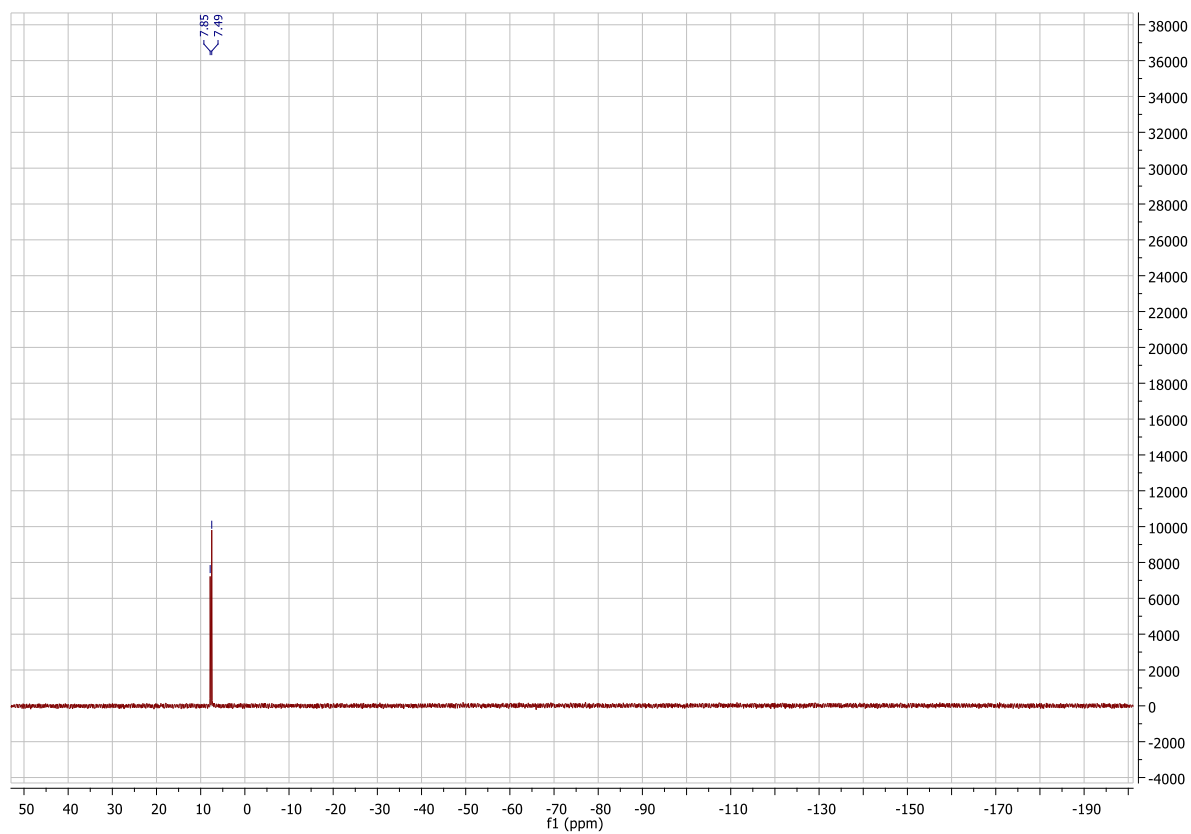

# Isopropyl (chloro(phenoxy)phosphoryl)-L-alaninate, 9c:

## <sup>1</sup>H NMR

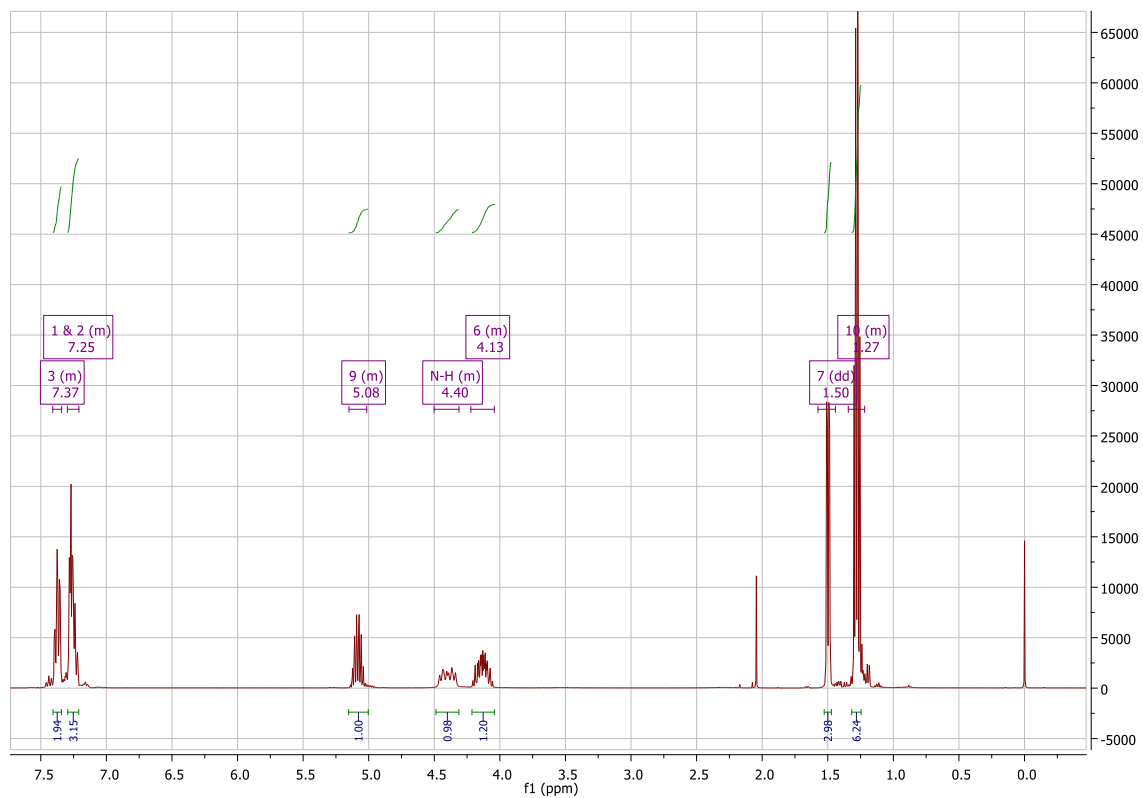

## <sup>13</sup>C NMR

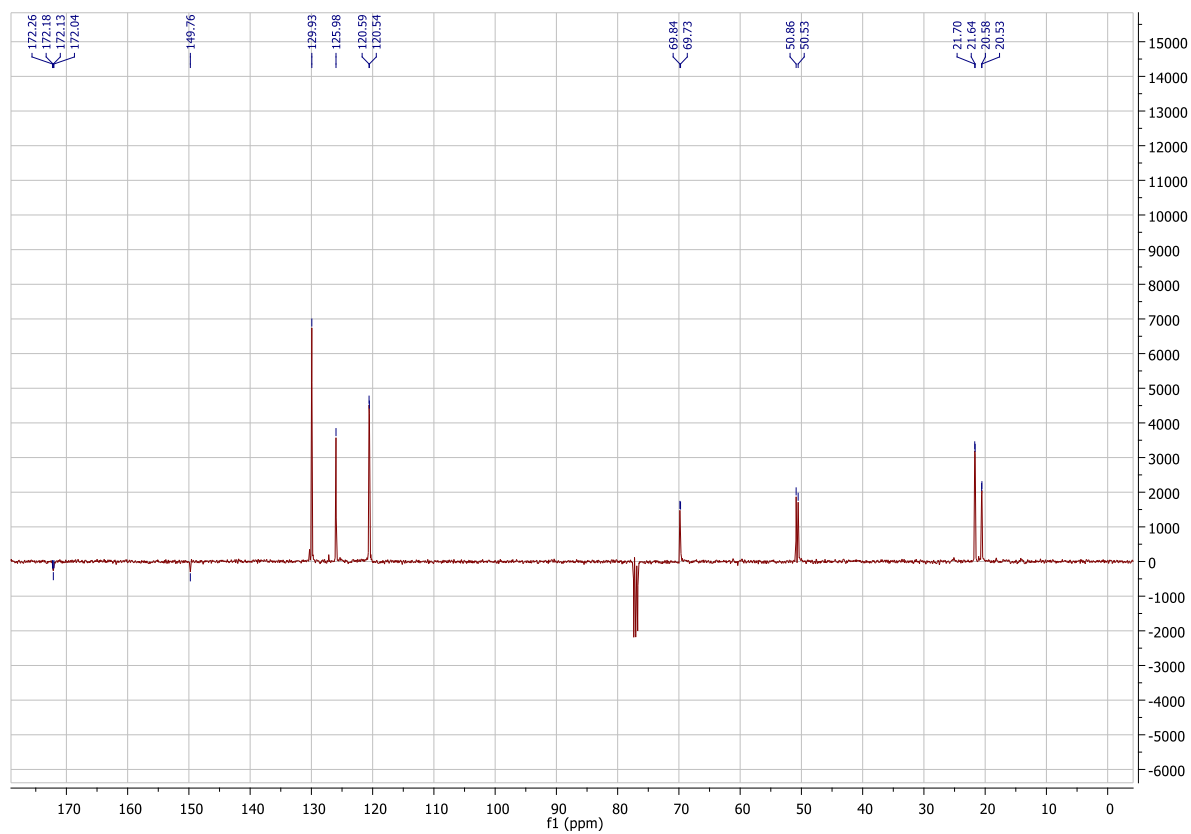

# $^{31}\text{P}$ NMR

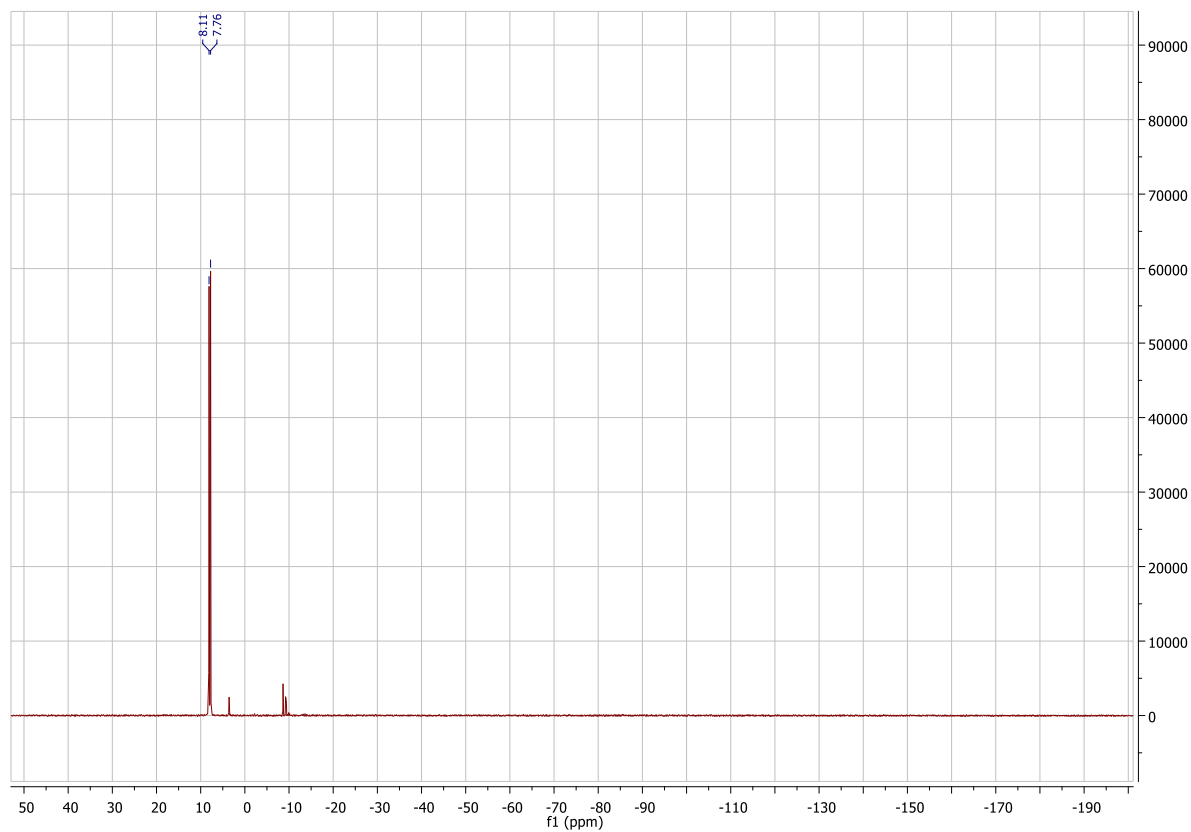

## Tert-butyl (chloro(phenoxy)phosphoryl)-L-alaninate, 9d:

### $^1\text{H}$ NMR

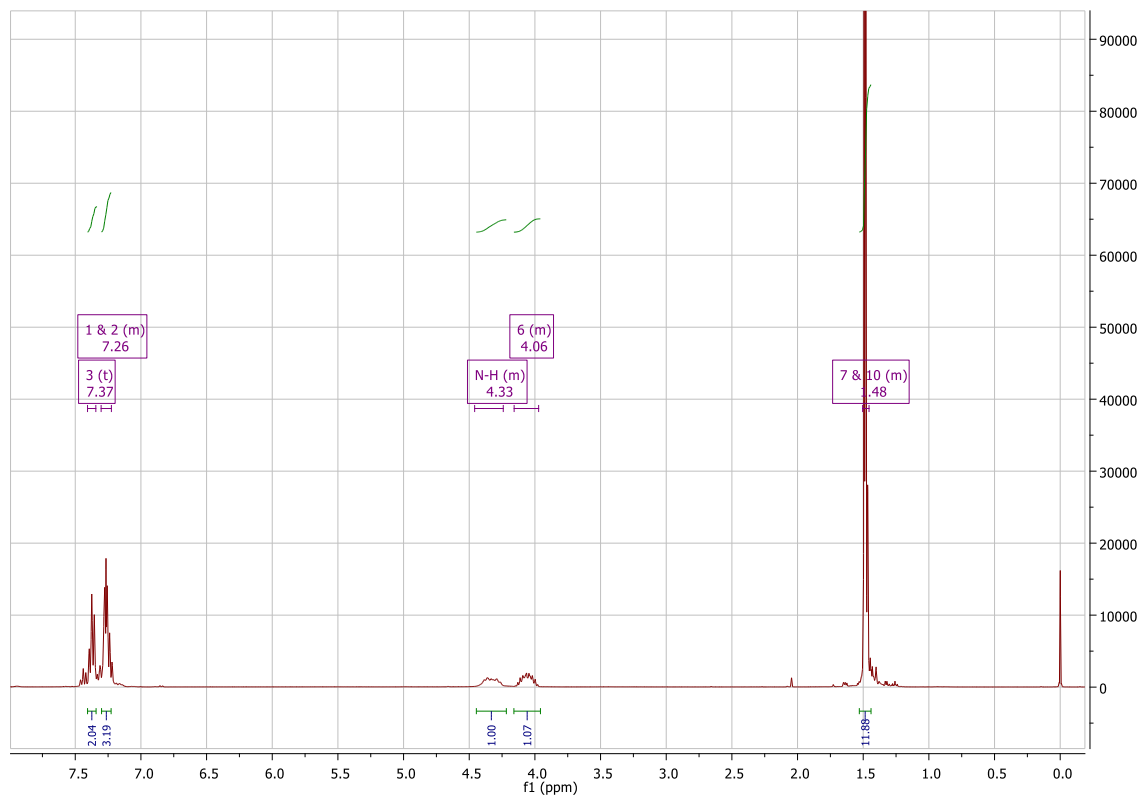

# $^{13}\text{C}$ NMR

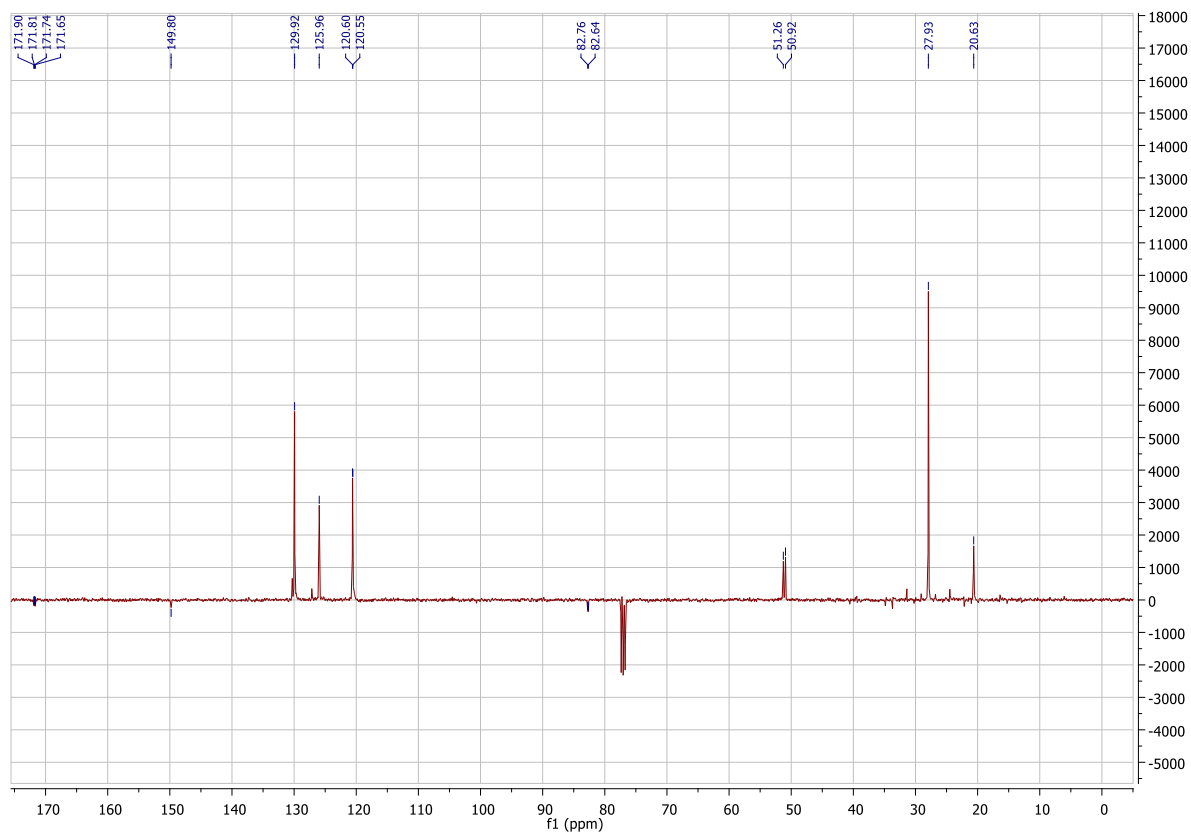

# $^{31}\text{P}$ NMR

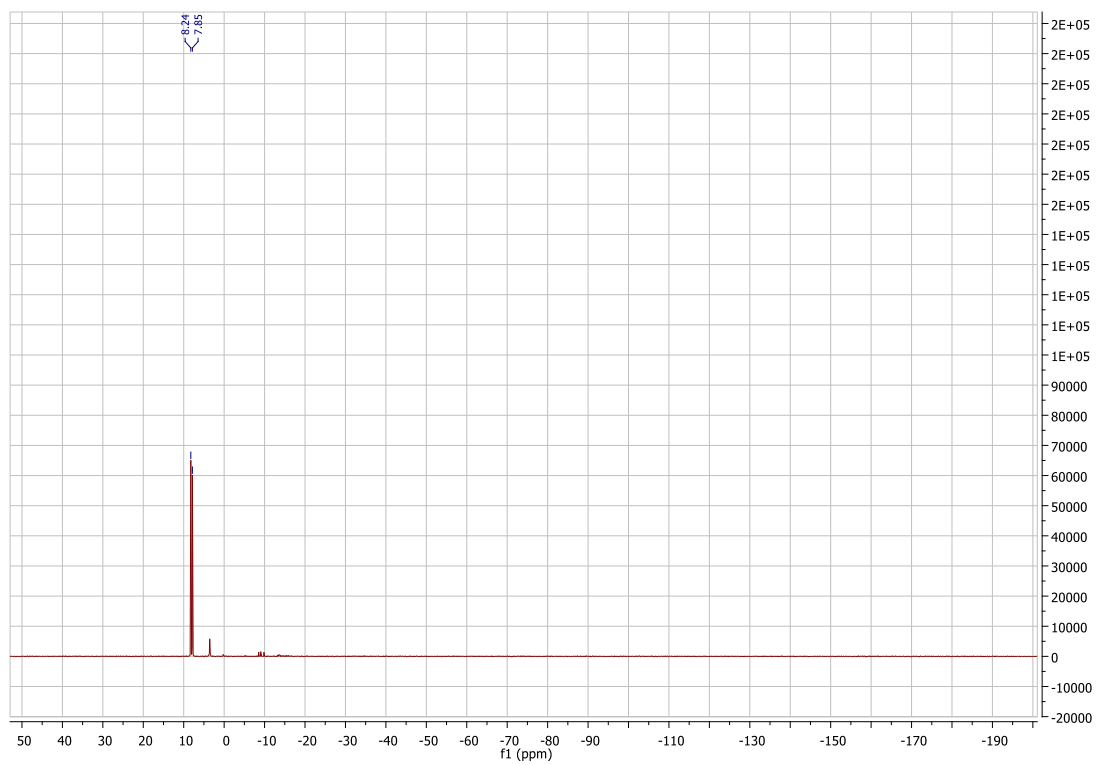

# Methyl (((E)-4-((tert-butyldimethylsilyl)oxy)-3-methylbut-2-en-1-yl)oxy)(phenoxy)phosphoryl)-L-alaninate, 5a:

## <sup>1</sup>H NMR

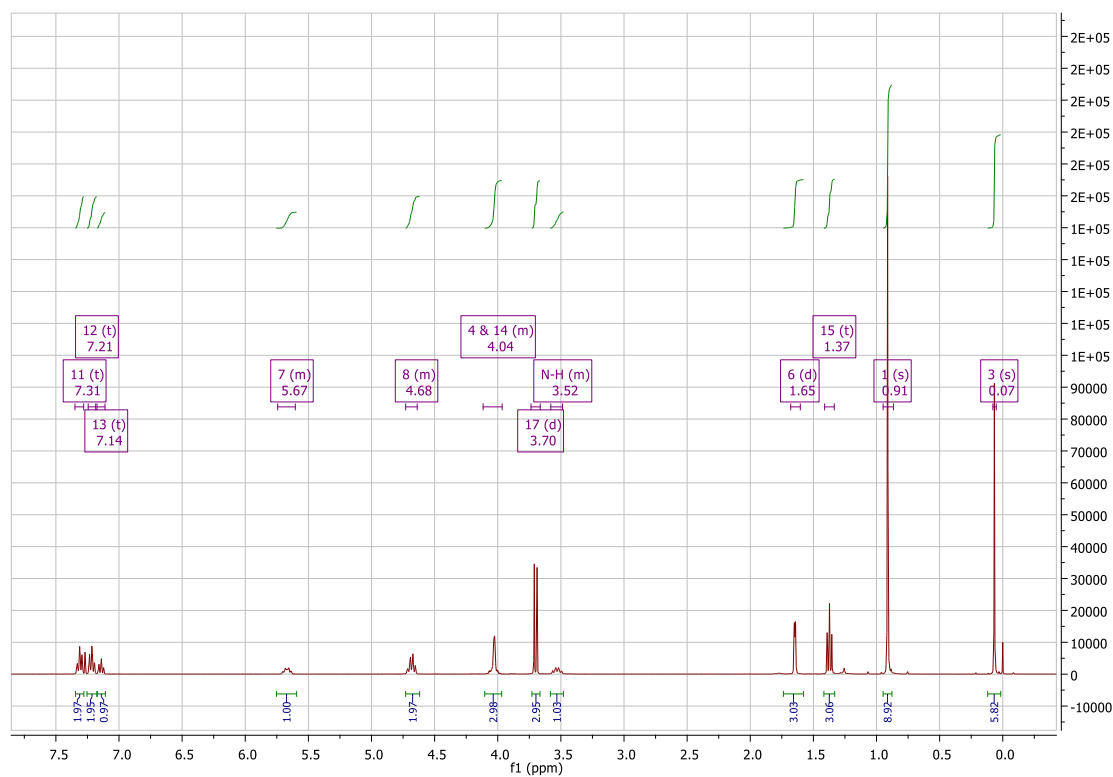

## <sup>13</sup>C NMR

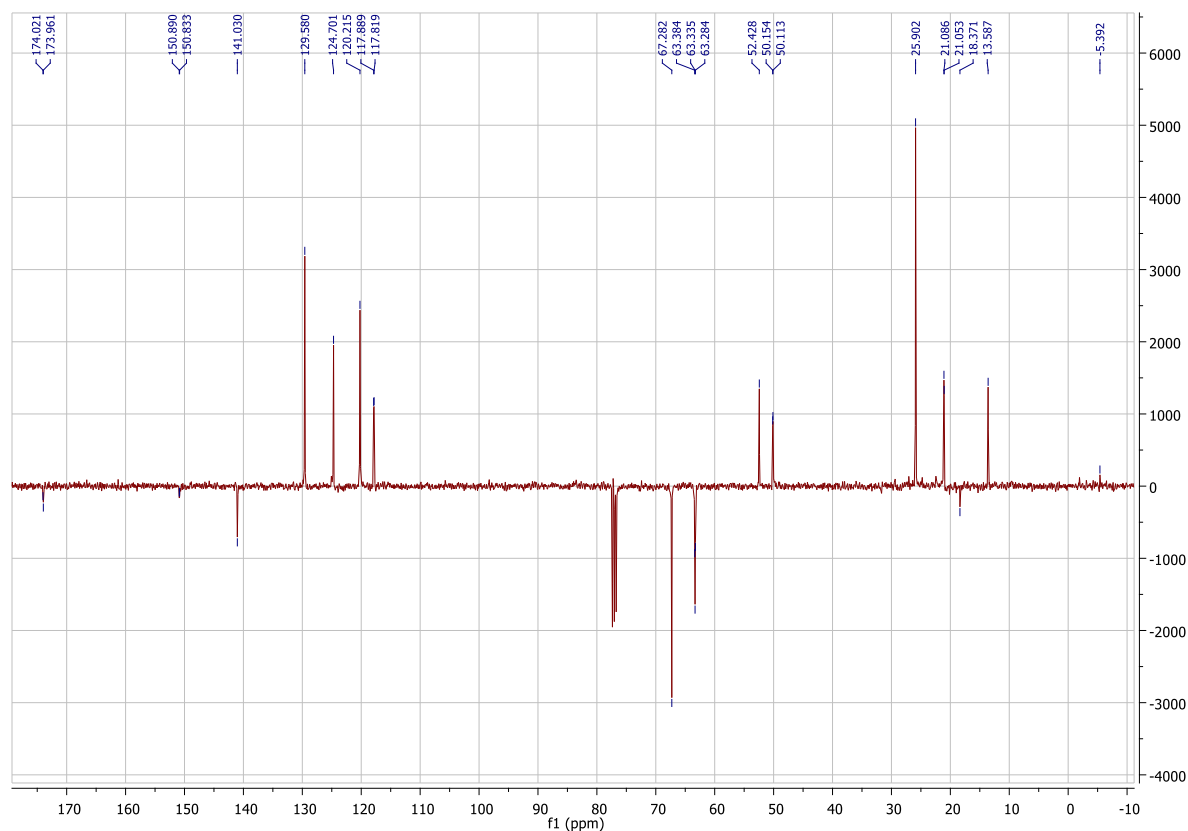

# $^1\text{H}$ COSY

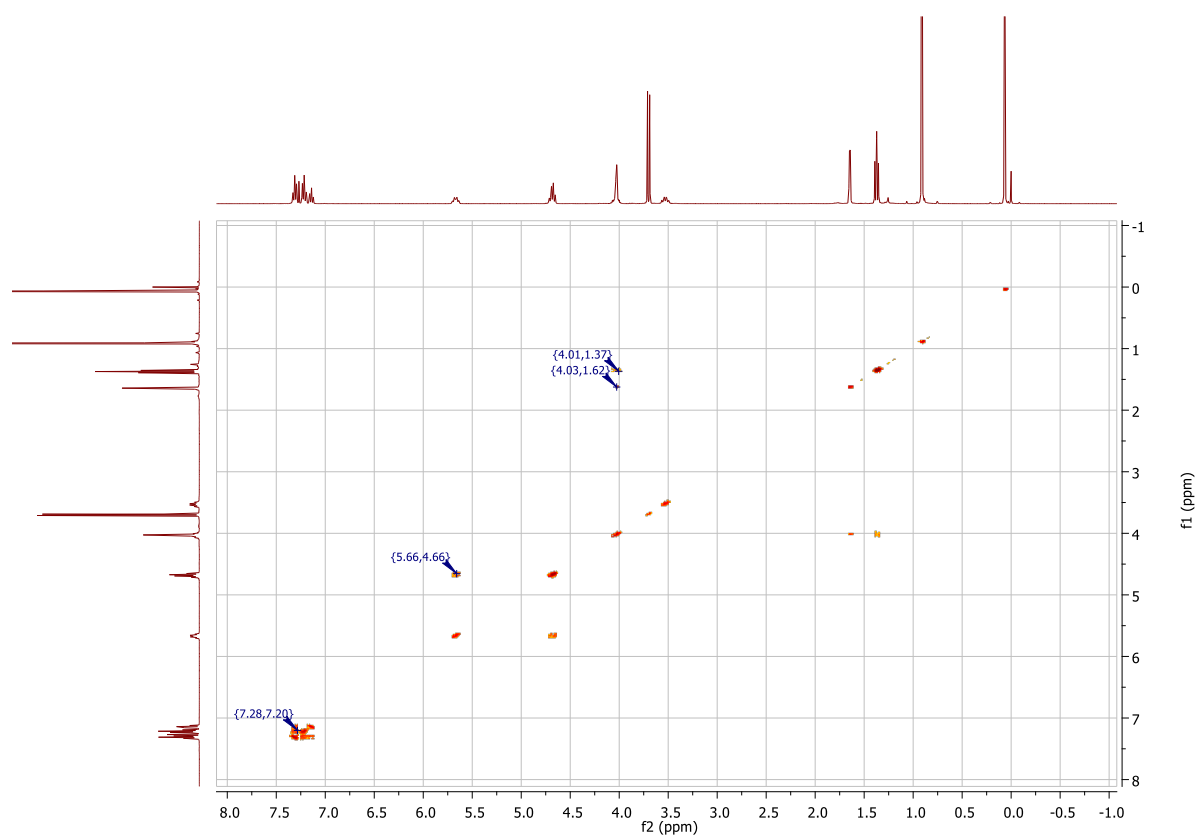

# $^{13}\text{C}$ DEPT-45

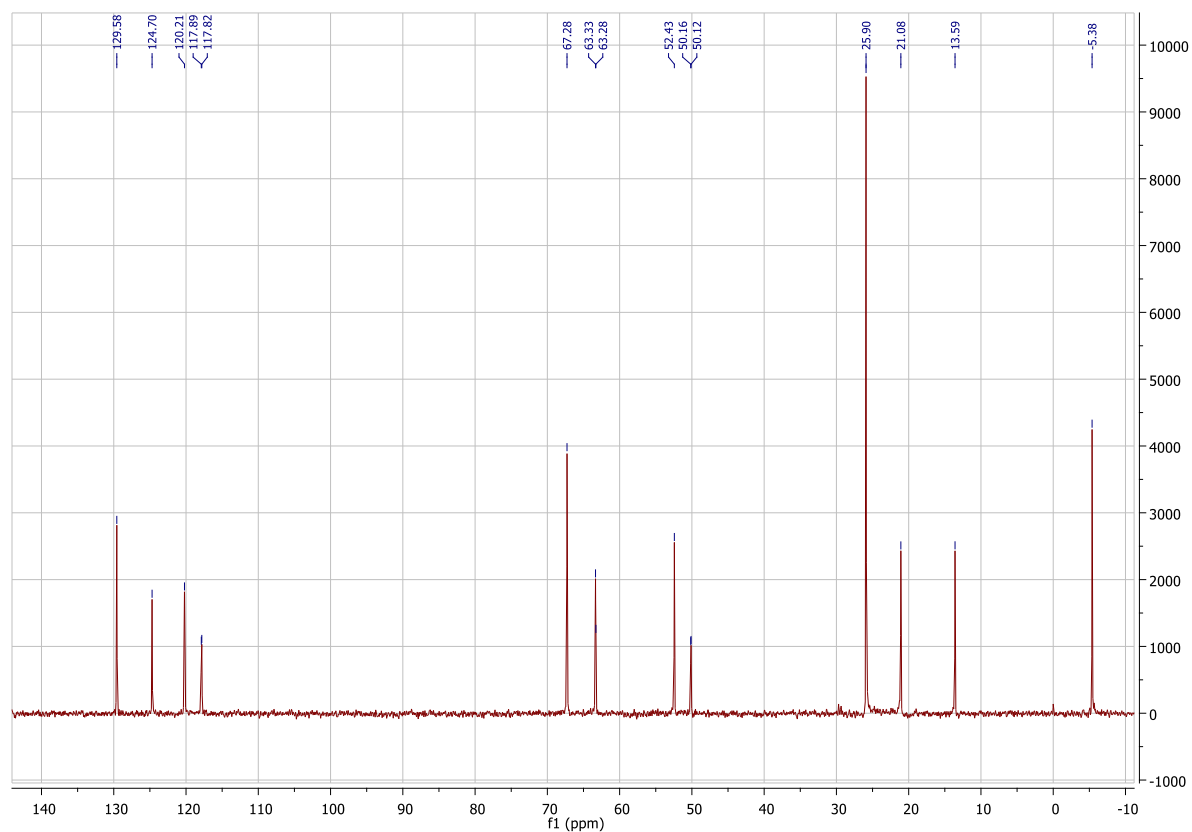

## HSQC

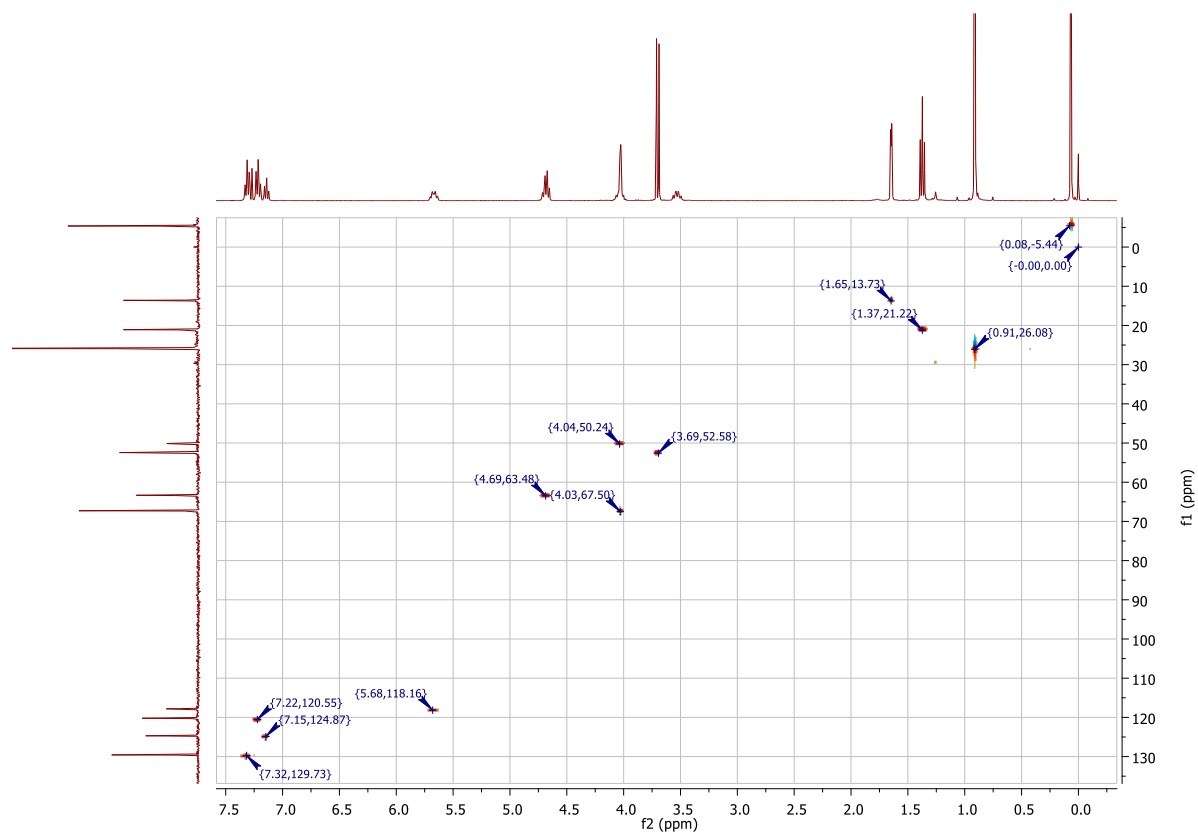

## $^{31}\text{P}$ NMR

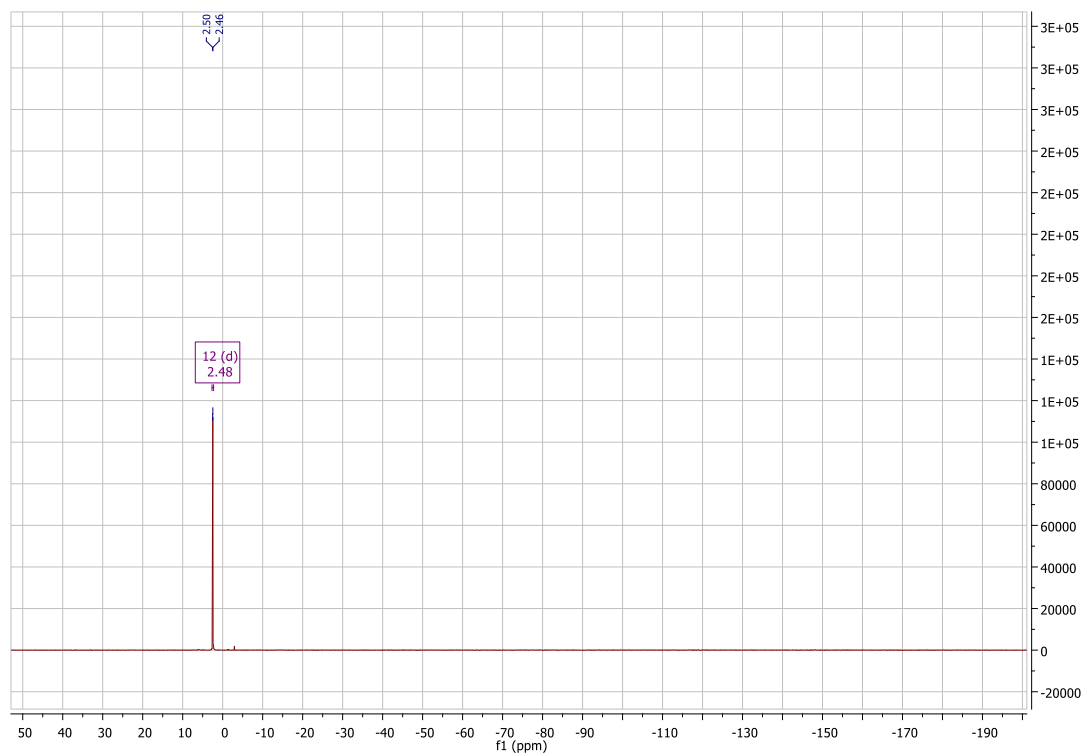

**Benzyl (((E)-4-((tert-butyldimethylsilyloxy)-3-methylbut-2-en-1-yl)oxy)(phenoxy)phosphoryl)-L-alaninate, 5b:**

# <sup>1</sup>H NMR

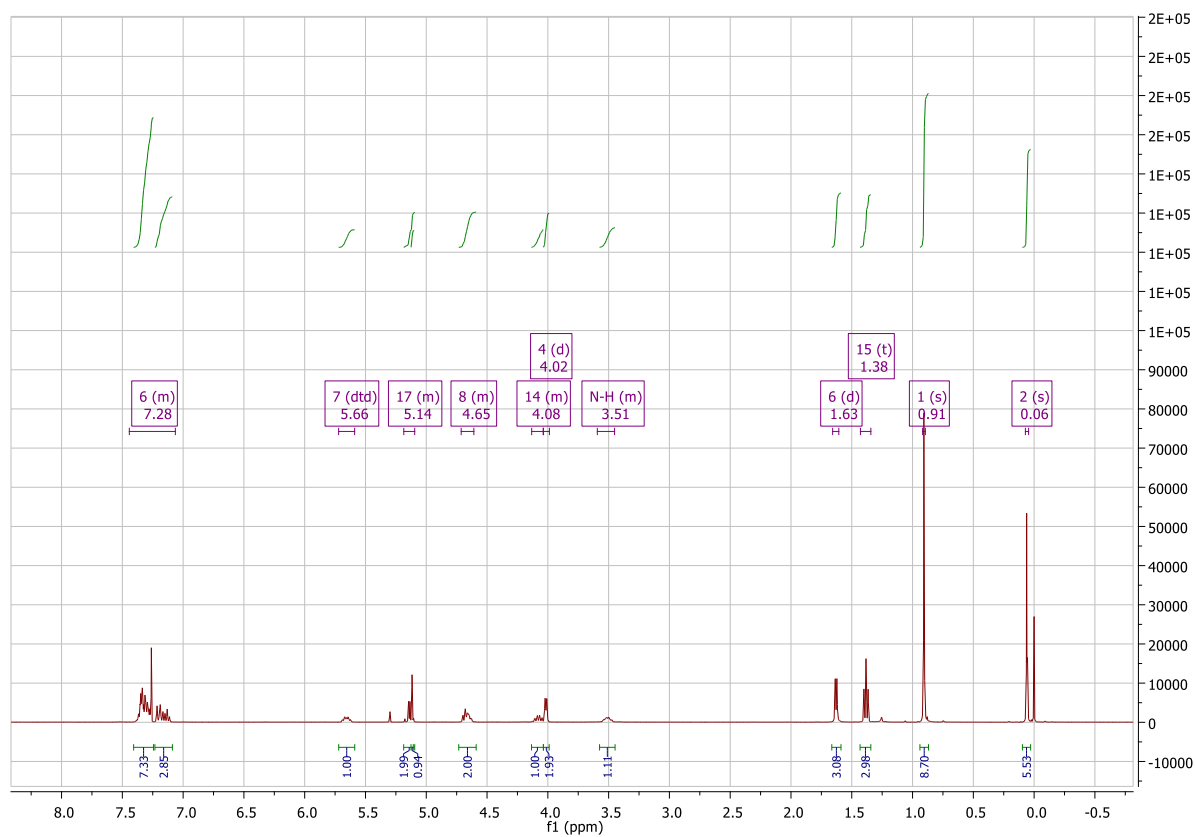

# <sup>13</sup>C NMR

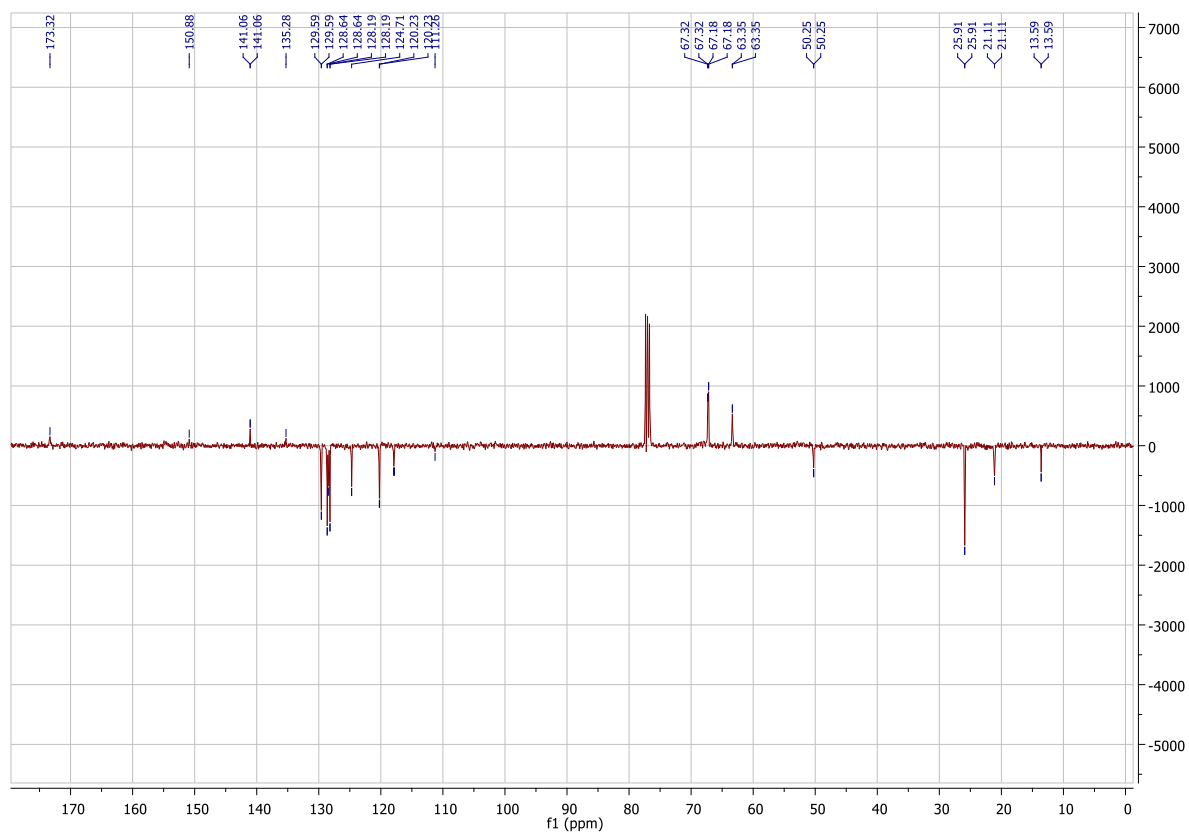



# $^1\text{H}$ COSY

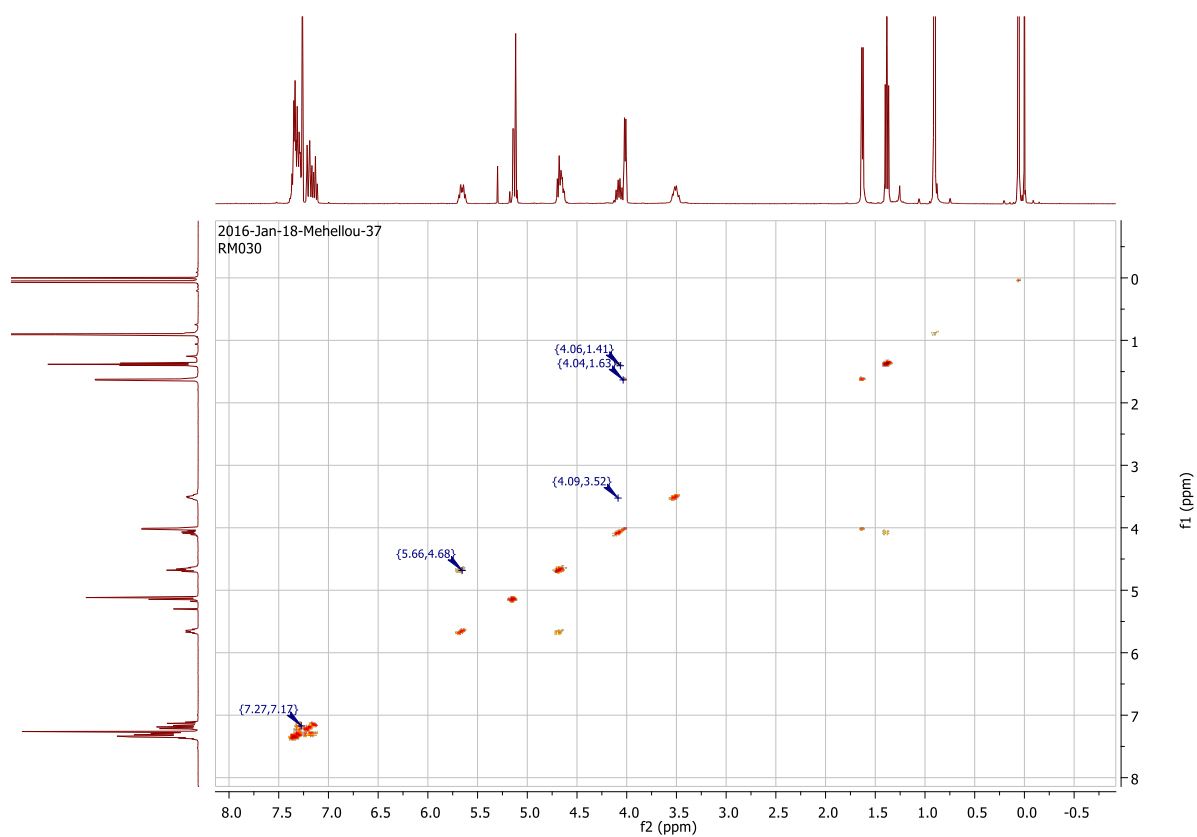

# $^{13}\text{C}$ DEPT-45

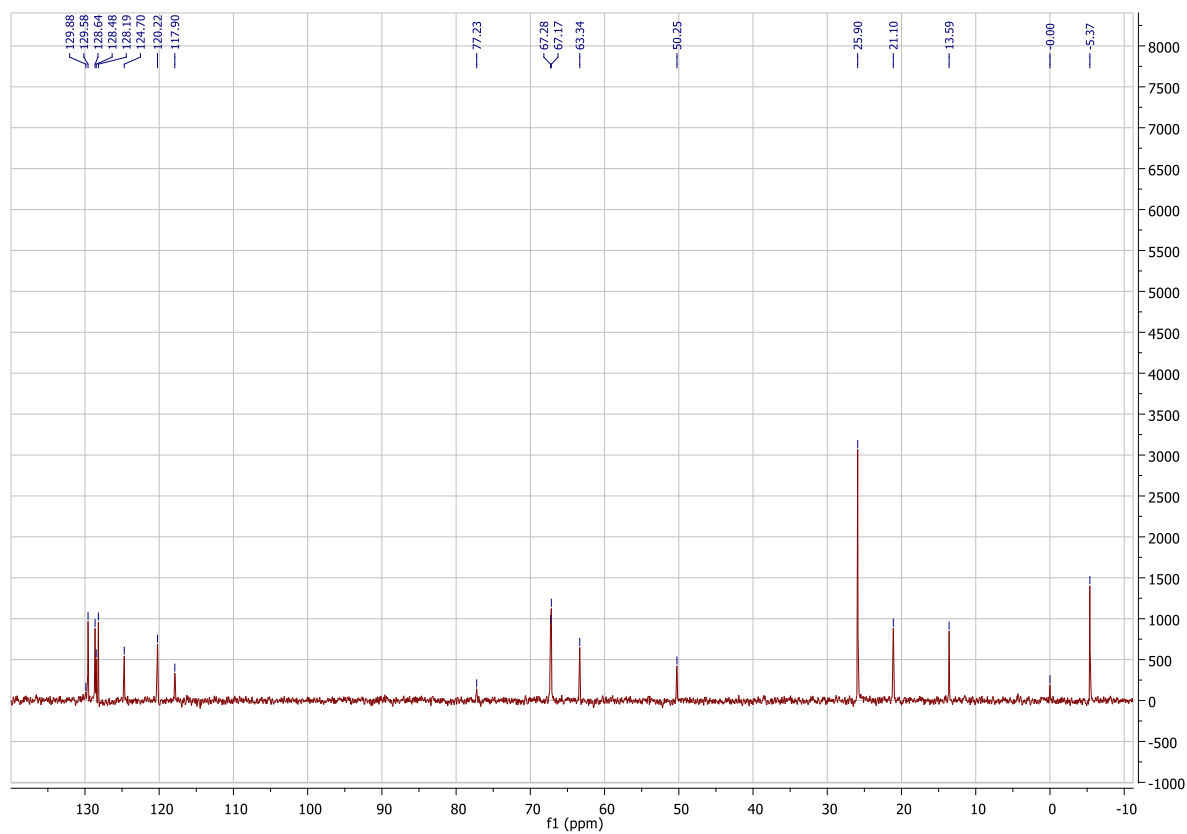

# HSQC

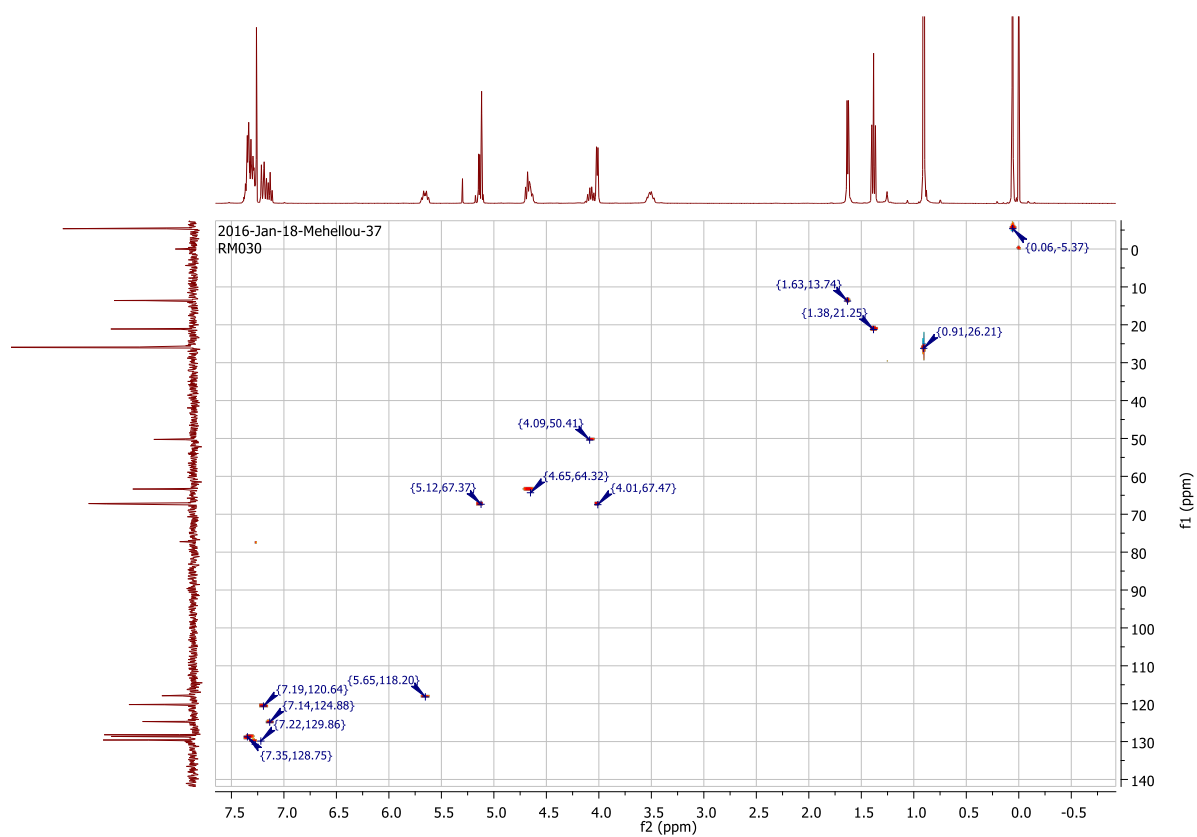

# <sup>31</sup>P NMR

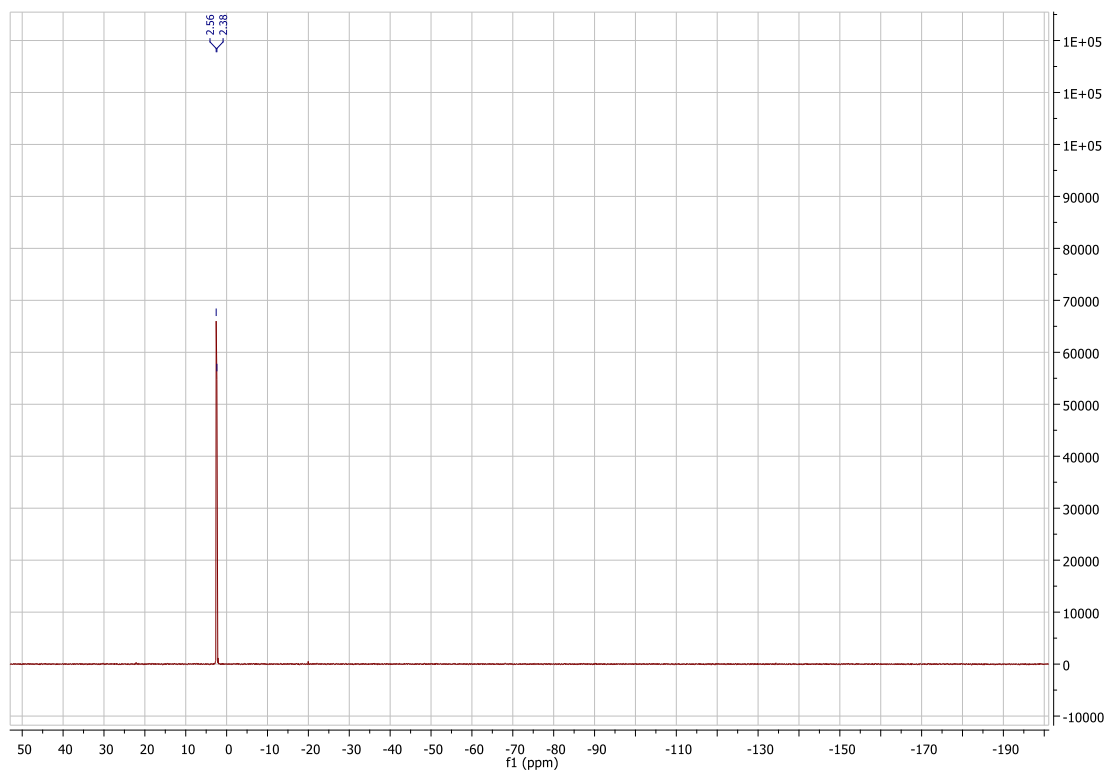

**Isopropyl (((E)-4-((tert-butyldimethylsilyl)oxy)-3-methylbut-2-en-1-yl)oxy)(phenoxy)phosphoryl)-L-alaninate, 5c:**

<sup>1</sup>H NMR

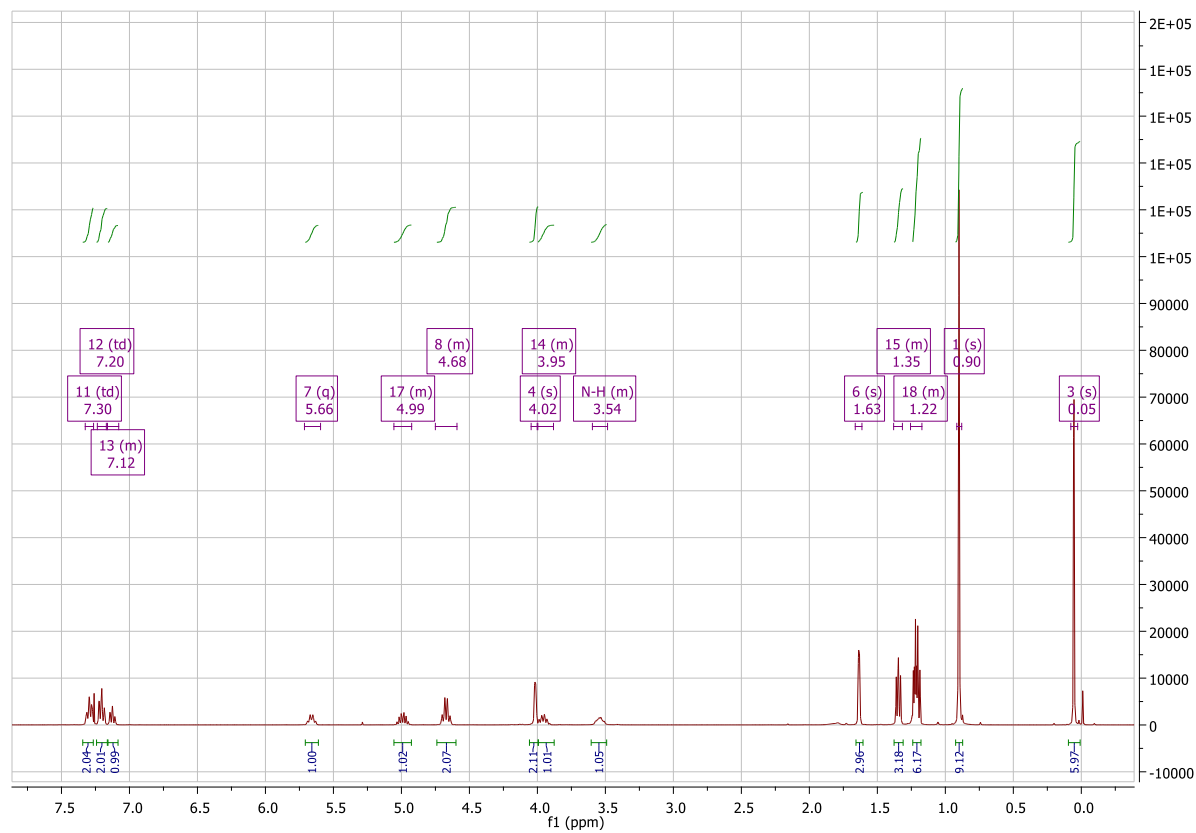

<sup>13</sup>C NMR

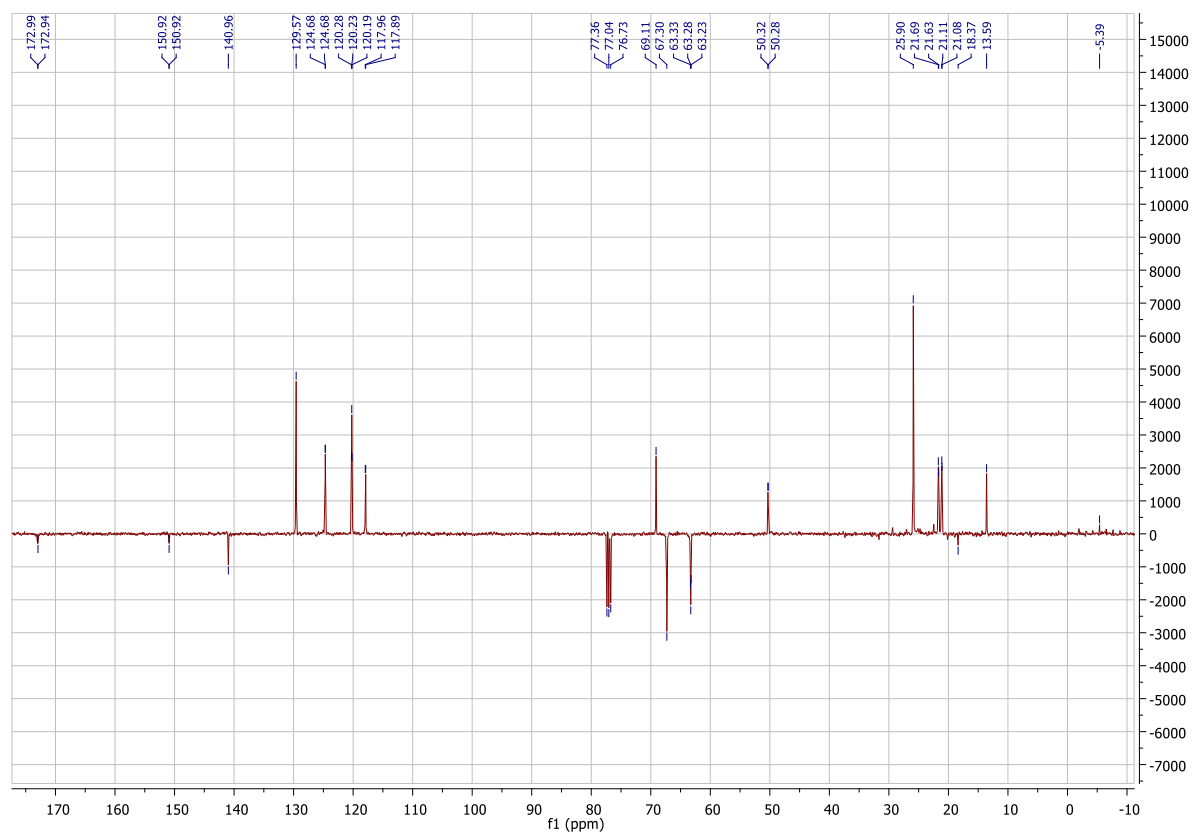

# <sup>1</sup>H COSY

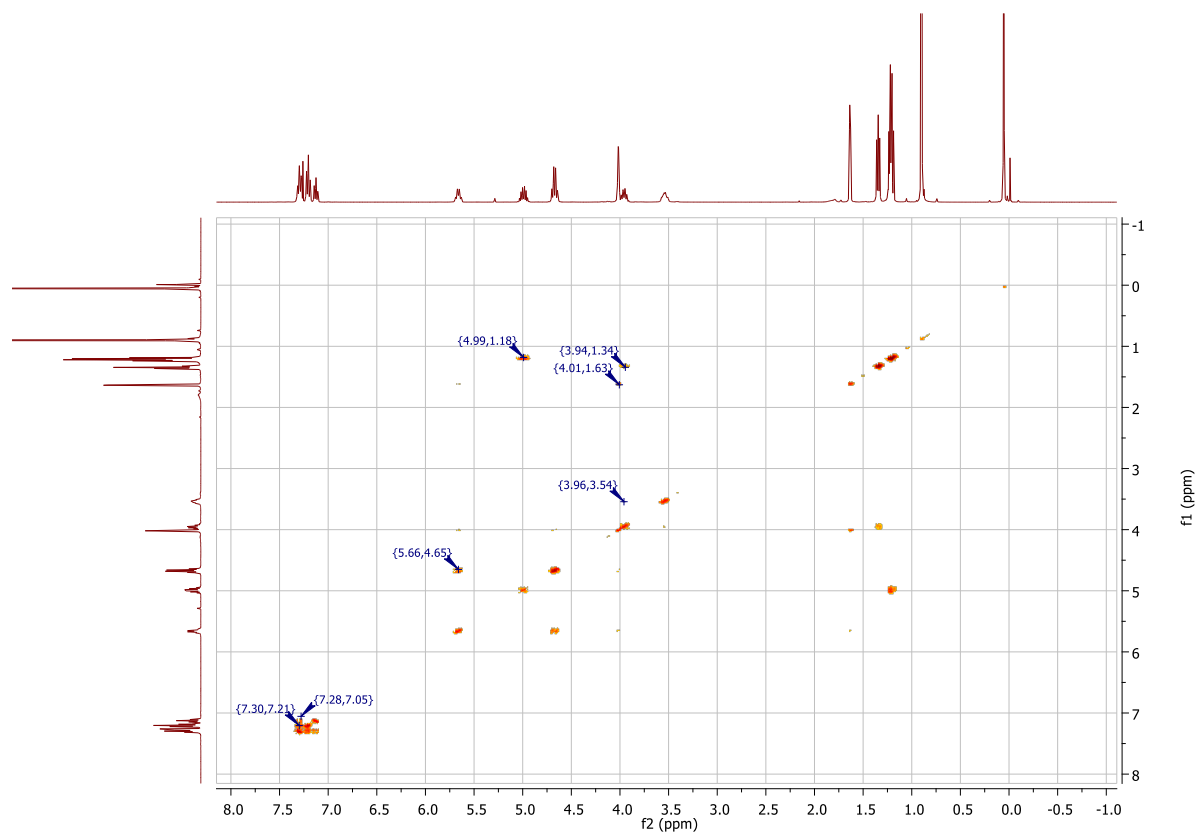

# <sup>13</sup>C DEPT-45

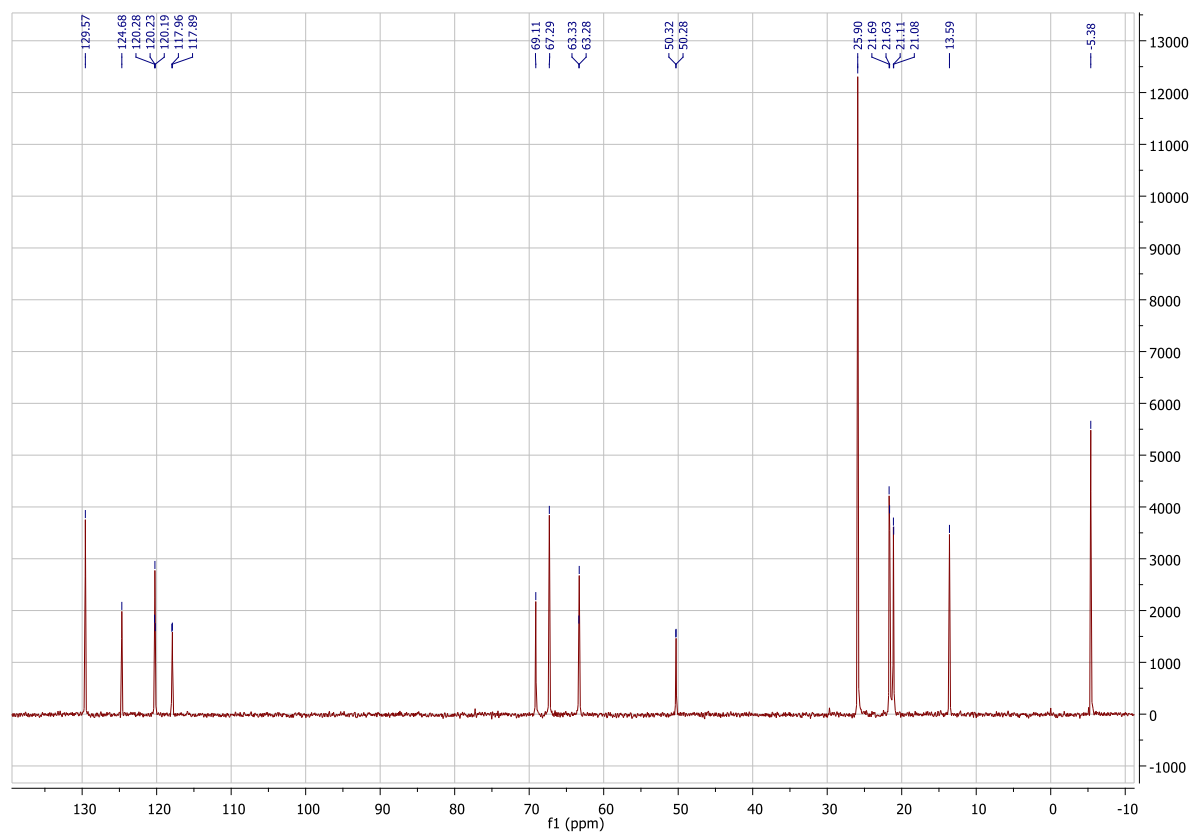

# HSQC

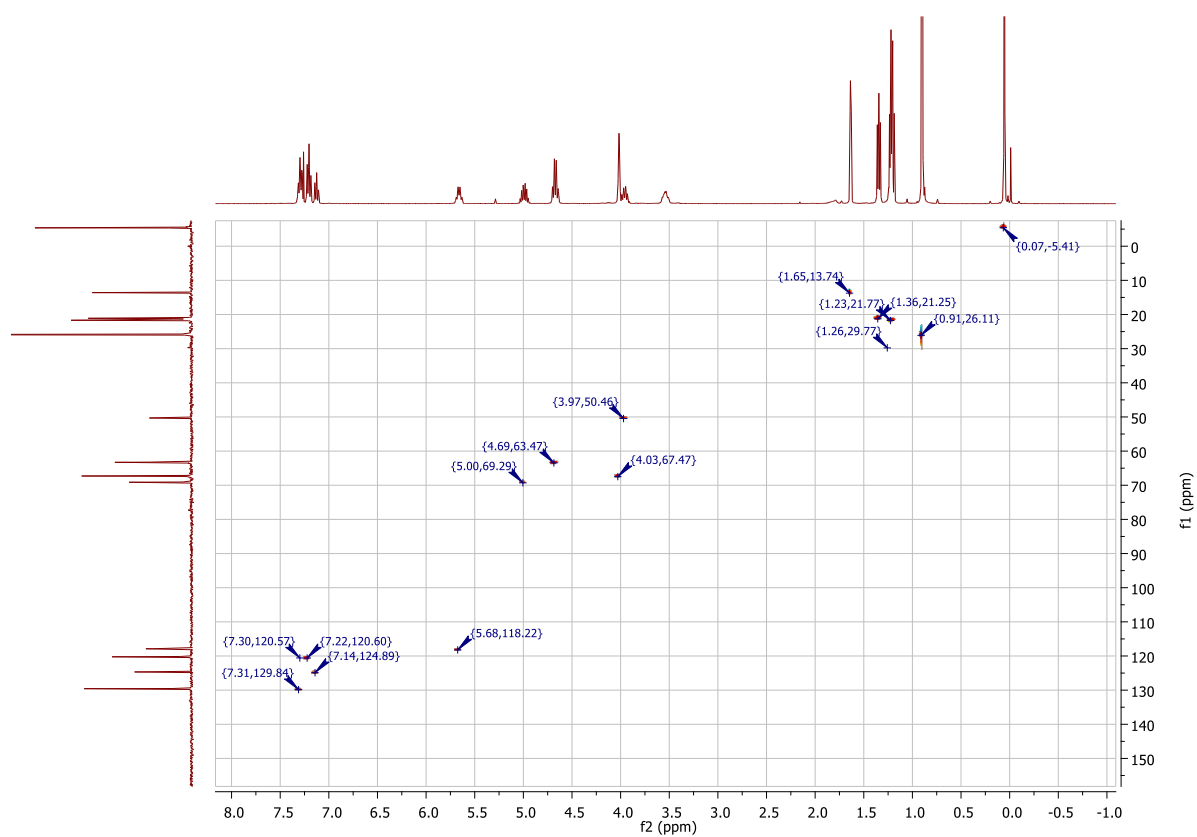

# $^{31}\text{P}$ NMR

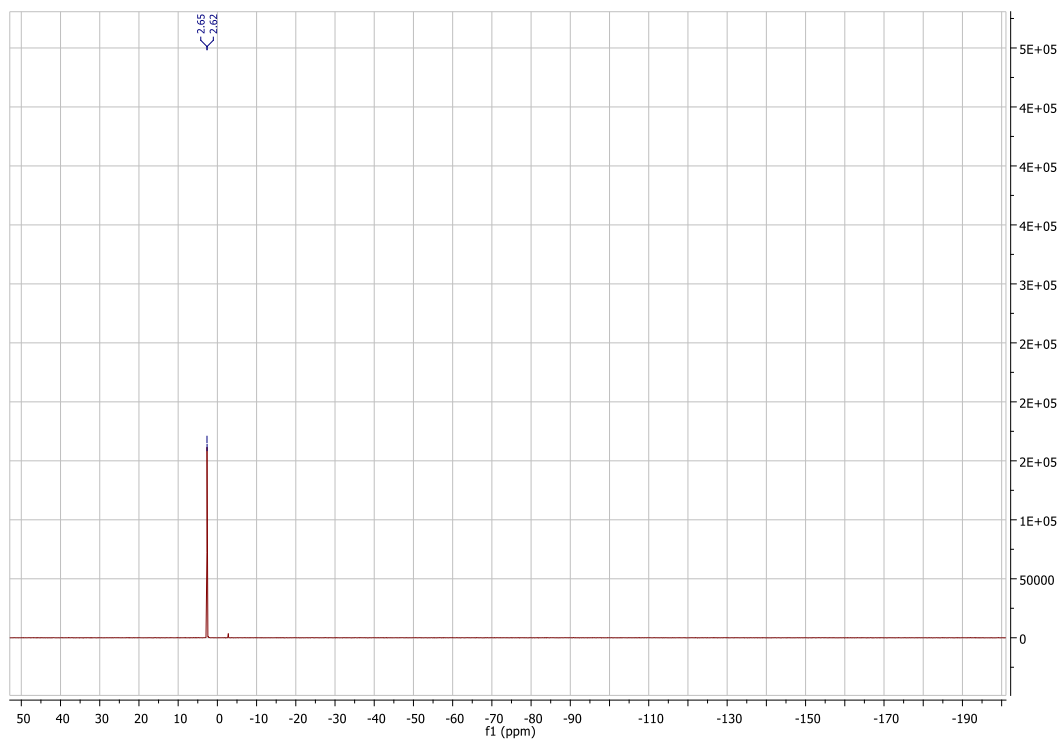

**Tert-butyl (((E)-4-((tert-butyldimethylsilyl)oxy)-3-methylbut-2-en-1-yl)oxy)(phenoxy)phosphoryl)-L-alaninate, 5d:**  
<sup>1</sup>H NMR

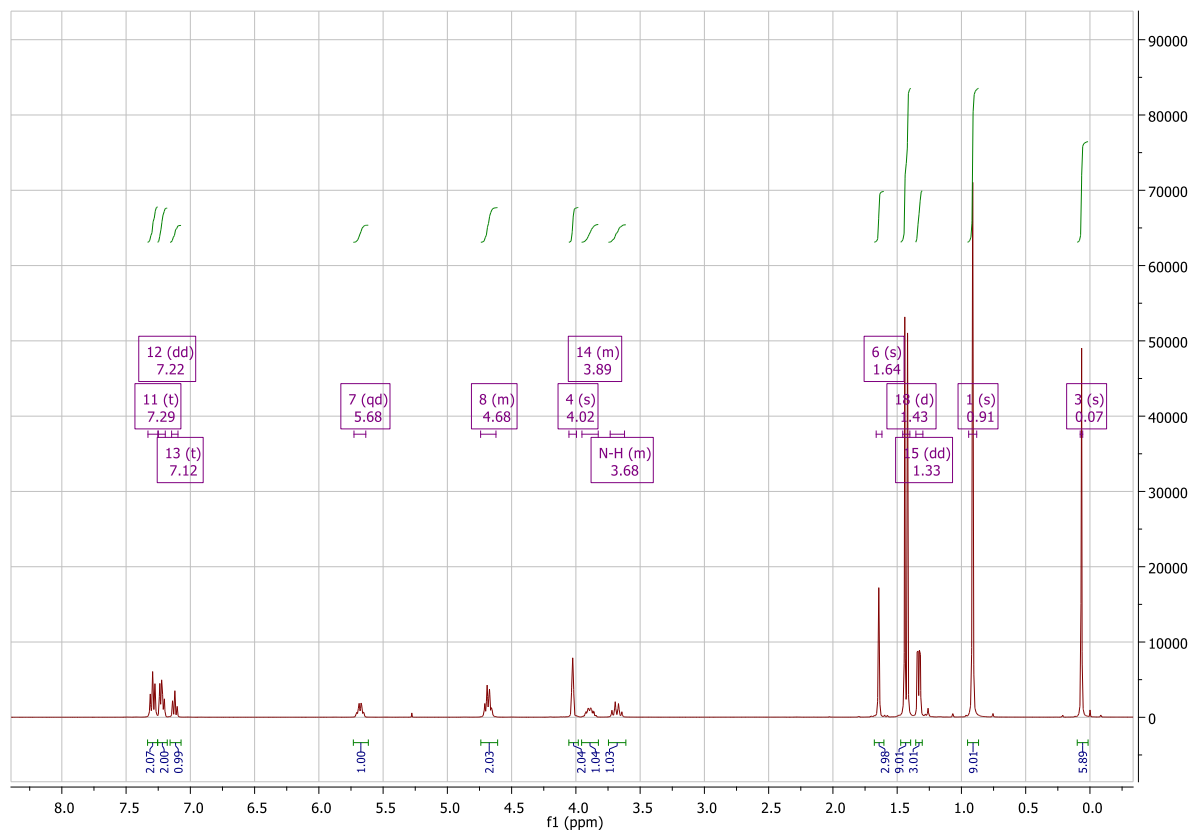

<sup>13</sup>C NMR

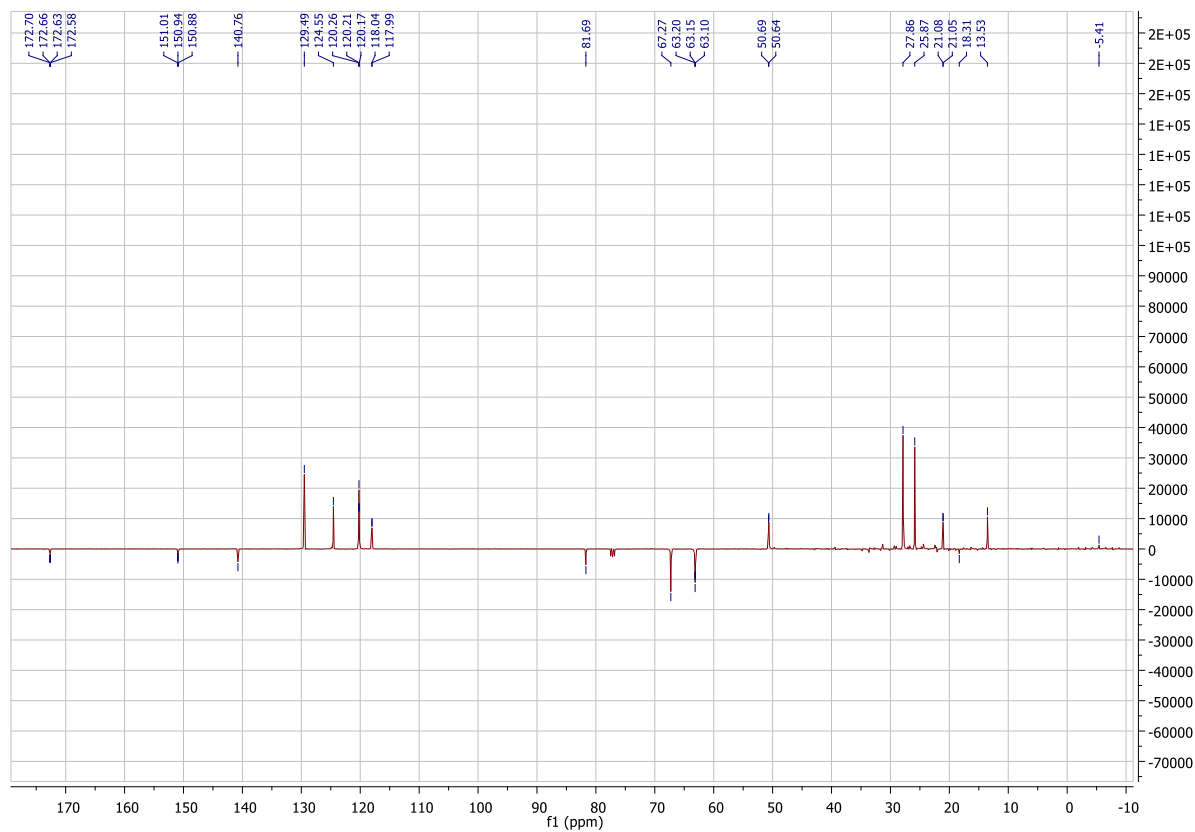

# $^1\text{H}$ COSY

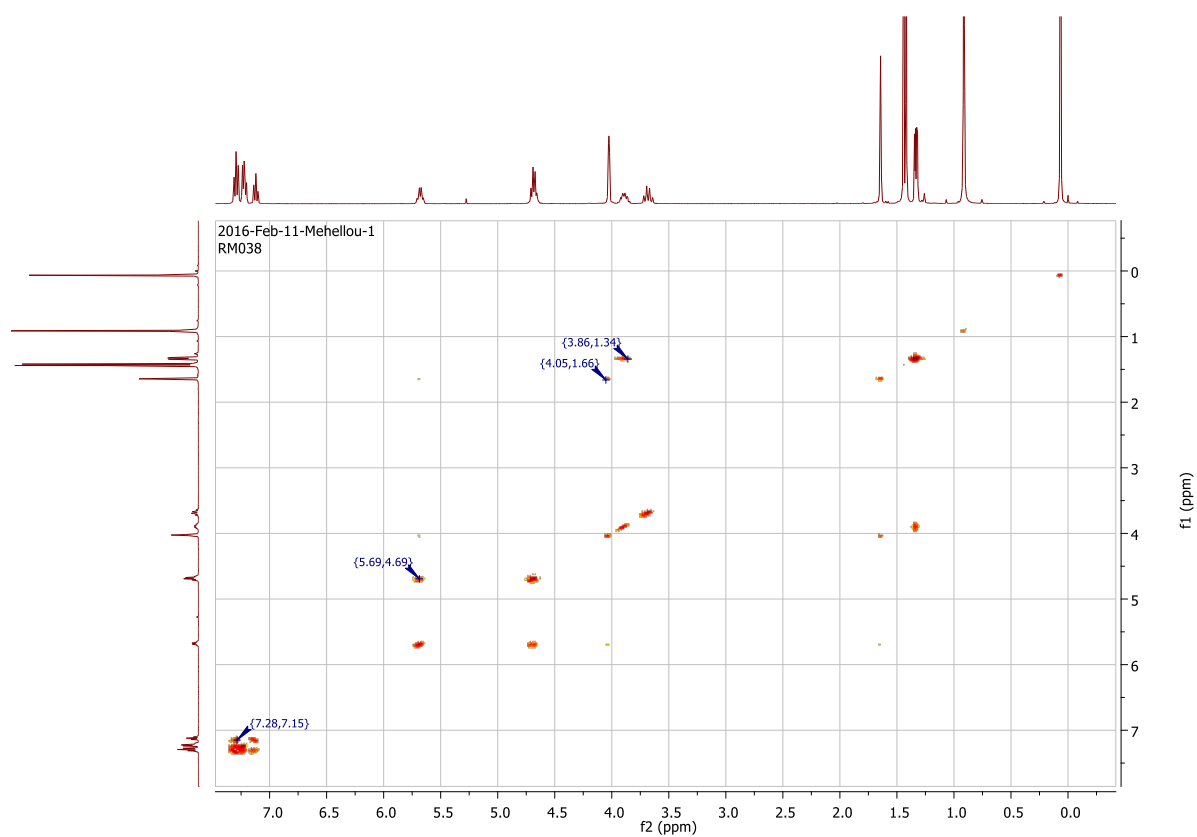

# $^{13}\text{C}$ DEPT-45

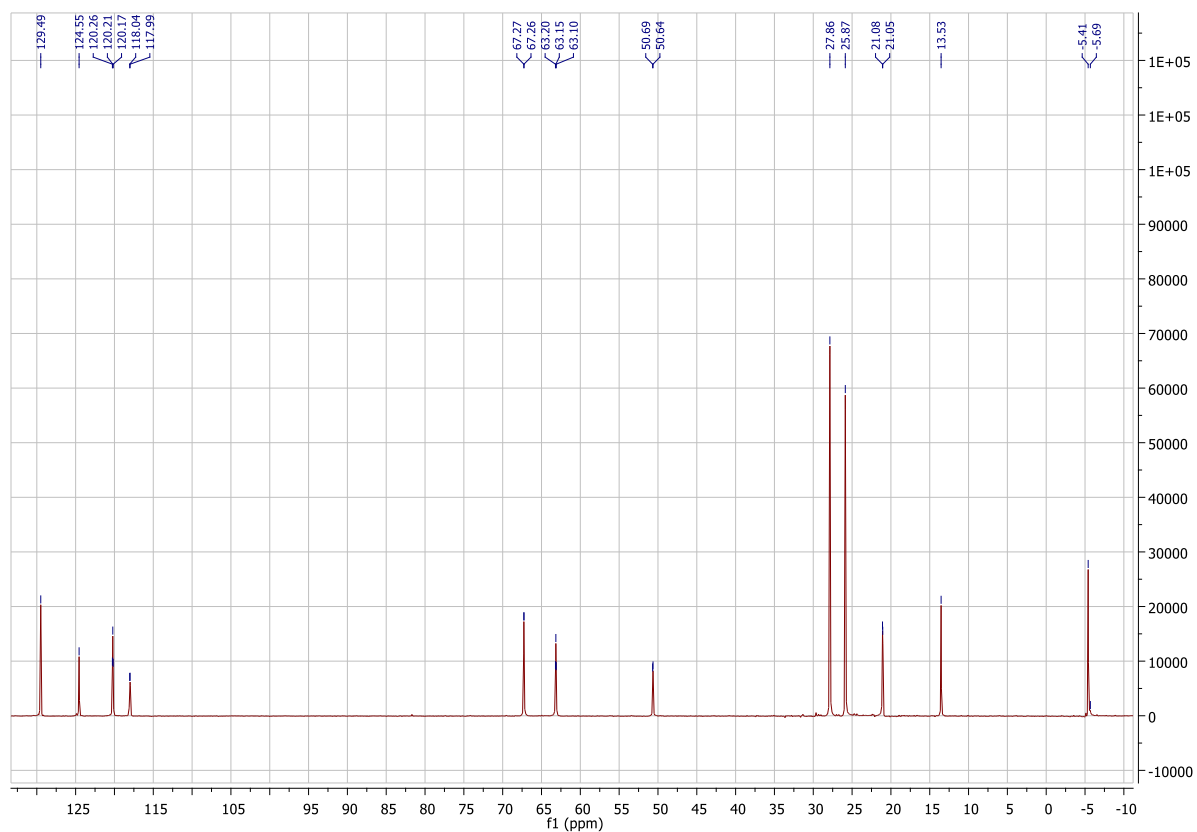

# HSQC

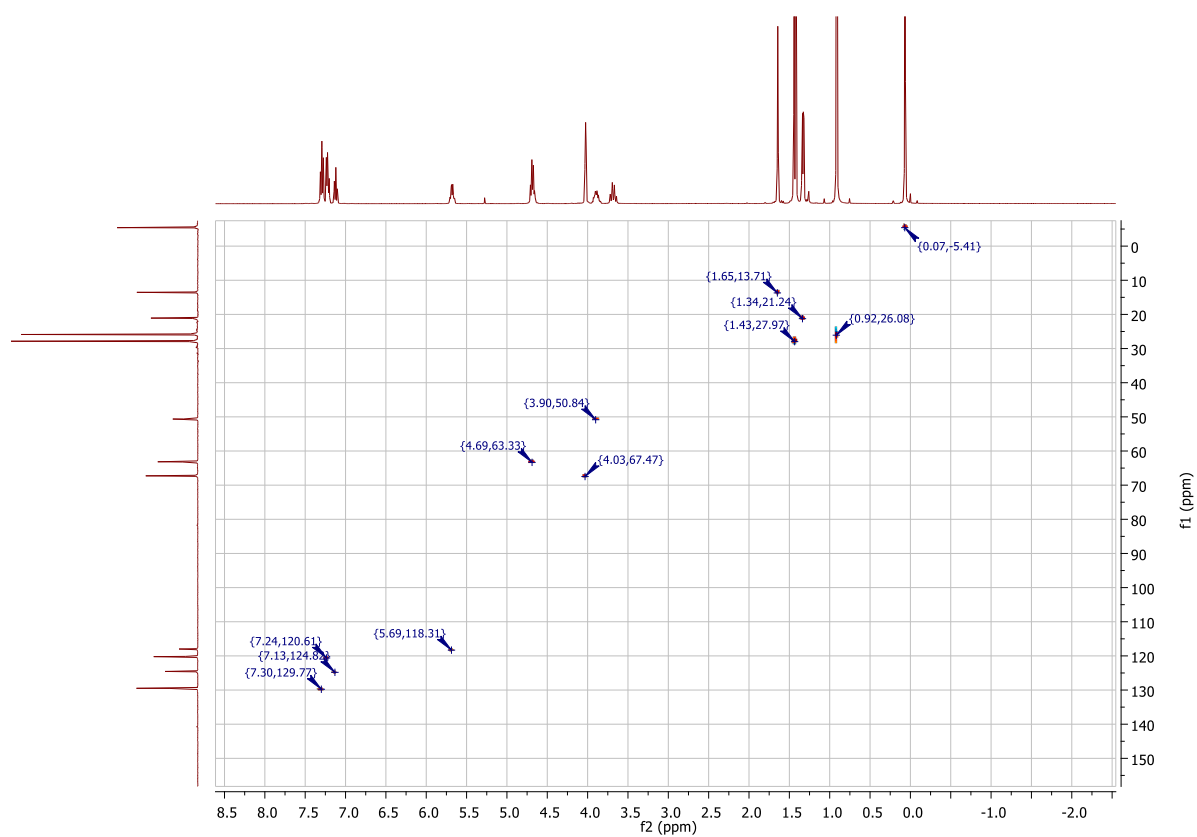

# $^{31}\text{P}$ NMR

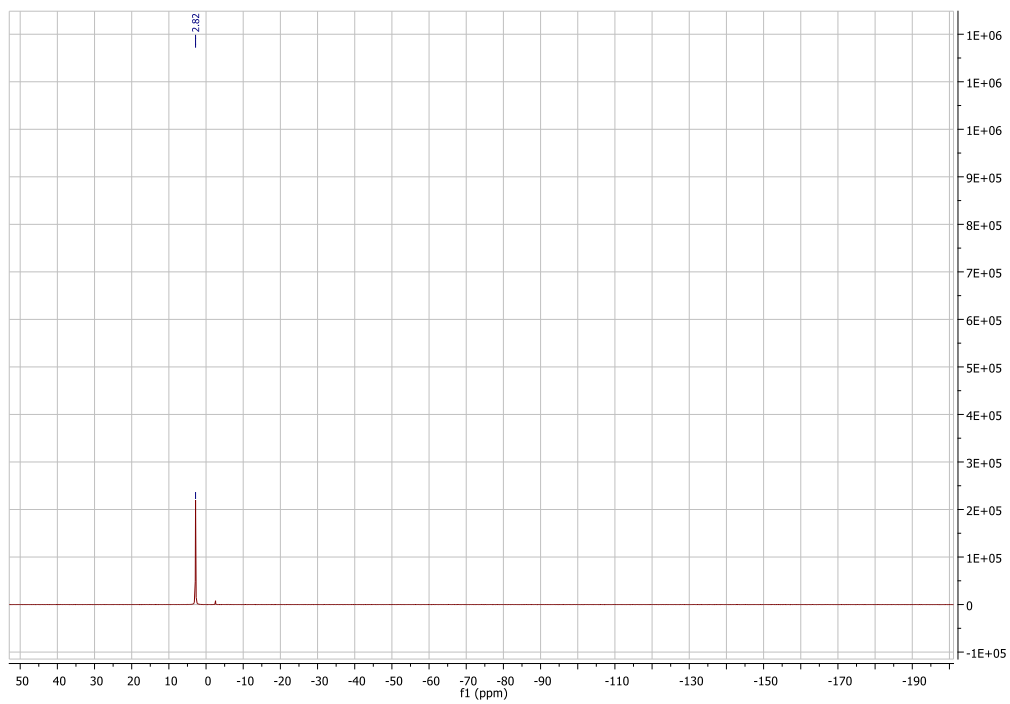



**Methyl (((E)-4-hydroxy-3-methylbut-2-en-1-yl)oxy)(phenoxy)phosphoryl)-L-alaninate, 6a:**  
<sup>1</sup>H NMR

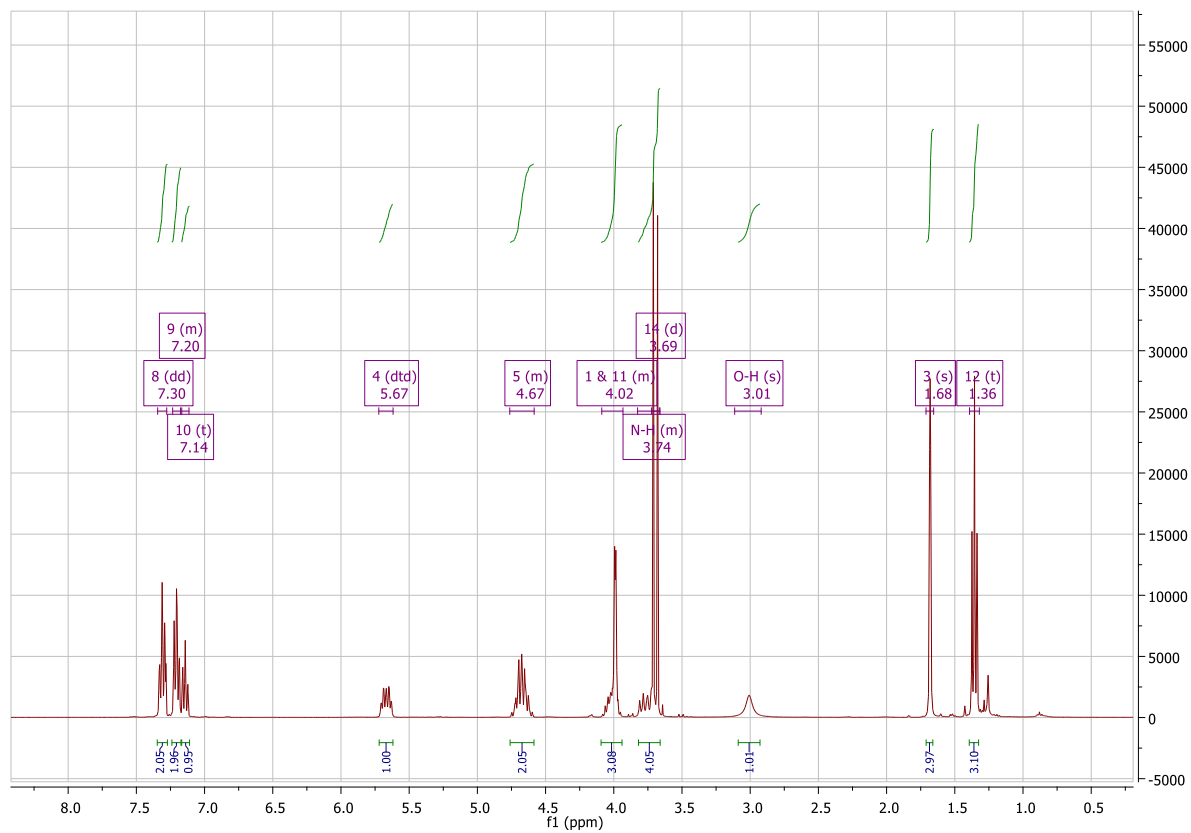

<sup>13</sup>C NMR

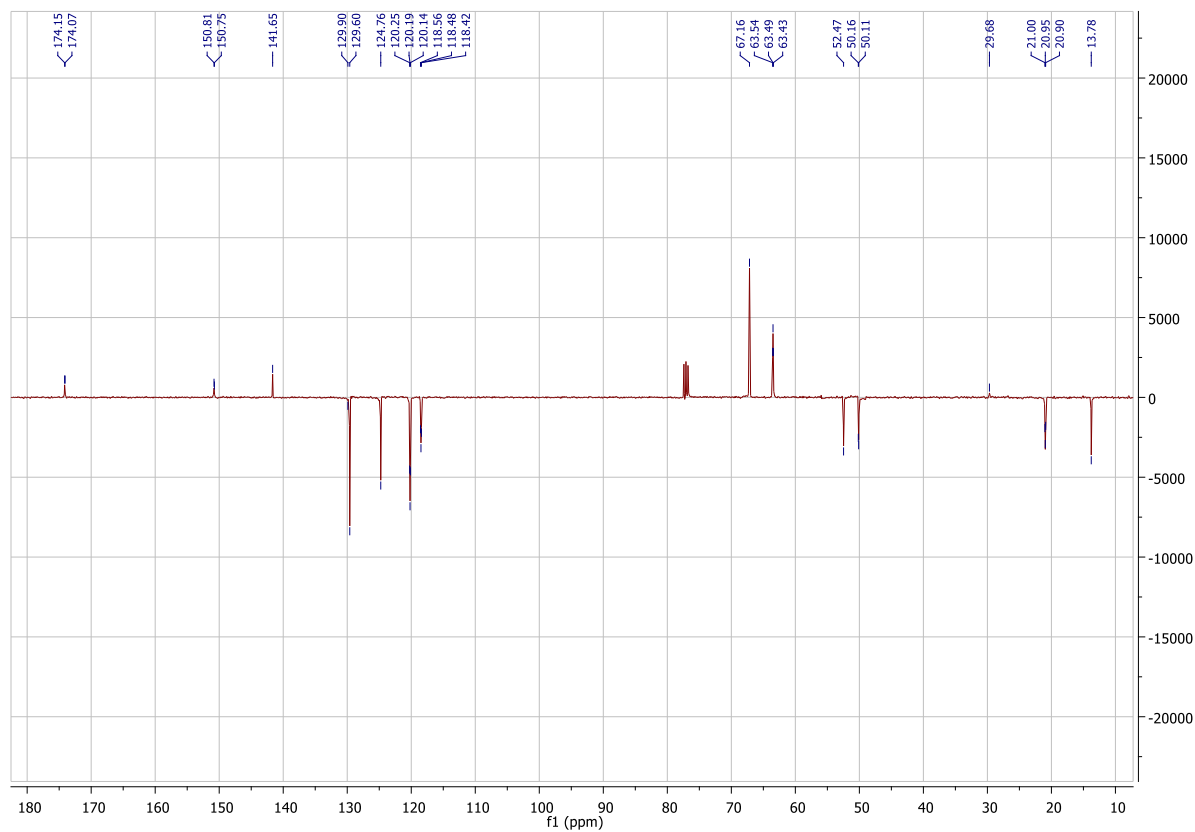

# <sup>1</sup>H COSY

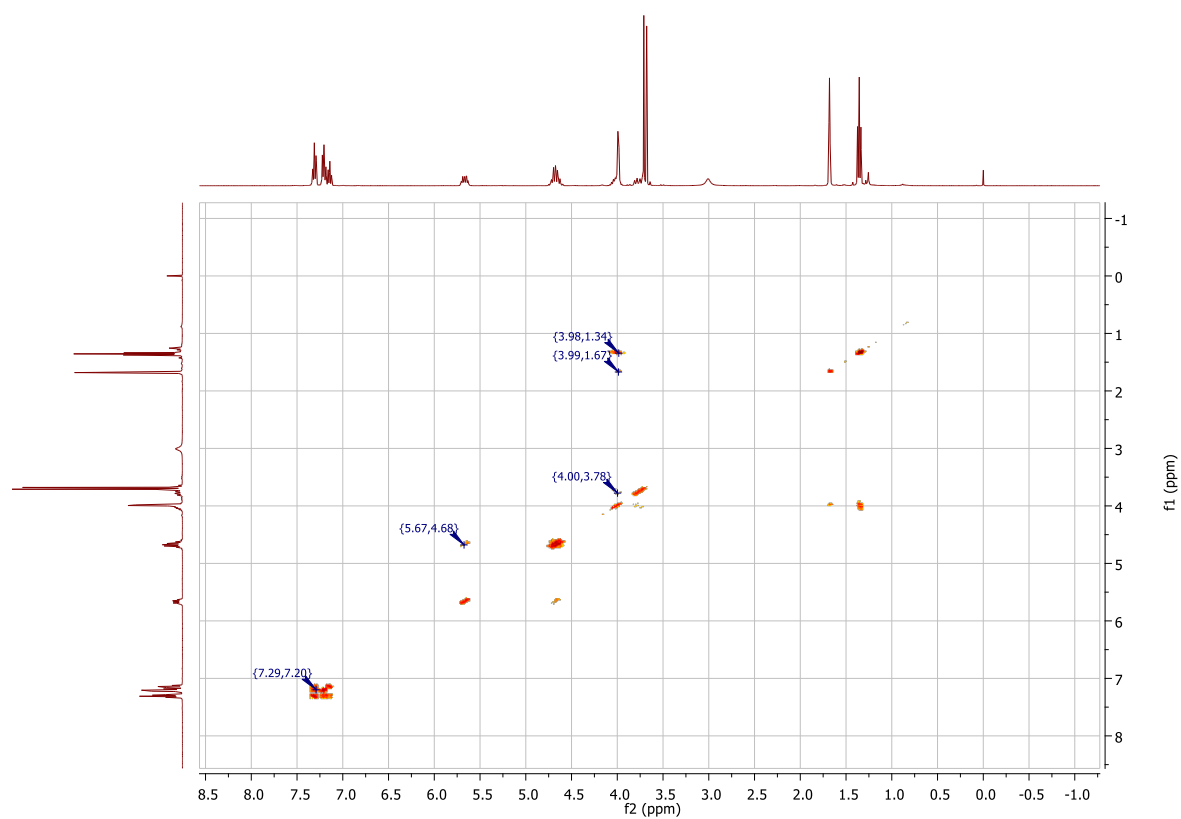

# <sup>13</sup>C DEPT-45

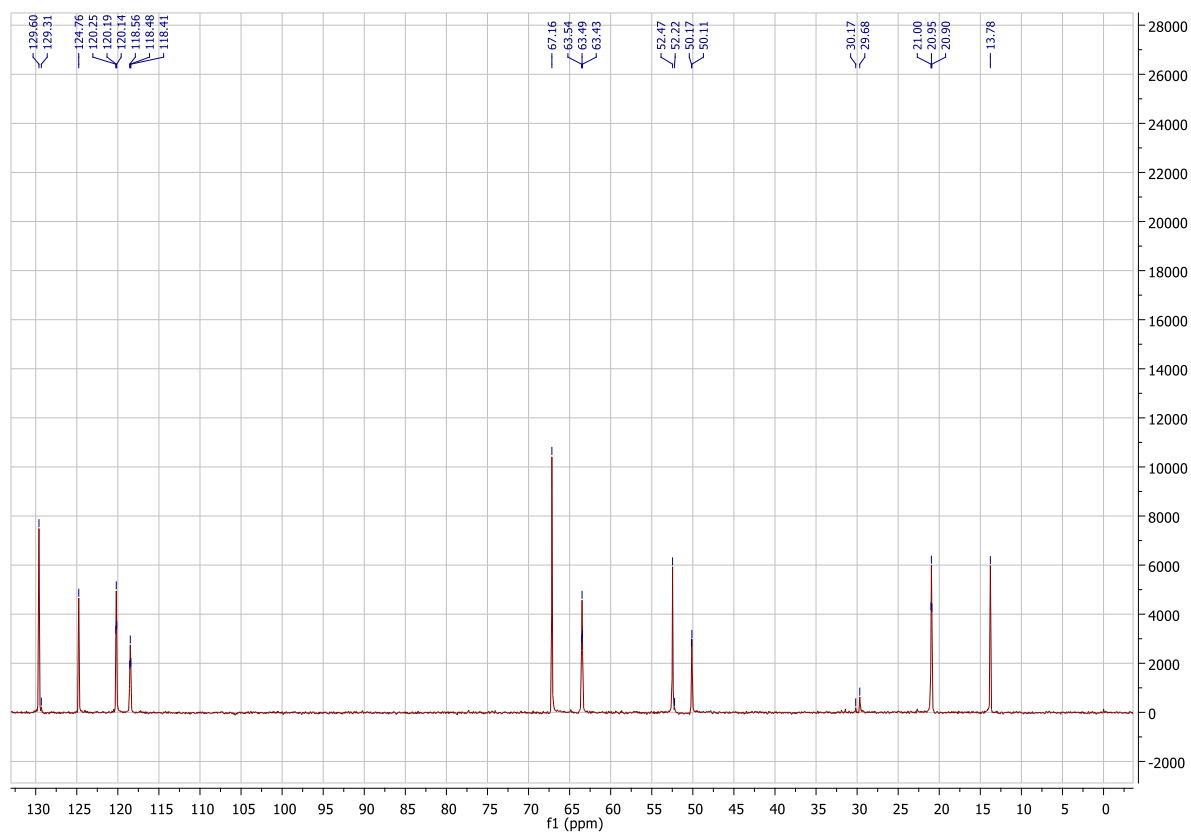

# HSQC

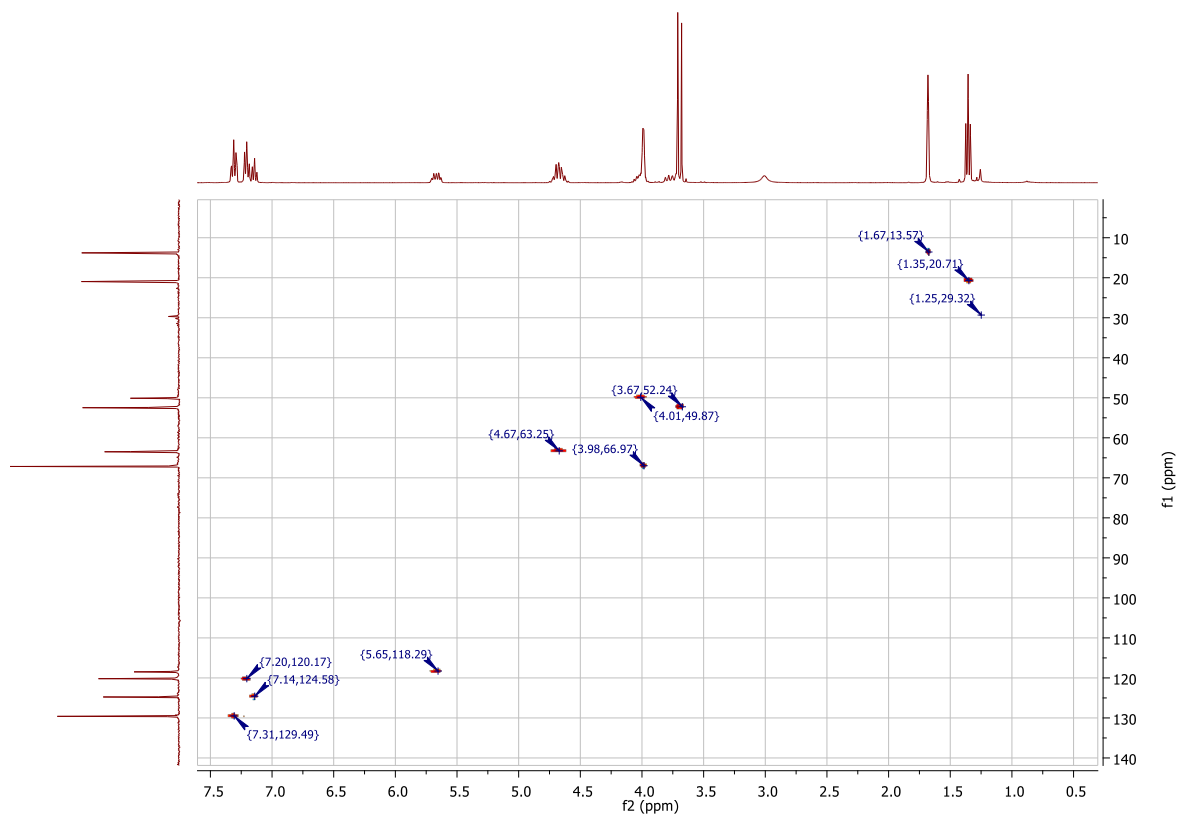

# $^{31}\text{P}$ NMR

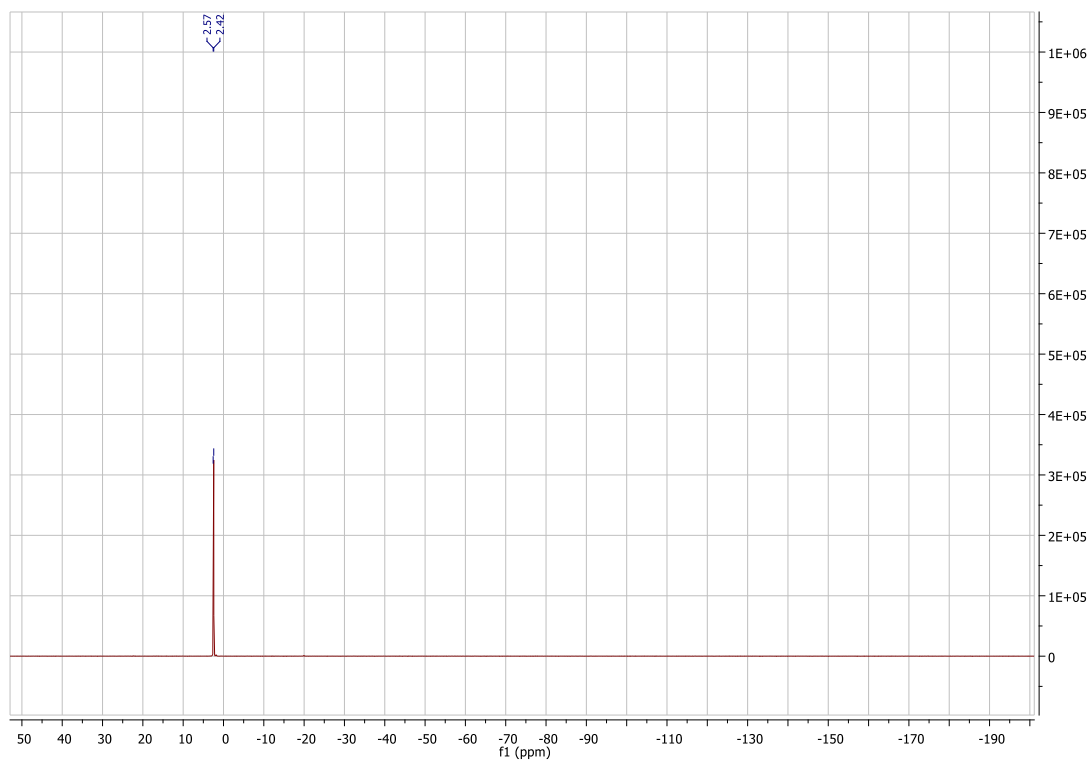

**Benzyl (((E)-4-hydroxy-3-methylbut-2-en-1-yl)oxy)(phenoxy)phosphoryl)-L-alaninate, 6b:**  
<sup>1</sup>H NMR

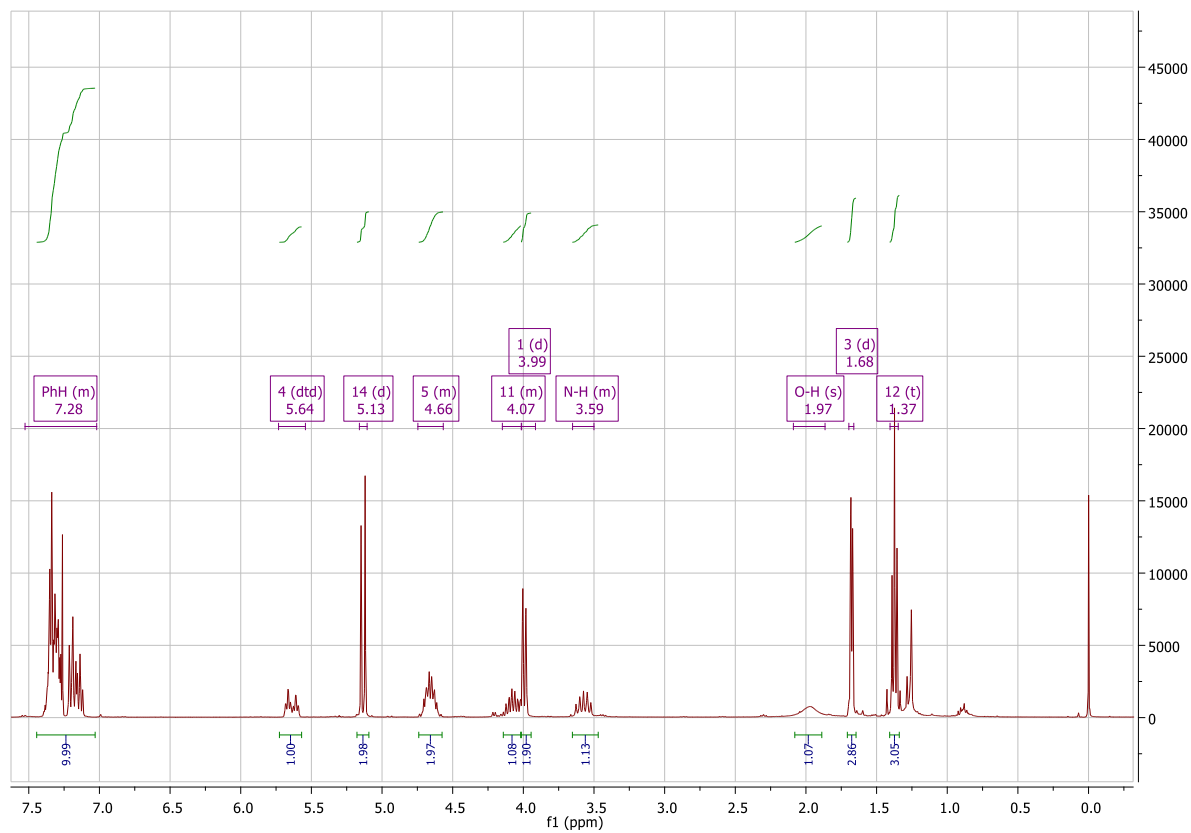

<sup>13</sup>C NMR

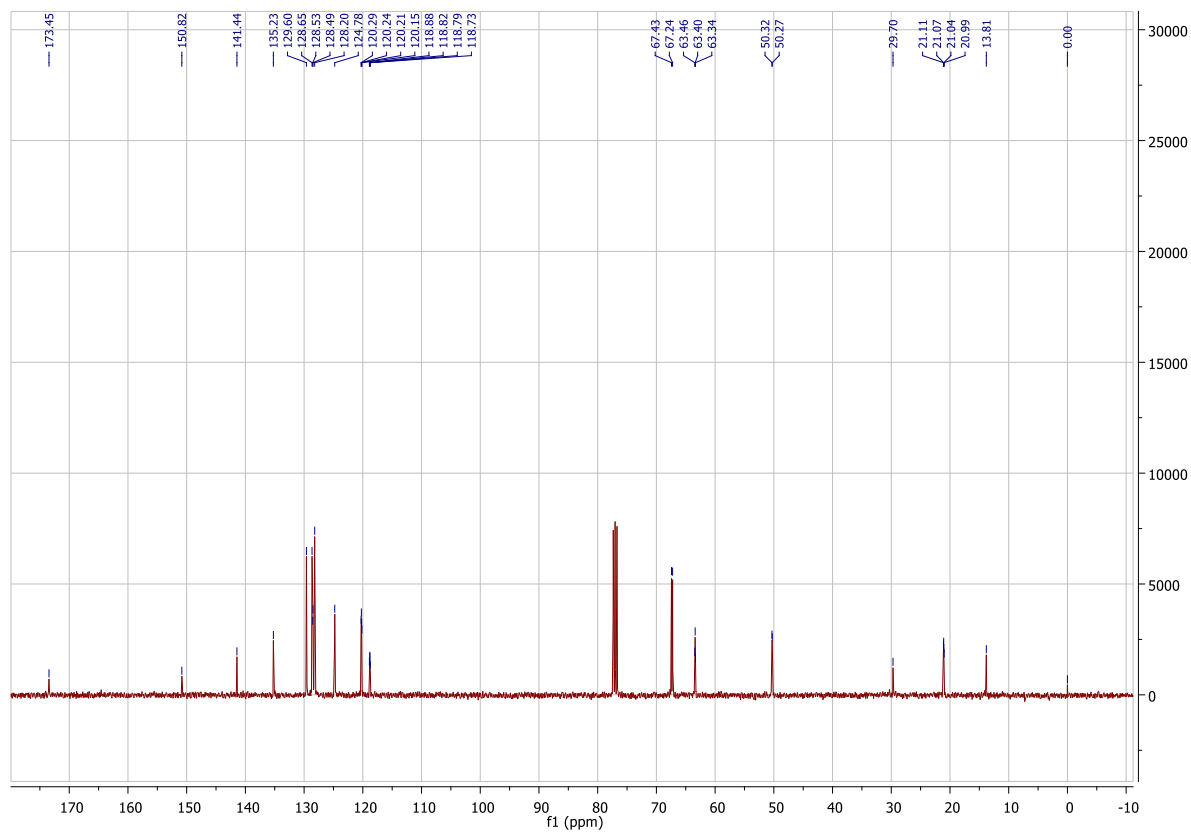

# $^1\text{H}$ COSY

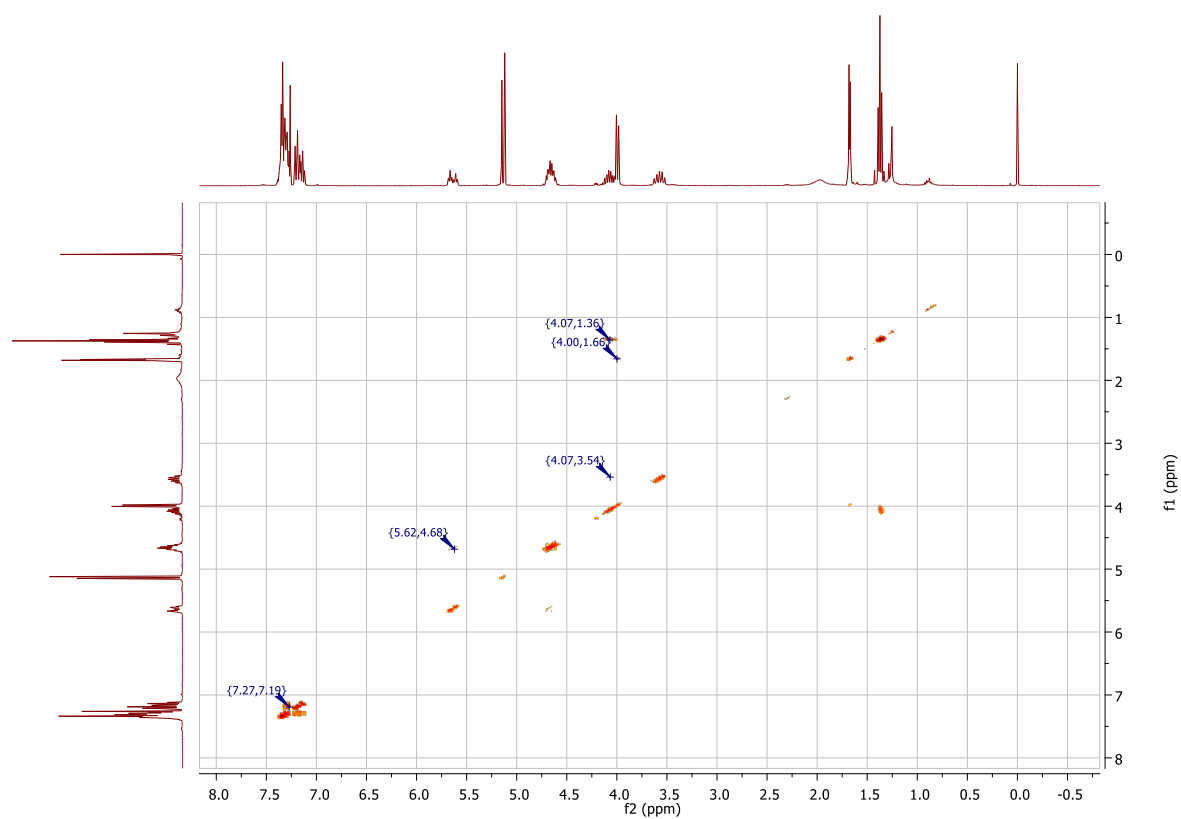

# $^{13}\text{C}$ DEPT-45

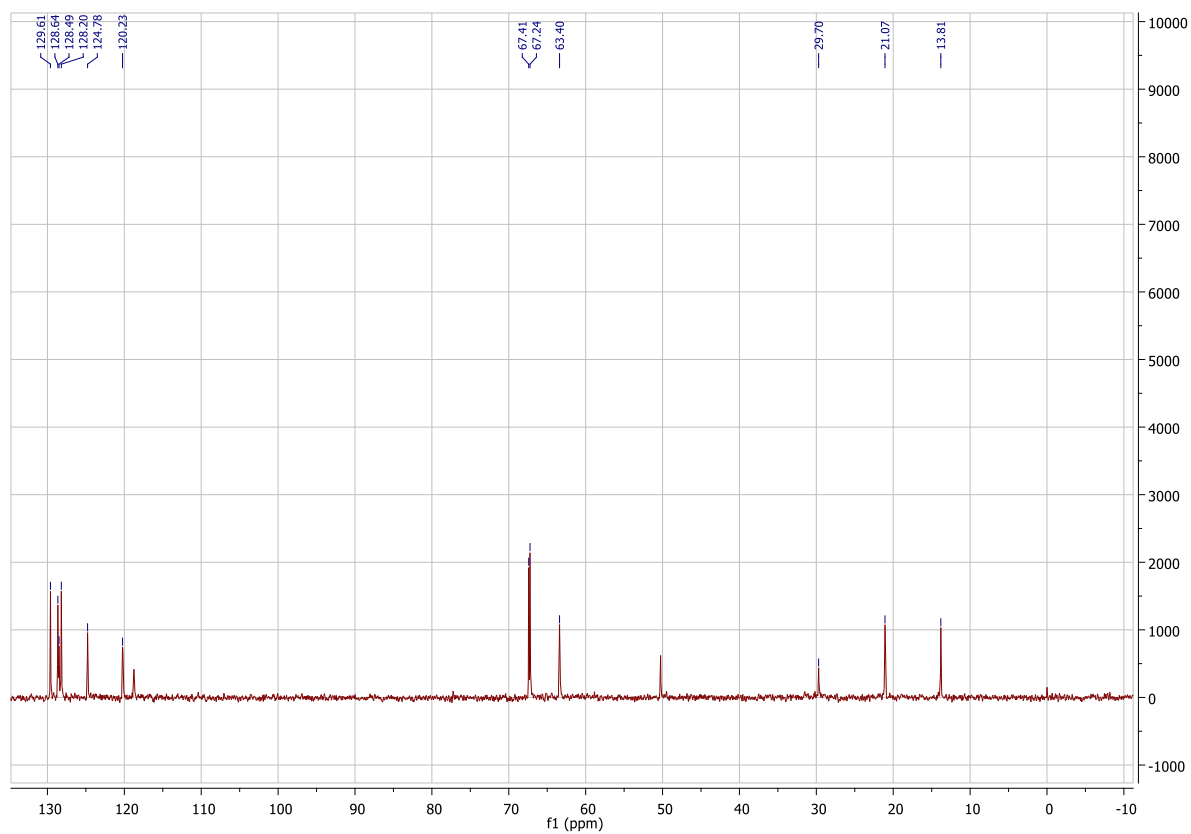

# HSQC

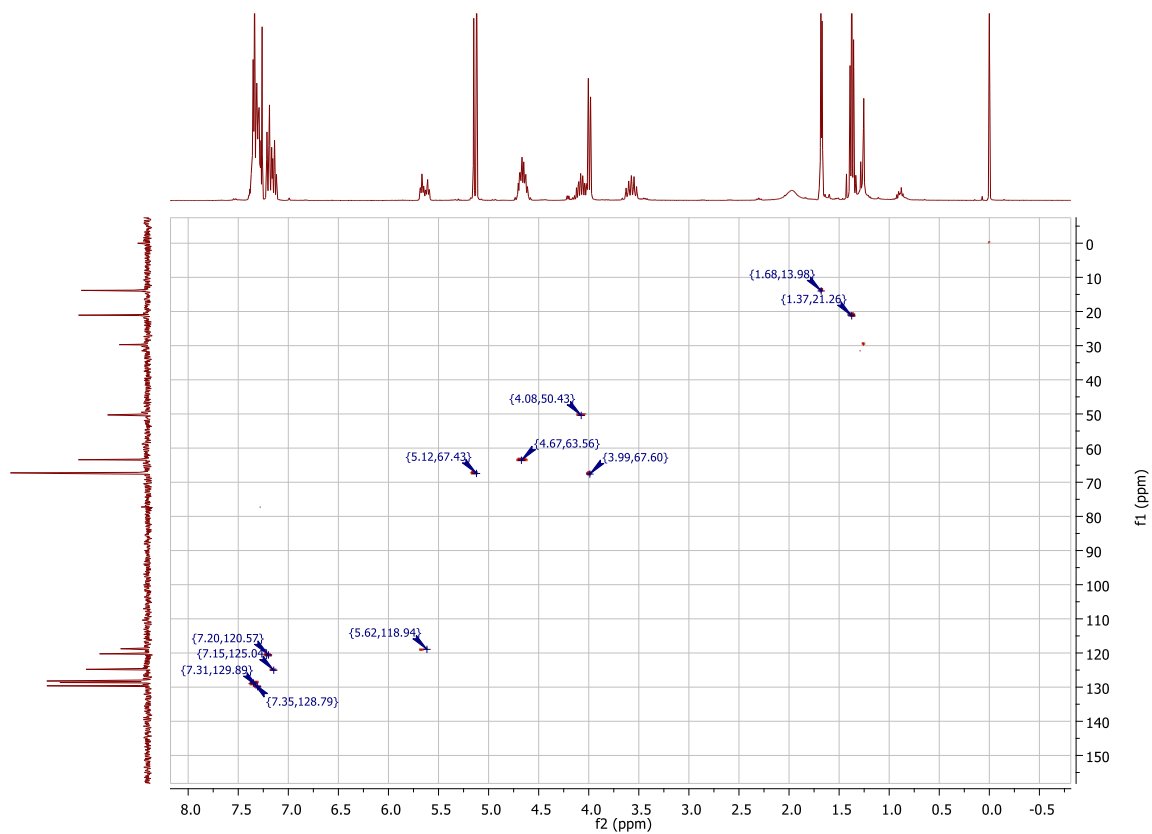

# $^{31}\text{P}$ NMR

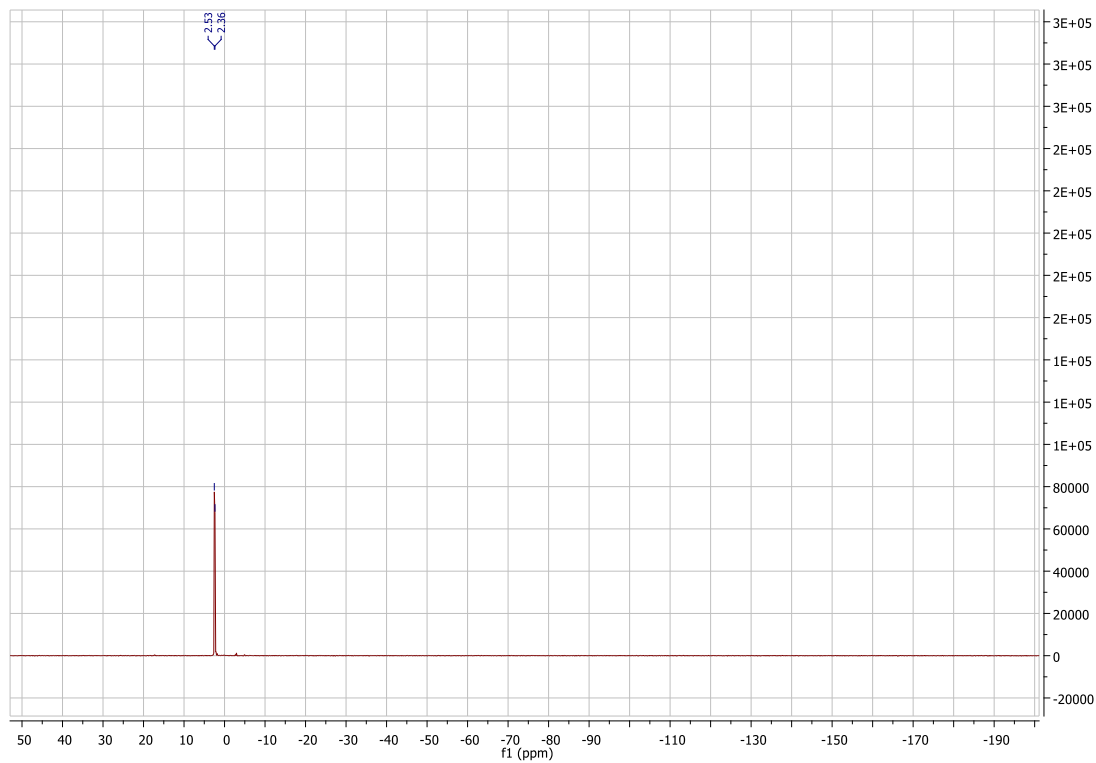

# Isopropyl (((*E*)-4-hydroxy-3-methylbut-2-en-1-yl)oxy)(phenoxy)phosphoryl)-L-alaninate, 6c:

<sup>1</sup>H NMR

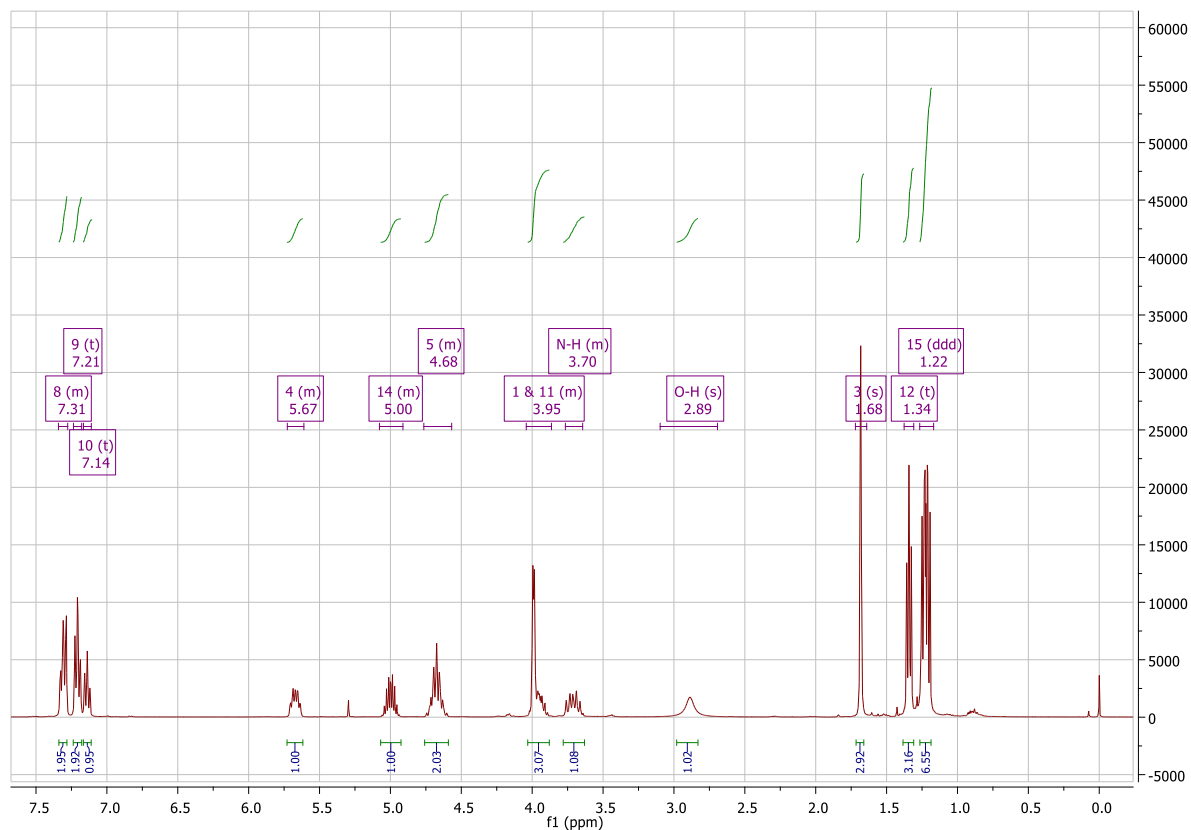

<sup>13</sup>C NMR

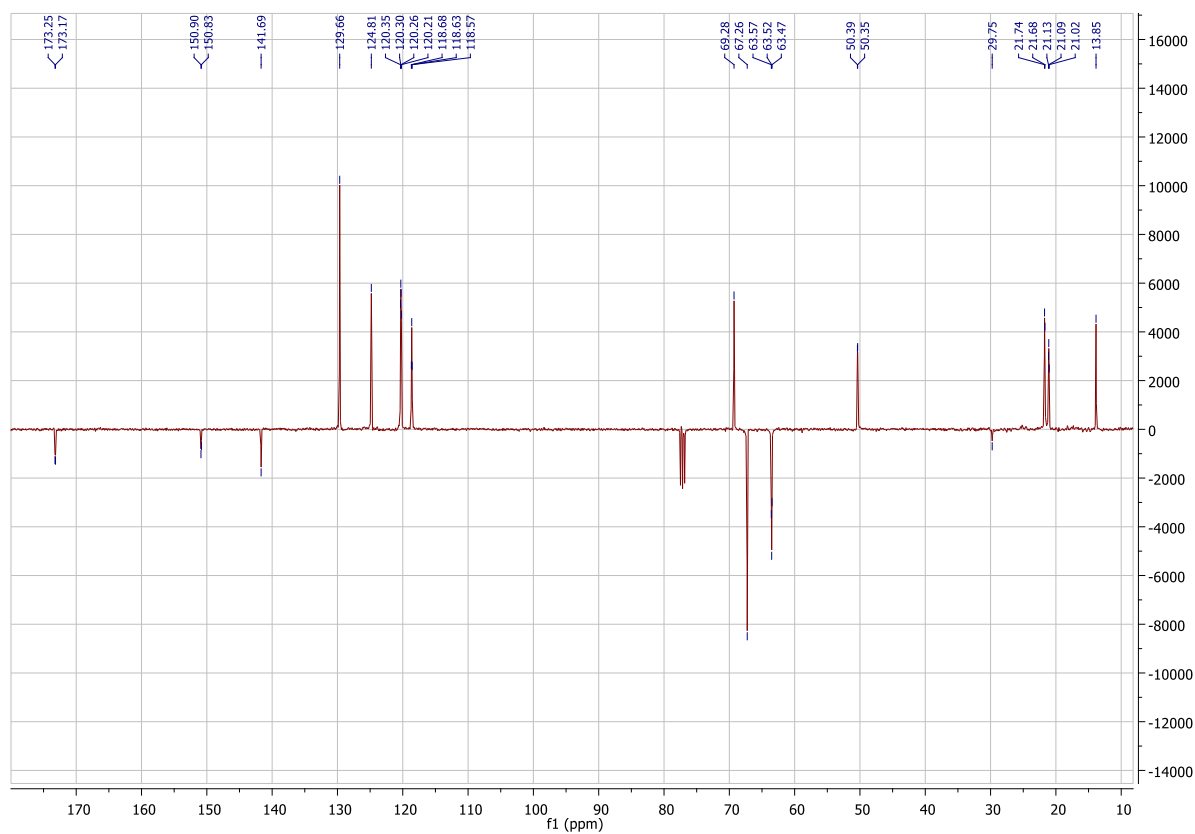

# <sup>1</sup>H COSY

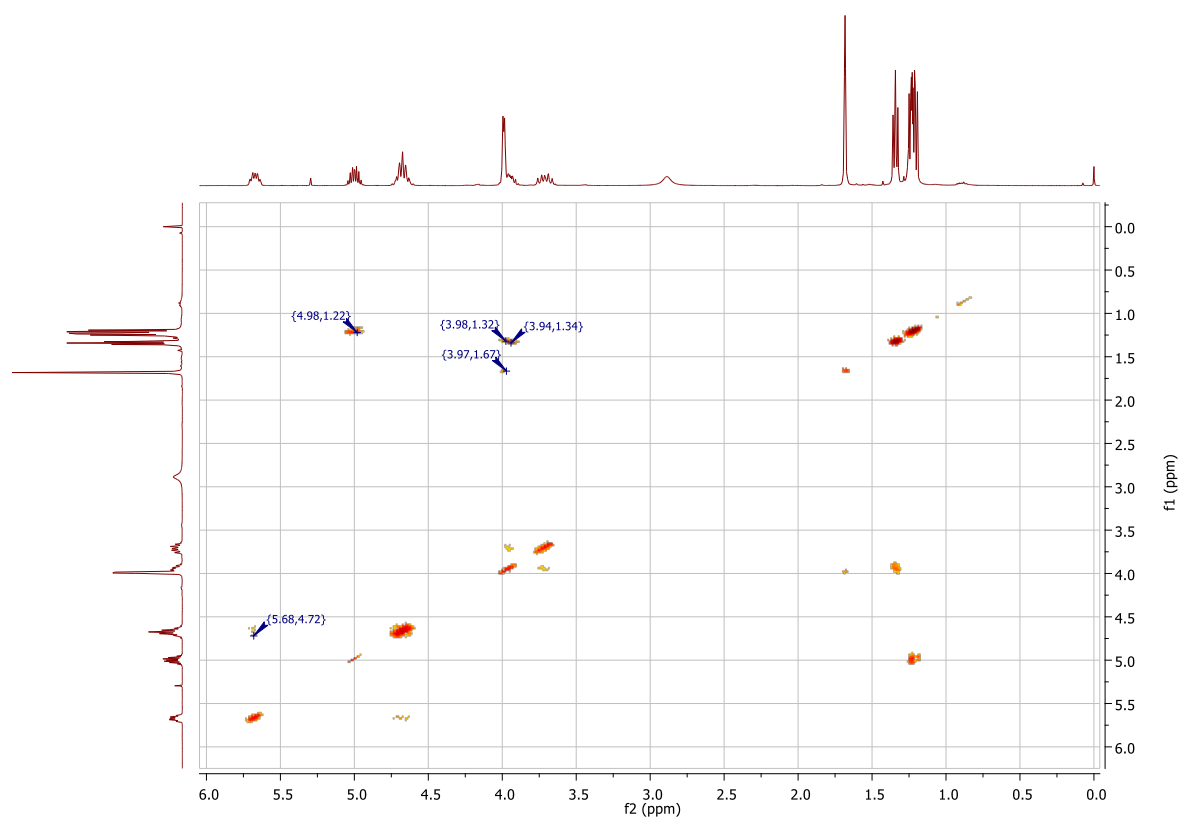

# <sup>13</sup>C DEPT-45

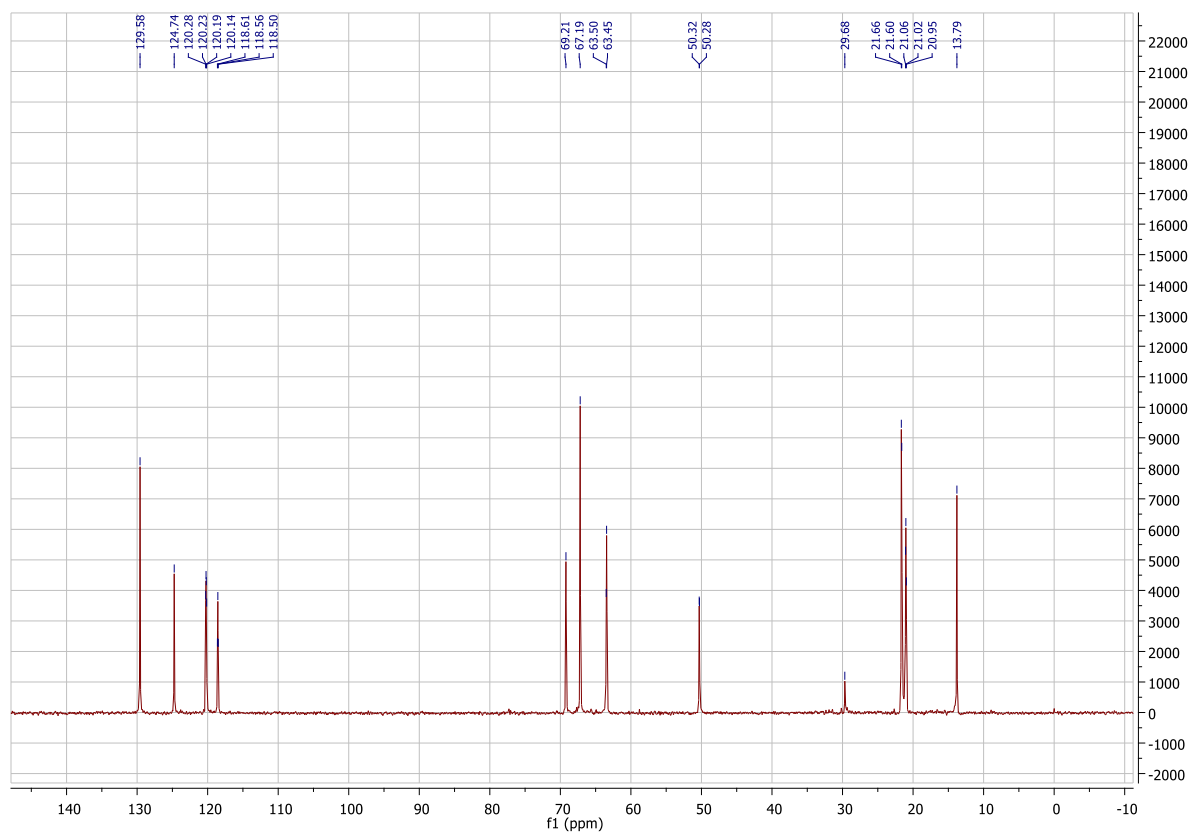



# HSQC

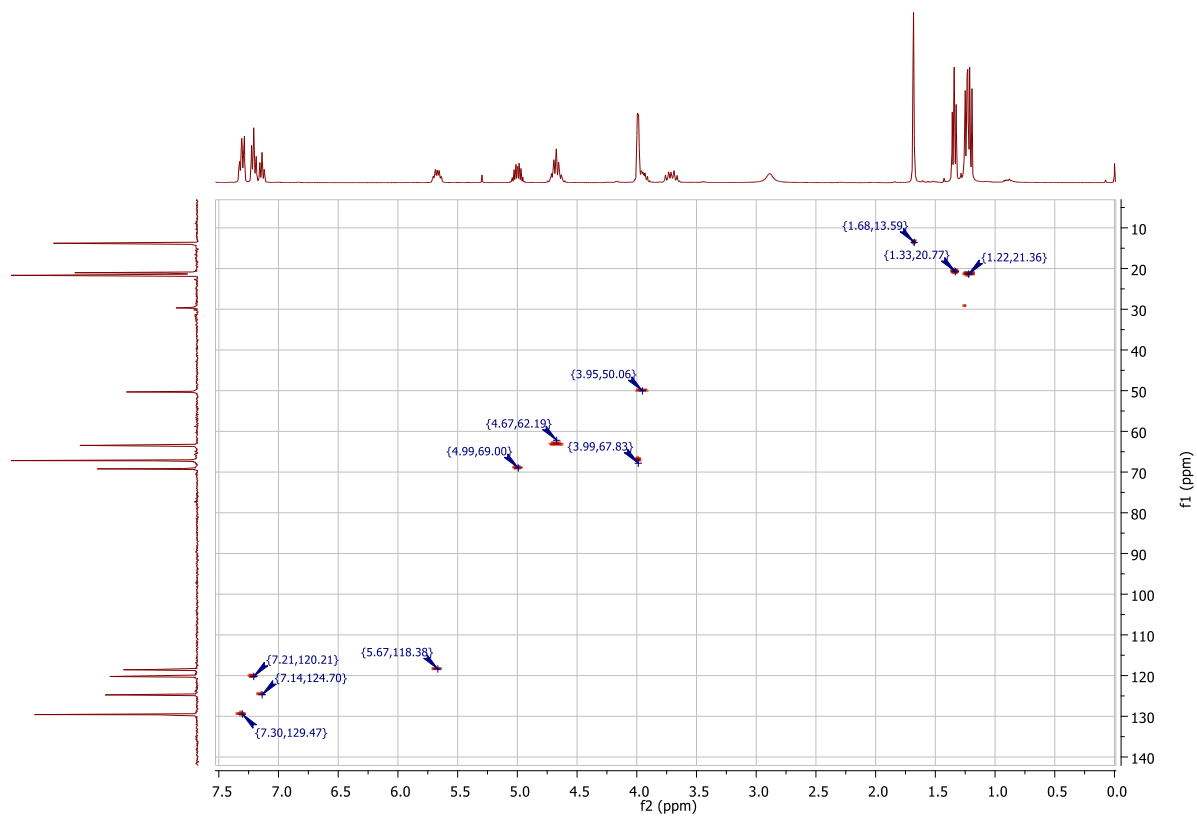

# $^{31}\text{P}$ NMR

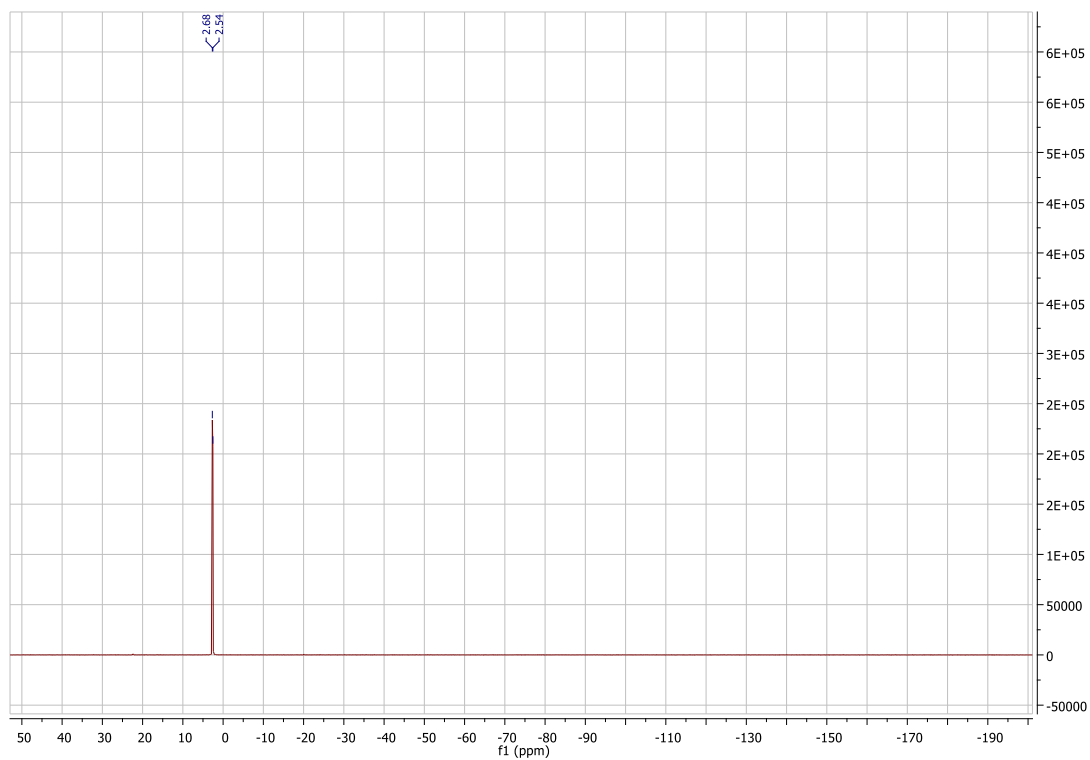

# Tert-butyl (((E)-4-hydroxy-3-methylbut-2-en-1-yl)oxy)(phenoxy)phosphoryl)-L-alaninate, 6d:

<sup>1</sup>H NMR

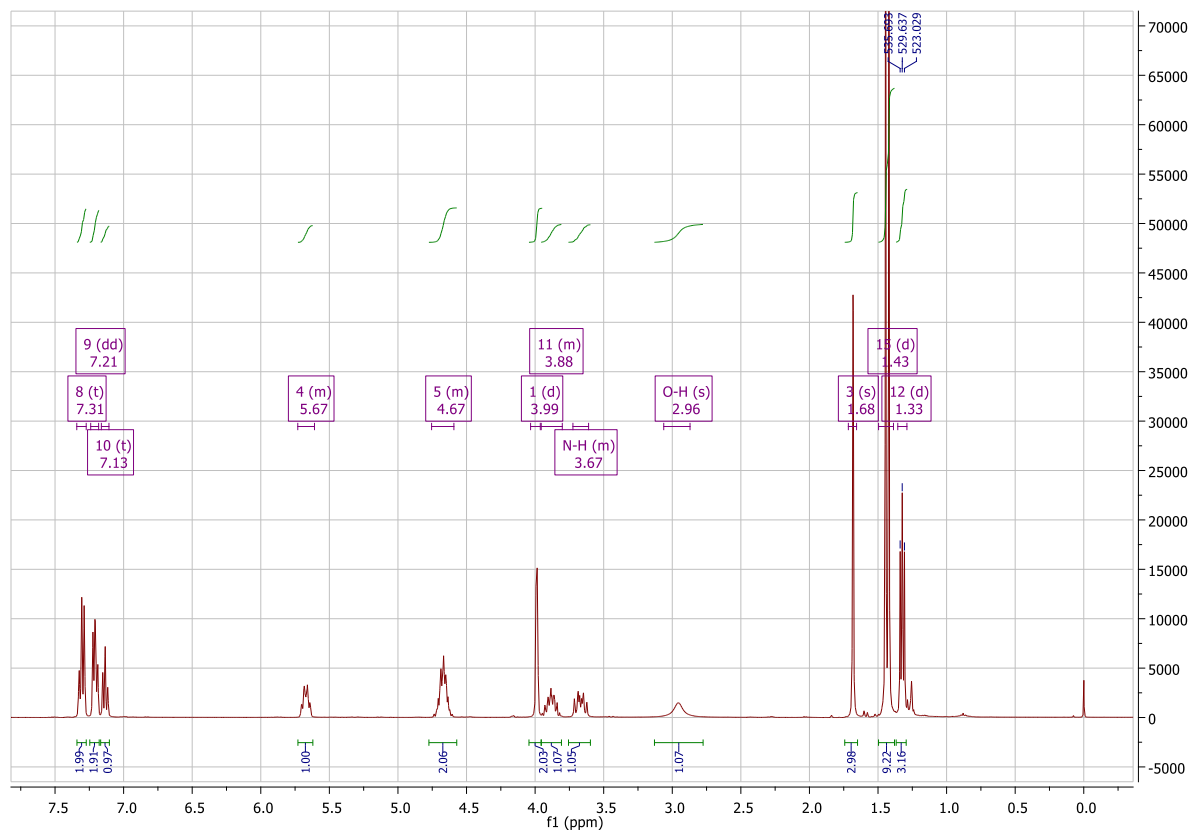

<sup>13</sup>C NMR

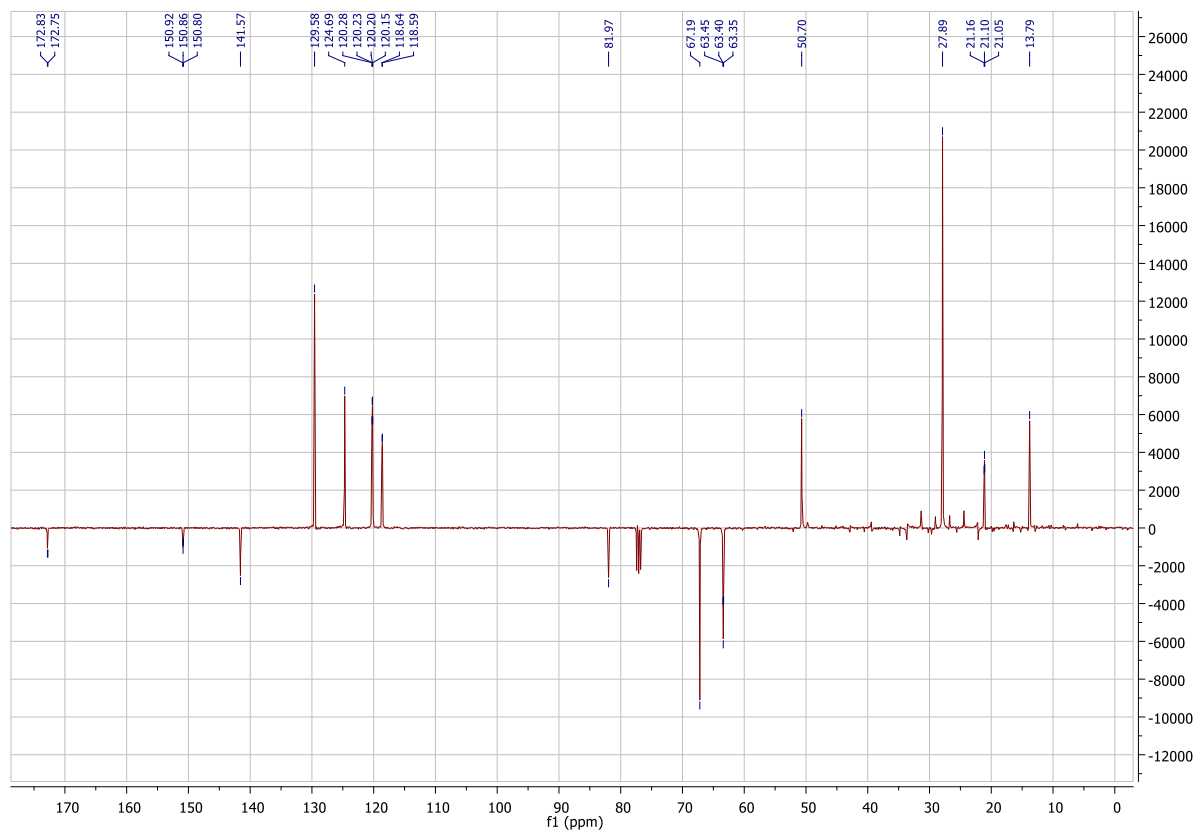

# <sup>1</sup>H COSY

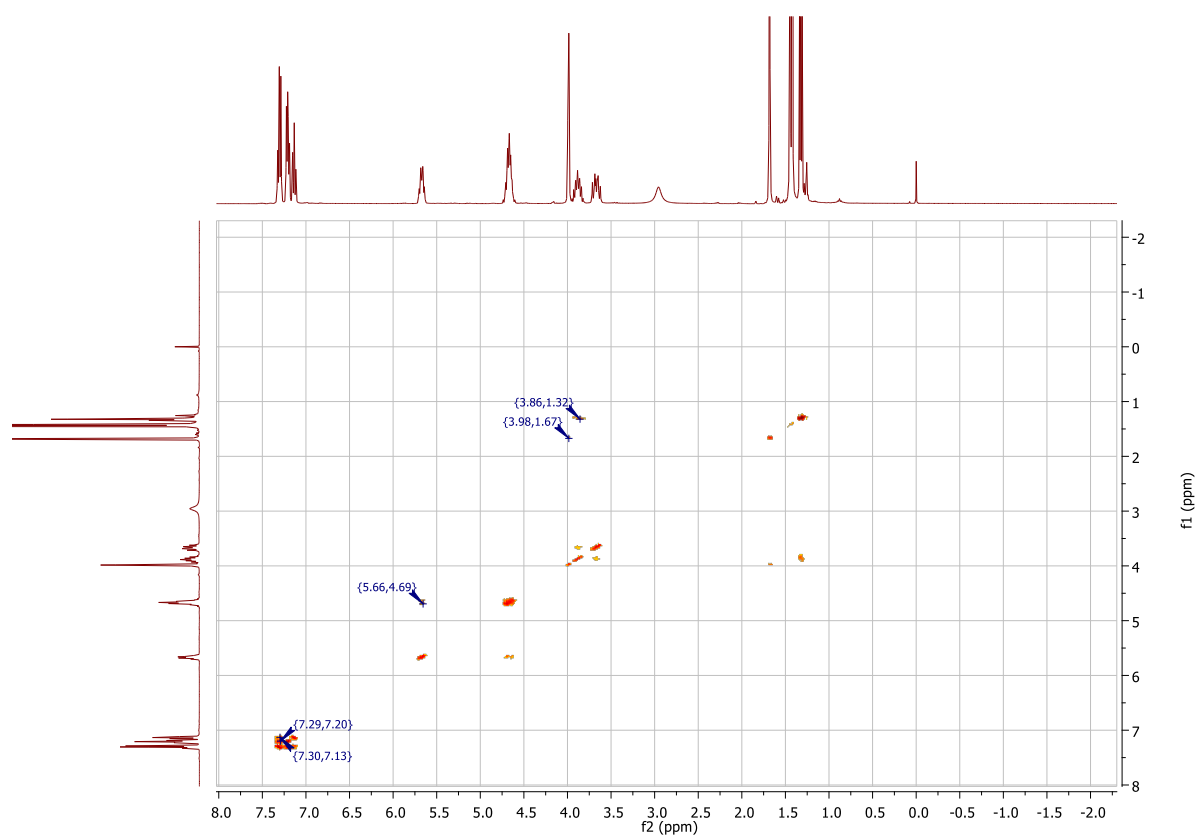

# <sup>13</sup>C DEPT-45

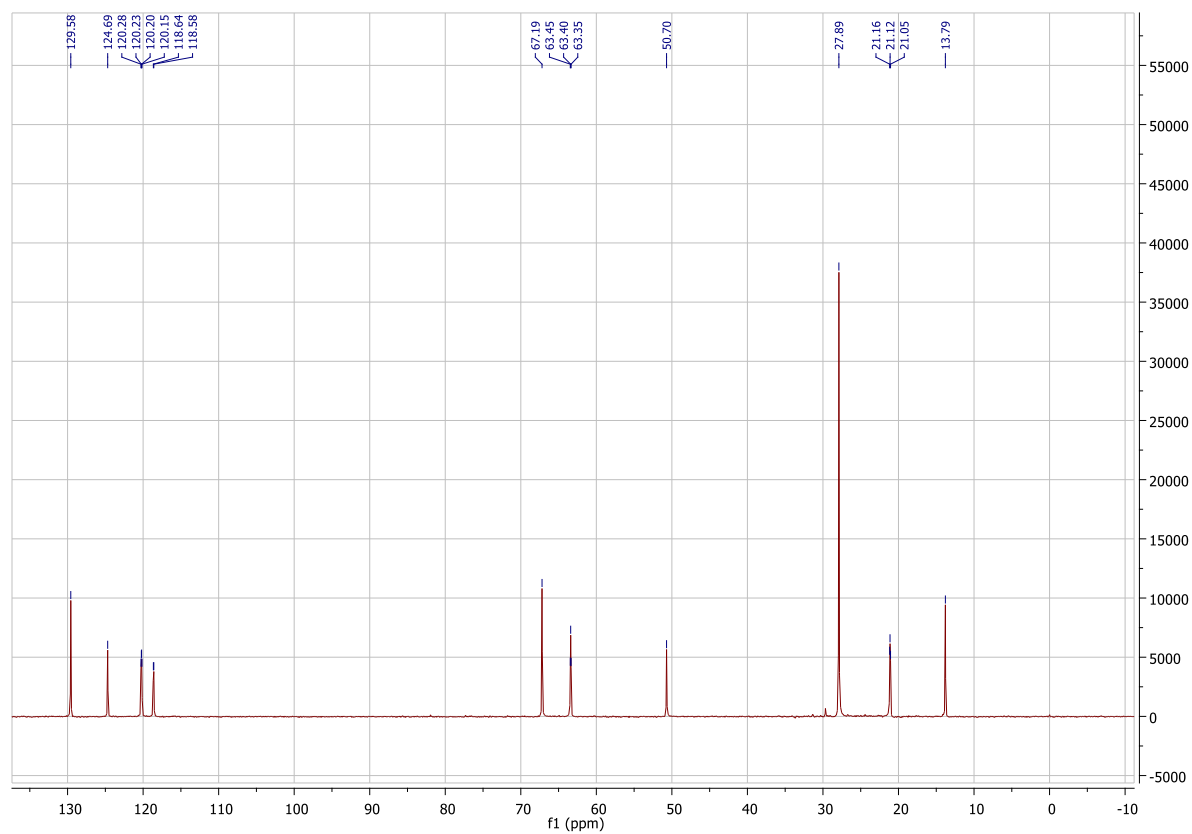

# HSQC

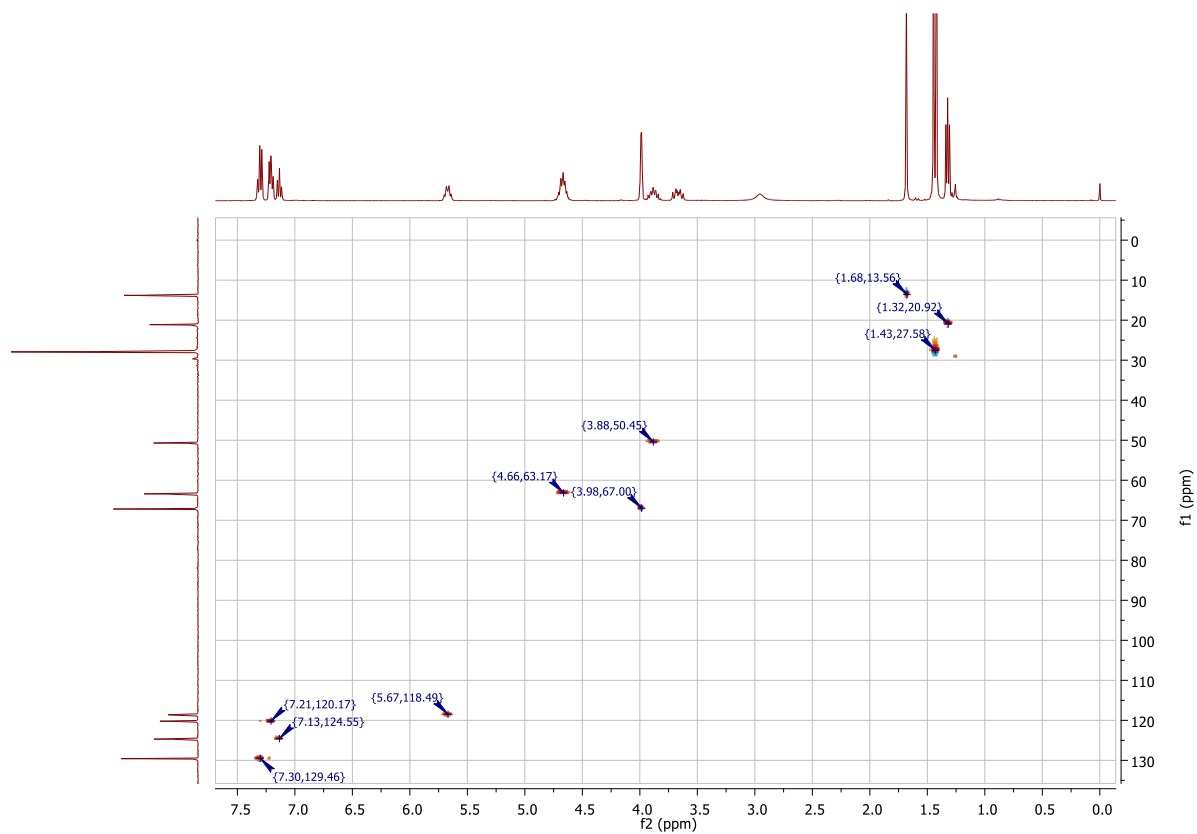

# $^{31}\text{P}$ NMR

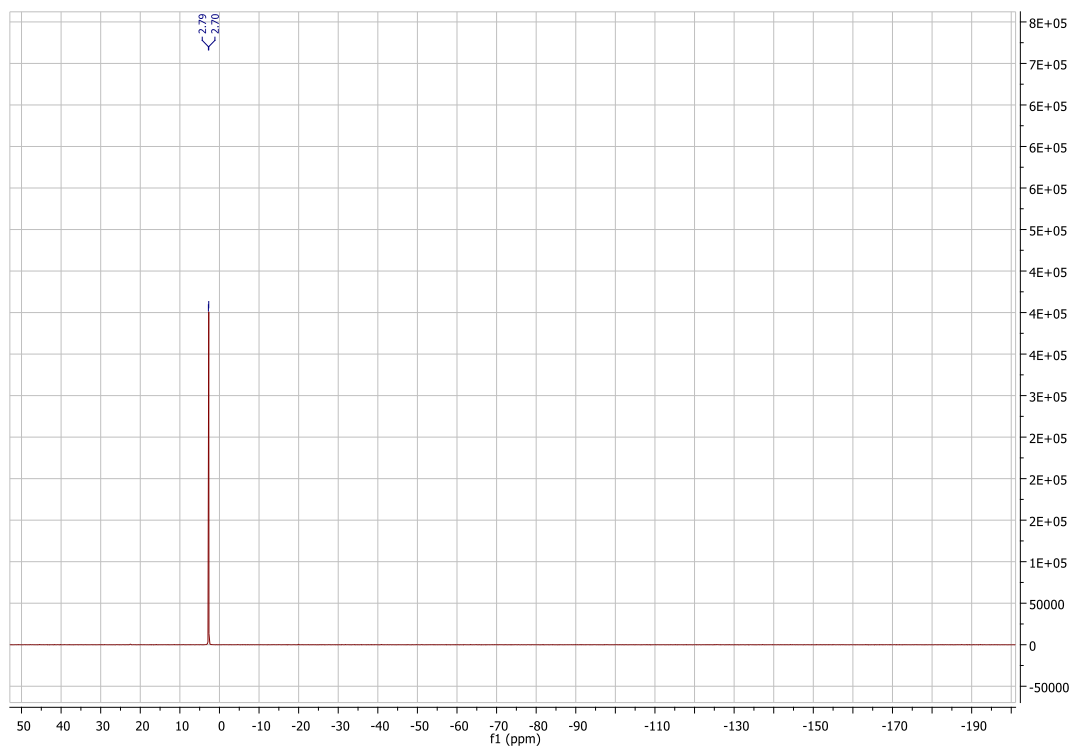

III. HPLC spectra

|                                  |                            |                   |                 |
|----------------------------------|----------------------------|-------------------|-----------------|
| <b>6</b> <b>RM27</b> Compound 5a |                            |                   |                 |
| Sample Name:                     | <b>RM27</b>                | Injection Volume: | <b>20.0</b>     |
| Vial Number:                     | <b>1_4</b>                 | Channel:          | <b>UV_VIS_3</b> |
| Sample Type:                     | <b>unknown</b>             | Wavelength:       | <b>254</b>      |
| Control Program:                 | <b>MeCN 25min gradient</b> | Bandwidth:        | <b>8</b>        |
| Quantif. Method:                 | <b>General Method</b>      | Dilution Factor:  | <b>1.0000</b>   |
| Recording Time:                  | <b>24/2/2017 13:05</b>     | Sample Weight:    | <b>1.0000</b>   |
| Run Time (min):                  | <b>25.00</b>               | Sample Amount:    | <b>1.0000</b>   |

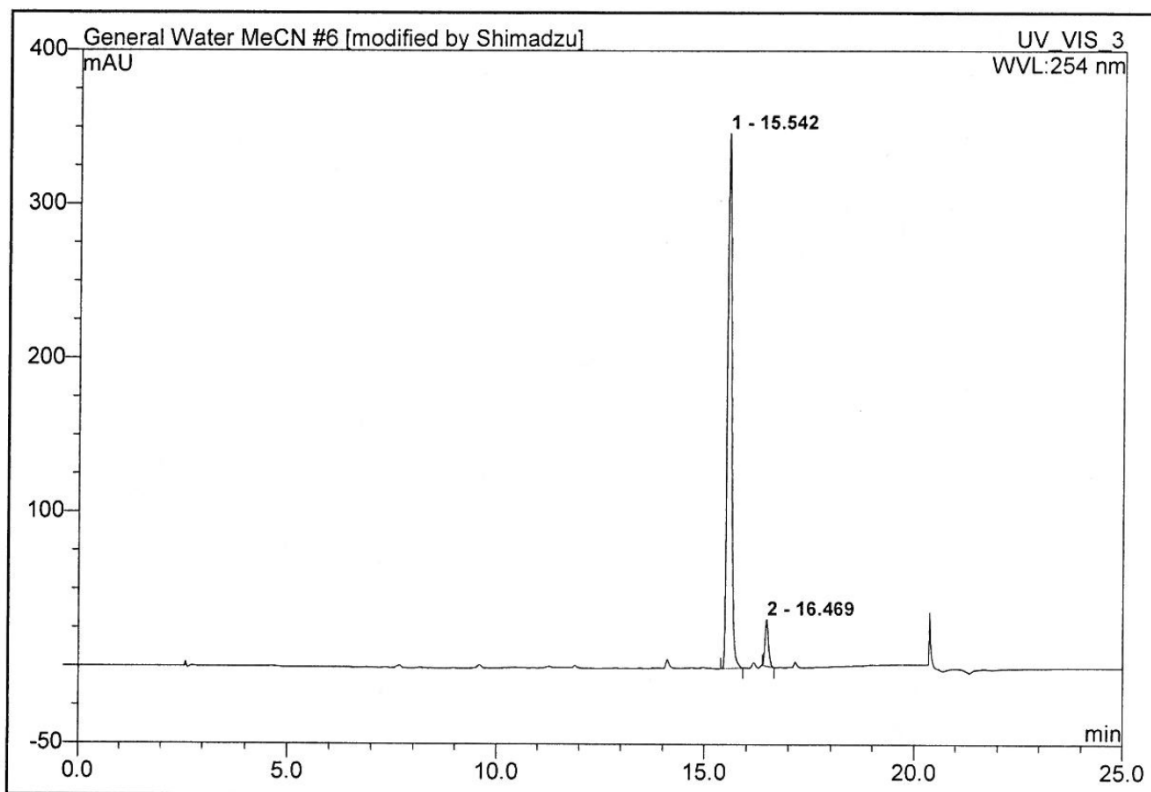

| No.           | Ret.Time min | Peak Name | Height mAU     | Area mAU*min  | Rel.Area %    | Amount       | Type |
|---------------|--------------|-----------|----------------|---------------|---------------|--------------|------|
| 1             | 15.54        | n.a.      | 347.176        | 42.070        | 94.04         | n.a.         | BMB  |
| 2             | 16.47        | n.a.      | 30.133         | 2.667         | 5.96          | n.a.         | BMB  |
| <b>Total:</b> |              |           | <b>377.309</b> | <b>44.737</b> | <b>100.00</b> | <b>0.000</b> |      |

**7 RM29**

Compound 5b

|                  |                     |                   |          |
|------------------|---------------------|-------------------|----------|
| Sample Name:     | RM29                | Injection Volume: | 20.0     |
| Vial Number:     | 1_5                 | Channel:          | UV_VIS_3 |
| Sample Type:     | unknown             | Wavelength:       | 254      |
| Control Program: | MeCN 25min gradient | Bandwidth:        | 8        |
| Quantif. Method: | General Method      | Dilution Factor:  | 1.0000   |
| Recording Time:  | 24/2/2017 13:30     | Sample Weight:    | 1.0000   |
| Run Time (min):  | 25.00               | Sample Amount:    | 1.0000   |

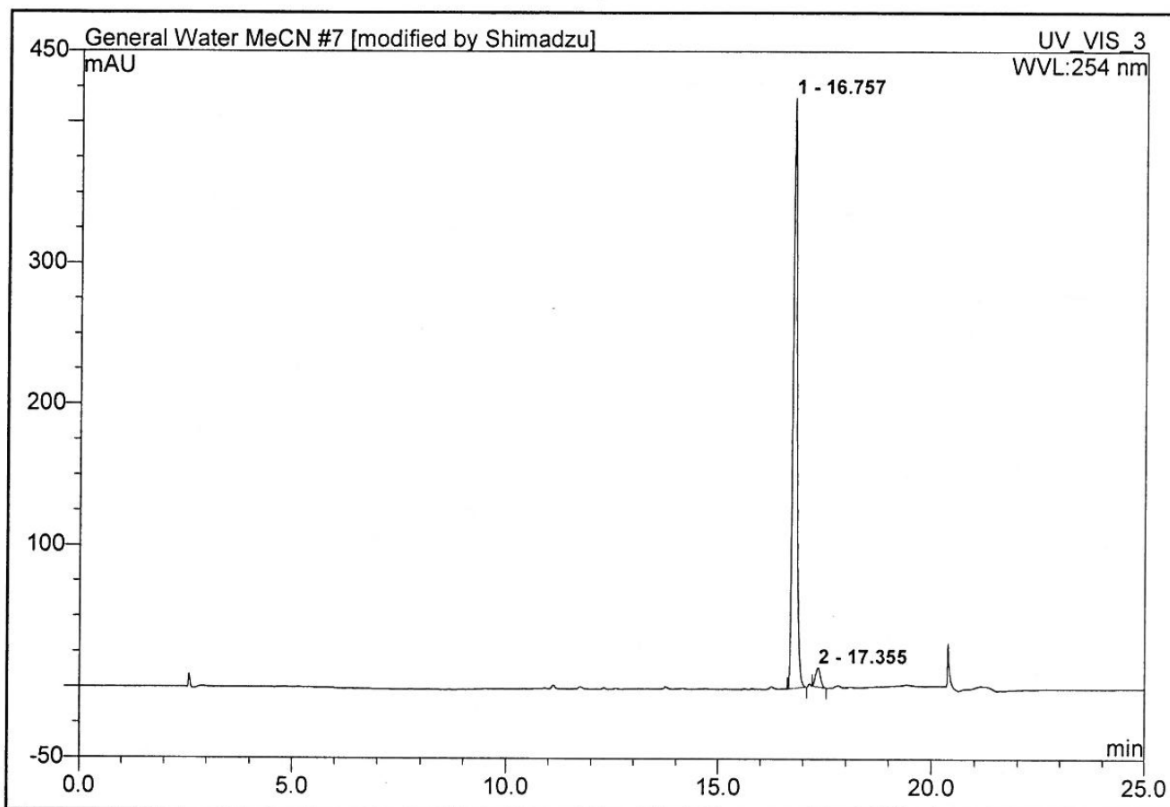

| No.           | Ret.Time<br>min | Peak Name | Height<br>mAU | Area<br>mAU*min | Rel.Area<br>% | Amount | Type |
|---------------|-----------------|-----------|---------------|-----------------|---------------|--------|------|
| 1             | 16.76           | n.a.      | 417.330       | 47.534          | 96.47         | n.a.   | BMB  |
| 2             | 17.35           | n.a.      | 13.383        | 1.742           | 3.53          | n.a.   | BMB  |
| <b>Total:</b> |                 |           | 430.713       | 49.275          | 100.00        | 0.000  |      |

**4** **RM20**

Compound 5c

|                  |                     |                   |          |
|------------------|---------------------|-------------------|----------|
| Sample Name:     | RM20                | Injection Volume: | 20.0     |
| Vial Number:     | 1_2                 | Channel:          | UV_VIS_3 |
| Sample Type:     | unknown             | Wavelength:       | 254      |
| Control Program: | MeCN 25min gradient | Bandwidth:        | 8        |
| Quantif. Method: | General Method      | Dilution Factor:  | 1.0000   |
| Recording Time:  | 24/2/2017 12:14     | Sample Weight:    | 1.0000   |
| Run Time (min):  | 25.00               | Sample Amount:    | 1.0000   |

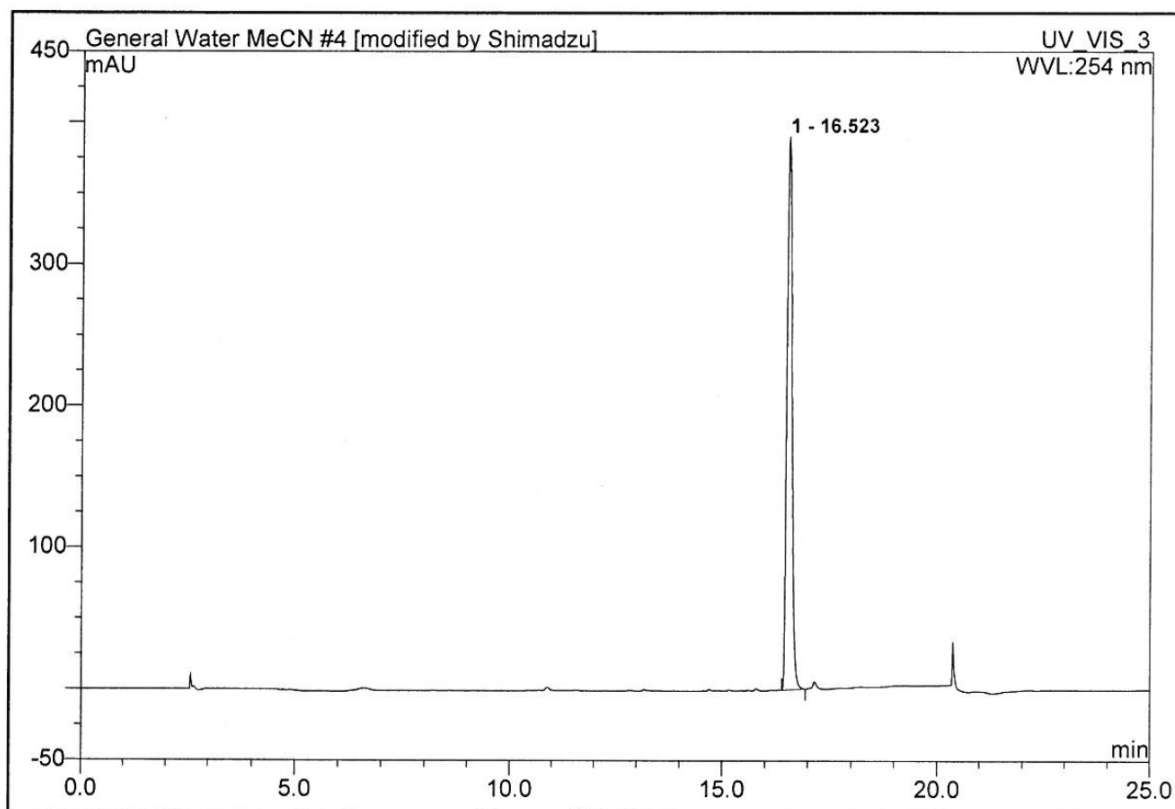

| No.           | Ret.Time<br>min | Peak Name | Height<br>mAU | Area<br>mAU*min | Rel.Area<br>% | Amount | Type |
|---------------|-----------------|-----------|---------------|-----------------|---------------|--------|------|
| 1             | 16.52           | n.a.      | 389.805       | 54.383          | 100.00        | n.a.   | BMB  |
| <b>Total:</b> |                 |           | 389.805       | 54.383          | 100.00        | 0.000  |      |

**5 RM25**

Compound 5d

|                  |                     |                   |          |
|------------------|---------------------|-------------------|----------|
| Sample Name:     | RM25                | Injection Volume: | 20.0     |
| Vial Number:     | 1_3                 | Channel:          | UV_VIS_3 |
| Sample Type:     | unknown             | Wavelength:       | 254      |
| Control Program: | MeCN 25min gradient | Bandwidth:        | 8        |
| Quantif. Method: | General Method      | Dilution Factor:  | 1.0000   |
| Recording Time:  | 24/2/2017 12:39     | Sample Weight:    | 1.0000   |
| Run Time (min):  | 25.00               | Sample Amount:    | 1.0000   |

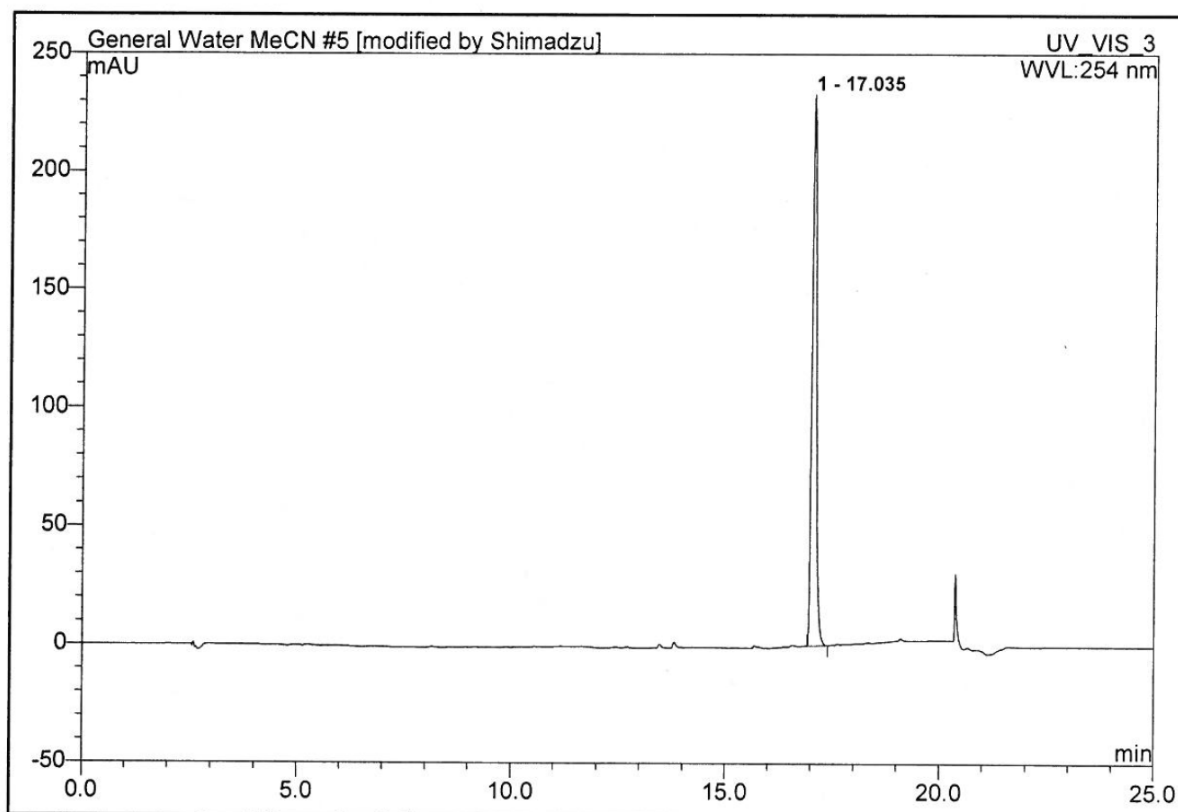

| No.           | Ret.Time<br>min | Peak Name | Height<br>mAU | Area<br>mAU*min | Rel.Area<br>% | Amount | Type |
|---------------|-----------------|-----------|---------------|-----------------|---------------|--------|------|
| 1             | 17.03           | n.a.      | 232.935       | 27.980          | 100.00        | n.a.   | BMB  |
| <b>Total:</b> |                 |           | 232.935       | 27.980          | 100.00        | 0.000  |      |



#### IV. Mass spec data

protected Me ester ProTide 8a

ROSHNI MALDE  
1224846

Elemental Composition Report **Roshni Malde RM27** **Compound 5a**

Single Mass Analysis

Tolerance = 2.0 PPM / DBE: min = -1.5, max = 1000.0

Element prediction: Off

Monoisotopic Mass, Even Electron Ions

416 formula(e) evaluated with 1 results within limits (all results (up to 1000) for each mass)

Elements Used:

C: 0-100 H: 0-100 N: 0-4 O: 0-7 Na: 0-1 Si: 1-1 P: 1-1

Minimum: -1.5

Maximum: 5.0 2.0 1000.0

| Mass     | Calc. Mass | mDa | PPM | DBE | Formula              |
|----------|------------|-----|-----|-----|----------------------|
| 480.1953 | 480.1947   | 0.6 | 1.2 | 5.5 | C21 H36 N O6 Na Si P |

protected Bn ester ProTide 8b

ROSHNI MALDE  
1224846

Elemental Composition Report **Roshni Malde RM29** **Compound 5b**

Single Mass Analysis

Tolerance = 2.0 PPM / DBE: min = -1.5, max = 1000.0

Element prediction: Off

Monoisotopic Mass, Even Electron Ions

489 formula(e) evaluated with 1 results within limits (all results (up to 1000) for each mass)

Elements Used:

C: 0-100 H: 0-100 N: 0-4 O: 0-7 P: 1-1 Si: 1-1 Na: 0-1

Minimum: -1.5

Maximum: 5.0 2.0 1000.0

| Mass     | Calc. Mass | mDa | PPM | DBE | Formula              |
|----------|------------|-----|-----|-----|----------------------|
| 556.2267 | 556.2260   | 0.7 | 1.3 | 9.5 | C27 H40 N O6 P Si Na |

protected ipr ester ProTide 8c

ROSHNI MALDE  
1224846

Elemental Composition Report Roshni Malde (RM20)

### Compound 5c

Single Mass Analysis

Tolerance = 2.0 PPM / DBE: min = -1.5, max = 1000.0

Element prediction: Off

Monoisotopic Mass, Even Electron Ions

444 formula(e) evaluated with 1 results within limits (all results (up to 1000) for each mass)

Elements Used:

C: 0-100 H: 0-100 N: 0-4 O: 0-7 Na: 0-1 P: 1-1 Si: 1-1

|          |            |      |        |     |                      |
|----------|------------|------|--------|-----|----------------------|
| Minimum: |            |      |        |     | -1.5                 |
| Maximum: | 5.0        | 2.0  | 1000.0 |     |                      |
| Mass     | Calc. Mass | mDa  | PPM    | DBE | Formula              |
| 508.2259 | 508.2260   | -0.1 | -0.2   | 5.5 | C23 H40 N O6 Na P Si |

protected tBu ester ProTide 8d

ROSHNI MALDE  
1224846

Elemental Composition Report Roshni Malde (RM25)

### Compound 5d

Single Mass Analysis

Tolerance = 2.0 PPM / DBE: min = -1.5, max = 1000.0

Element prediction: Off

Monoisotopic Mass, Even Electron Ions

460 formula(e) evaluated with 1 results within limits (all results (up to 1000) for each mass)

Elements Used:

C: 0-100 H: 0-100 N: 0-4 O: 0-7 Na: 0-1 Si: 1-1 P: 1-1

|          |            |     |        |     |                      |
|----------|------------|-----|--------|-----|----------------------|
| Minimum: |            |     |        |     | -1.5                 |
| Maximum: | 5.0        | 2.0 | 1000.0 |     |                      |
| Mass     | Calc. Mass | mDa | PPM    | DBE | Formula              |
| 522.2423 | 522.2417   | 0.6 | 1.1    | 5.5 | C24 H42 N O6 Na Si P |
